# Supplementary material for: The use of informativity in the development of robust viromics-based examinations
Source: PeerJ. 2017 May 2;5:e3281. doi: 10.7717/peerj.3281 (PMC5417064; doi:10.7717/peerj.3281)
Supplement: Table S1 — For each coding region within each type species’ genome, the S1, Q1, S2, and Q2 scores are reported. [file peerj-05-3281-s003.xlsx]

## Sheet: Type Genomes
Myoviridae	NCBI Assigned Taxa	NCBI Taxonomy ID #	Type Strain	Type Strain Accession #
	Bcep78virus	1198138	Burkholderia virus Bcep781	NC_004333
	Bcepmuvirus	1198139	Burkholderia virus BcepMu	NC_005882
	Eucampyvirinae	1636616	Campylobacter virus CP220	NC_027997
	Felixo1virus	1198140	Salmonella virus FelixO1	NC_005282
	Hapunavirus	1198976	Halomonas virus HAP1	NC_010342
	Muvirus	186777	Escherichia virus Mu	NC_000929
	Pbunavirus	1198980	Psuedomonas PB1	NC_011810
	Peduovirinae	857479	Escherichia virus P2	NC_001895
	Cd119virus	1198989	Clostridium phage phiCD119	NC_007917
	Phikzvirus	680115	Pseudomonas virus phiKZ	NC_004629
	P1virus	186789	Enterobacteria phage P1	NC_005856
	Spounavirinae	857473	Staphylococcus virus Twort	NC_007021
	Tevenvirinae	1198136	Escherichia virus T4	NC_000866
	Vi1virus	1298971	Salmonella virus Vi1	NC_015296
Podoviridae	NCBI Assigned Taxa	NCBI Taxonomy ID #	Type Strain	Type Strain Accession #
	Autographivirinae	542835	Enterobacteria phage T7	NC_001604
	Bcep22likevirus	1720323	Burkholderia virus Bcep22	NC_005262
	Bpp1virus	542959	Bordetella phage BPP-1	NC_005357
	Epsilon15virus	542960	Salmondella phage epsilon15	NC_004775
	F116virus	1720324	Psudomonas phage F116	NC_006552
	Luz24virus	545932	Pseudomonas phage LUZ24	NC_010325
	N4virus	371730	Escherichia phage N4	NC_008720
	P22virus	186794	Enerobacteria phage P22	NC_002371
	Phieco32virus	680277	Enterobacteria phage Phieco32	NC_010324
	Picovirinae	542836	Bacillus phage phi29	NC_011048
Siphoviridae	NCBI Assigned Taxa	NCBI Taxonomy ID #	Type Strain	Type Strain Accession #
	Triavirus	1623273	Staphylococcus phage 3A	NC_007053
	Biseptimavirus	1623274	Staphylococcus phage 77	NC_005356
	Andromedavirus	1623275	Bacillus phage Andromeda	NC_020478
	Barnyardvirus	1623276	Mycobacterium phage Barnyard	NC_004689
	Bignuzvirus	1623277	Mycobacterium phage BigNuz	NC_023692
	Bronvirus	1623278	Mycobacterium phage bron	NC_014461
	C2virus	186532	Lactococcus phage c2	NC_001706
	C5virus	1623279	Lactobacillus phage c5	NC_019449
	Charlievirus	1623280	Mycobacterium phage Charlie	NC_023729
	Che8virus	1623281	Mycobacterium Che8	NC_004680
	Che9cvirus	1623282	Mycobacterium phage Che9c	NC_004683
	Chivirus	1623283	Salmonella phage Chi	NC_025442
	Cjw1virus	1623284	Mycobacterium phage Cjw1	NC_004681
	Corndogvirus	1623285	Mycobacterium phage Corndog	NC_004685
	D3112virus	1623286	Pseudomonas phage D3112	NC_005178
	D3virus	1623287	Pseudomonas phage D3	NC_002484
	Liefievirus	1623288	Mycobacterium phage Halo	NC_008202
	Hk578virus	1623289	Escherichia phage HK578	NC_019724
	Cecivirus	1623290	Bacillus phage IEBH	NC_011167
	Jerseyvirus	1623291	Salmonella phage Jersey	NC_021777
	L5virus	186764	Mycobacterium phage L5	NC_001335
	Lambdavirus	186765	Enterobacteria phage lambda	NC_001416
	N15virus	308911	Enterobacteria phage N15	NC_001901
	Omegavirus	1623292	Mycobacterium phage Omega	NC_004688
	P23virus	1623293	Thermus virus P23-45	NC_009803
	Pbi1virus	1623294	Mycobacterium phage PBI1	NC_008198
	Pg1virus	1623295 and 213236	Mycobacteriophage PG1	AF547430
	Phic31virus	308912	Streptomyces virus phiC31	NC_001978
	Phicbkvirus	1623296	Caulobacter phage phiCbK	NC_019405
	E125virus	1623297	Bulkholderia phage phiE125	NC_003309
	Phietavirus	1623298	Staphylococcus virus phiETA	NC_003288
	Phifelvirus	1623299	Enterococcus phage phiFL1A	NC_013646
	Phijl1virus	1623300	Lactobacillus phage phiJL-1	NC_006936
	Reyvirus	1623301	Mycobacterium virus Rey	JF937105
	Sap6virus	1623302	Enterococcus virus SAP6	JF731128
	Sfi11virus	1623303	Streptococcus phage Sfi11	NC_002214
	Sfi21dt1virus	1623304	Streptococcus virus DT1	NC_002072
	Sk1virus	1623305	Lactococcus virus sk1	NC_001835
	Spbetavirus	680116	Bacillus virus SPbeta-like	NC_029119
	T5virus	187218	Enterobacteria phage T5	NC_005859
	Tm4virus	1623306	Mycobacterium phage TM4	NC_003387
	Tp21virus	1623307	Bacillus phage BMBtp2	NC_019912
	T1virus	187217	Enterobacteria phage T1	NC_005833
	Wbetavirus	1623308	Bacillus phage WBeta	NC_007734
	Xp10virus	1623309	Xanthomonas phage Xp10	NC_004902
	Yuavirus	1299429	Pseudomonas phage YuA	NC_010116

## Sheet: Scores
GeneID	S1	Q1	S2	Q2
NC_004333
>lcl|NC_004333.2_cds_NP_705629.1_1 [gene=Bcep781-01] [protein=hypothetical protein] [protein_id=NP_705629.1] [location=complement(36..923)]	97.627	99	34.078	60
>lcl|NC_004333.2_cds_YP_022739.1_2 [gene=Bcep781-02] [protein=gp02] [protein_id=YP_022739.1] [location=complement(1064..1264)]	90.909	99	59.259	81
>lcl|NC_004333.2_cds_NP_705630.1_3 [gene=Bcep781-03] [protein=gp03] [protein_id=NP_705630.1] [location=complement(1302..1736)]	50.35	99	0	0
>lcl|NC_004333.2_cds_NP_705631.1_4 [gene=Bcep781-04] [protein=gp04] [protein_id=NP_705631.1] [location=complement(1788..3293)]	48.503	99	0	0
>lcl|NC_004333.2_cds_NP_705632.2_5 [gene=Bcep781-05] [protein=gp05] [protein_id=NP_705632.2] [location=complement(3369..3905)]	44.767	96	0	0
>lcl|NC_004333.2_cds_YP_022740.1_6 [gene=Bcep781-06] [protein=gp06] [protein_id=YP_022740.1] [location=complement(3902..4360)]	45.113	86	0	0
>lcl|NC_004333.2_cds_YP_022741.1_7 [gene=Bcep781-07] [protein=gp07] [protein_id=YP_022741.1] [location=complement(4357..4824)]	41.026	98	27.778	65
>lcl|NC_004333.2_cds_NP_705634.1_8 [gene=Bcep781-08] [protein=gp08] [protein_id=NP_705634.1] [location=complement(4821..5297)]	40.972	88	0	0
>lcl|NC_004333.2_cds_NP_705635.1_9 [gene=Bcep781-09] [protein=gp09] [protein_id=NP_705635.1] [location=complement(5310..5693)]	34.862	75	0	0
>lcl|NC_004333.2_cds_NP_705636.1_10 [gene=Bcep781-10] [protein=gp10] [protein_id=NP_705636.1] [location=complement(5757..6545)]	38.956	91	45.02	92
>lcl|NC_004333.2_cds_NP_705637.1_11 [gene=Bcep781-11] [protein=gp11] [protein_id=NP_705637.1] [location=complement(6702..7166)]	37.195	99	0	0
>lcl|NC_004333.2_cds_NP_705638.1_12 [gene=Bcep781-12] [protein=gp12] [protein_id=NP_705638.1] [location=complement(7276..8286)]	46.726	99	25.698	98
>lcl|NC_004333.2_cds_NP_705639.1_13 [gene=Bcep781-13] [protein=gp13] [protein_id=NP_705639.1] [location=complement(8345..8848)]	44.068	99	0	0
>lcl|NC_004333.2_cds_NP_705640.2_14 [gene=Bcep781-14] [protein=gp14] [protein_id=NP_705640.2] [location=complement(8894..10285)]	59.487	42	33.333	36
>lcl|NC_004333.2_cds_NP_705641.1_15 [gene=Bcep781-15] [protein=gp15] [protein_id=NP_705641.1] [location=10433..11014]	99.482	99	32.353	81
>lcl|NC_004333.2_cds_NP_705642.1_16 [gene=Bcep781-16] [protein=gp16] [protein_id=NP_705642.1] [location=complement(11011..11952)]	47.213	97	28.188	89
>lcl|NC_004333.2_cds_NP_705643.1_17 [gene=Bcep781-17] [protein=gp17] [protein_id=NP_705643.1] [location=complement(11952..14039)]	51.542	64	24.755	58
>lcl|NC_004333.2_cds_NP_705644.1_18 [gene=Bcep781-18] [protein=gp18] [protein_id=NP_705644.1] [location=complement(14042..15565)]	57.62	94	26.033	93
>lcl|NC_004333.2_cds_NP_705645.1_19 [gene=Bcep781-19] [protein=gp19] [protein_id=NP_705645.1] [location=complement(15555..16067)]	46.667	96	0	0
>lcl|NC_004333.2_cds_NP_705646.1_20 [gene=Bcep781-20] [protein=gp20] [protein_id=NP_705646.1] [location=16466..17719]	31.234	92	26.792	62
>lcl|NC_004333.2_cds_NP_705647.1_21 [gene=Bcep781-21] [protein=gp21] [protein_id=NP_705647.1] [location=17952..18659]	30.435	67	0	0
>lcl|NC_004333.2_cds_NP_705648.2_22 [gene=Bcep781-22] [protein=gp22] [protein_id=NP_705648.2] [location=18758..19144]	41.176	91	35.577	80
>lcl|NC_004333.2_cds_NP_705649.1_23 [gene=Bcep781-23] [protein=gp23] [protein_id=NP_705649.1] [location=19193..19498]	96.04	99	0	0
>lcl|NC_004333.2_cds_NP_705650.1_24 [gene=Bcep781-24] [protein=gp24] [protein_id=NP_705650.1] [location=19495..19824]	95	36	0	0
>lcl|NC_004333.2_cds_NP_705651.2_25 [gene=Bcep781-25] [protein=gp25] [protein_id=NP_705651.2] [location=19703..20023]	90.566	99	0	0
>lcl|NC_004333.2_cds_NP_705652.1_26 [gene=Bcep781-26] [protein=gp26] [protein_id=NP_705652.1] [location=20049..20570]	68.462	75	0	0
>lcl|NC_004333.2_cds_NP_705653.1_27 [gene=Bcep781-27] [protein=gp27] [protein_id=NP_705653.1] [location=20572..21339]	95.294	99	34.221	96
>lcl|NC_004333.2_cds_NP_705654.1_28 [gene=Bcep781-28] [protein=gp28] [protein_id=NP_705654.1] [location=21407..21967]	48.649	99	0	0
>lcl|NC_004333.2_cds_NP_705655.1_29 [gene=Bcep781-30] [protein=gp30] [protein_id=NP_705655.1] [location=complement(22178..22525)]	99.074	93	34	83
>lcl|NC_004333.2_cds_NP_705656.1_30 [gene=Bcep781-29] [protein=gp29] [protein_id=NP_705656.1] [location=complement(22178..22504)]	99.074	99	36.145	72
>lcl|NC_004333.2_cds_NP_705657.1_31 [gene=Bcep781-31] [protein=gp31] [protein_id=NP_705657.1] [location=complement(22536..23849)]	55.085	53	0	0
>lcl|NC_004333.2_cds_NP_705658.1_32 [gene=Bcep781-32] [protein=gp32] [protein_id=NP_705658.1] [location=complement(23860..24537)]	67.857	98	28.689	98
>lcl|NC_004333.2_cds_NP_705659.1_33 [gene=Bcep781-33] [protein=gp33] [protein_id=NP_705659.1] [location=complement(24545..25813)]	53.882	99	23.77	57
>lcl|NC_004333.2_cds_NP_705660.1_34 [gene=Bcep781-34] [protein=gp34] [protein_id=NP_705660.1] [location=complement(25865..26044)]	88.136	98	0	0
>lcl|NC_004333.2_cds_NP_705661.1_35 [gene=Bcep781-35] [protein=gp35] [protein_id=NP_705661.1] [location=complement(26268..26462)]	96.875	98	0	0
>lcl|NC_004333.2_cds_NP_705662.2_36 [gene=Bcep781-36] [protein=gp36] [protein_id=NP_705662.2] [location=complement(26465..27208)]	46.535	81	0	0
>lcl|NC_004333.2_cds_NP_705663.1_37 [gene=Bcep781-37] [protein=gp37] [protein_id=NP_705663.1] [location=complement(27201..27392)]	70.588	80	0	0
>lcl|NC_004333.2_cds_NP_705664.1_38 [gene=Bcep781-38] [protein=gp38] [protein_id=NP_705664.1] [location=complement(27389..28315)]	45.865	86	0	0
>lcl|NC_004333.2_cds_YP_022742.1_39 [gene=Bcep781-39] [protein=hypothetical protein] [protein_id=YP_022742.1] [location=complement(28312..28608)]	96.939	99	51.899	80
>lcl|NC_004333.2_cds_NP_705665.2_40 [gene=Bcep781-40] [protein=gp40] [protein_id=NP_705665.2] [location=complement(28608..29126)]	71.098	99	0	0
>lcl|NC_004333.2_cds_NP_705666.1_41 [gene=Bcep781-41] [protein=gp41] [protein_id=NP_705666.1] [location=complement(29142..29288)]	87.5	98	0	0
>lcl|NC_004333.2_cds_NP_705667.1_42 [gene=Bcep781-42] [protein=gp42] [protein_id=NP_705667.1] [location=complement(29298..29504)]	85.106	68	0	0
>lcl|NC_004333.2_cds_YP_022743.1_43 [gene=Bcep781-43] [protein=gp43] [protein_id=YP_022743.1] [location=complement(29501..29686)]	100	98	0	0
>lcl|NC_004333.2_cds_NP_705668.1_44 [gene=Bcep781-44] [protein=gp44] [protein_id=NP_705668.1] [location=complement(29754..31607)]	30.255	98	0	0
>lcl|NC_004333.2_cds_NP_705669.1_45 [gene=Bcep781-45] [protein=gp45] [protein_id=NP_705669.1] [location=complement(31611..32210)]	45.361	97	0	0
>lcl|NC_004333.2_cds_NP_705670.1_46 [gene=Bcep781-46] [protein=gp46] [protein_id=NP_705670.1] [location=complement(32215..32625)]	37.879	96	0	0
>lcl|NC_004333.2_cds_NP_705671.1_47 [gene=Bcep781-47] [protein=gp47] [protein_id=NP_705671.1] [location=complement(32622..33134)]	47.059	99	0	0
>lcl|NC_004333.2_cds_YP_022744.1_48 [gene=Bcep781-48] [protein=gp48] [protein_id=YP_022744.1] [location=complement(33316..33540)]	81.081	99	0	0
>lcl|NC_004333.2_cds_NP_705672.2_49 [gene=Bcep781-49] [protein=gp49] [protein_id=NP_705672.2] [location=complement(33608..35686)]	52.273	6	0	0
>lcl|NC_004333.2_cds_NP_705673.1_50 [gene=Bcep781-50] [protein=gp50] [protein_id=NP_705673.1] [location=complement(35683..36072)]	44.211	72	0	0
>lcl|NC_004333.2_cds_NP_705674.1_51 [gene=Bcep781-51] [protein=gp51] [protein_id=NP_705674.1] [location=complement(36069..36449)]	49.495	77	0	0
>lcl|NC_004333.2_cds_NP_705675.1_52 [gene=Bcep781-52] [protein=gp52] [protein_id=NP_705675.1] [location=36857..39478]	46.667	94	29.459	41
>lcl|NC_004333.2_cds_YP_022745.1_53 [gene=Bcep781-53] [protein=gp53] [protein_id=YP_022745.1] [location=39499..39642]	100	98	0	0
>lcl|NC_004333.2_cds_YP_022746.1_54 [gene=Bcep781-54] [protein=gp54] [protein_id=YP_022746.1] [location=39639..39959]	41.935	58	0	0
>lcl|NC_004333.2_cds_NP_705679.1_55 [gene=Bcep781-55] [protein=gp55] [protein_id=NP_705679.1] [location=39956..40162]	98.529	99	62.121	96
>lcl|NC_004333.2_cds_NP_705680.2_56 [gene=Bcep781-56] [protein=gp56] [protein_id=NP_705680.2] [location=40159..40314]	100	98	0	0
>lcl|NC_004333.2_cds_YP_022747.1_57 [gene=Bcep781-57] [protein=gp57] [protein_id=YP_022747.1] [location=40334..40543]	100	99	0	0
>lcl|NC_004333.2_cds_NP_705681.1_58 [gene=Bcep781-58] [protein=gp58] [protein_id=NP_705681.1] [location=40664..42508]	56.026	99	33.842	60
>lcl|NC_004333.2_cds_NP_705683.1_59 [gene=Bcep781-59] [protein=gp59] [protein_id=NP_705683.1] [location=42519..43604]	99.723	99	0	0
>lcl|NC_004333.2_cds_YP_022748.1_60 [gene=Bcep781-60] [protein=gp60] [protein_id=YP_022748.1] [location=43591..43806]	88.732	99	0	0
>lcl|NC_004333.2_cds_NP_705684.1_61 [gene=Bcep781-61] [protein=gp61] [protein_id=NP_705684.1] [location=43819..44055]	100	99	0	0
>lcl|NC_004333.2_cds_NP_705685.1_62 [gene=Bcep781-62] [protein=gp62] [protein_id=NP_705685.1] [location=44122..46089]	61.043	99	25.681	99
>lcl|NC_004333.2_cds_NP_705686.1_63 [gene=Bcep781-63] [protein=gp63] [protein_id=NP_705686.1] [location=46133..46633]	96.386	99	69.048	50
>lcl|NC_004333.2_cds_NP_705687.1_64 [gene=Bcep781-64] [protein=gp64] [protein_id=NP_705687.1] [location=46719..47030]	34.921	61	0	0
>lcl|NC_004333.2_cds_NP_705688.1_65 [gene=Bcep781-65] [protein=gp65] [protein_id=NP_705688.1] [location=47067..47858]	67.474	99	0	0
>lcl|NC_004333.2_cds_NP_705689.1_66 [gene=Bcep781-66] [protein=gp66] [protein_id=NP_705689.1] [location=47904..48215]	69.565	22	0	0
NC_005882
>lcl|NC_005882.1_cds_YP_024674.1_1 [gene=BcepMu01] [protein=gp01] [protein_id=YP_024674.1] [location=complement(365..736)]	99.187	99	34.343	80
>lcl|NC_005882.1_cds_YP_024675.1_2 [gene=BcepMu02] [protein=gp02] [protein_id=YP_024675.1] [location=complement(733..1173)]	97.26	99	44.03	87
>lcl|NC_005882.1_cds_YP_024676.1_3 [gene=BcepMu03] [protein=gp03] [protein_id=YP_024676.1] [location=complement(1157..1561)]	93.805	84	30.894	81
>lcl|NC_005882.1_cds_YP_024677.1_4 [gene=BcepMu04] [protein=gp04] [protein_id=YP_024677.1] [location=complement(1592..1864)]	97.778	99	53.333	99
>lcl|NC_005882.1_cds_YP_024678.1_5 [gene=BcepMu05] [protein=gp05] [protein_id=YP_024678.1] [location=complement(1928..2545)]	99.024	99	61.765	99
>lcl|NC_005882.1_cds_YP_024679.1_6 [gene=BcepMu06] [protein=gp06] [protein_id=YP_024679.1] [location=complement(2668..3105)]	95	96	57.983	81
>lcl|NC_005882.1_cds_YP_024680.1_7 [gene=BcepMu07] [protein=gp07] [protein_id=YP_024680.1] [location=complement(3126..3455)]	92.661	99	0	0
>lcl|NC_005882.1_cds_YP_024681.1_8 [gene=BcepMu08] [protein=gp08] [protein_id=YP_024681.1] [location=complement(3457..4671)]	98.511	99	0	0
>lcl|NC_005882.1_cds_YP_024682.1_9 [gene=BcepMu09] [protein=gp09] [protein_id=YP_024682.1] [location=complement(4668..6467)]	95.629	95	0	0
>lcl|NC_005882.1_cds_YP_024683.1_10 [gene=BcepMu10] [protein=gp10] [protein_id=YP_024683.1] [location=complement(6485..7438)]	58.974	97	0	0
>lcl|NC_005882.1_cds_YP_024684.1_11 [gene=BcepMu11] [protein=gp11] [protein_id=YP_024684.1] [location=complement(7449..7661)]	98.571	99	0	0
>lcl|NC_005882.1_cds_YP_024685.1_12 [gene=BcepMu12] [protein=gp12] [protein_id=YP_024685.1] [location=complement(7672..7974)]	86.598	96	0	0
>lcl|NC_005882.1_cds_YP_024686.1_13 [gene=BcepMu13] [protein=gp13] [protein_id=YP_024686.1] [location=complement(7971..8450)]	98.113	99	0	0
>lcl|NC_005882.1_cds_YP_024687.1_14 [gene=BcepMu14] [protein=gp14] [protein_id=YP_024687.1] [location=8571..8807]	73.81	53	0	0
>lcl|NC_005882.1_cds_YP_024688.1_15 [gene=BcepMu15] [protein=gp15] [protein_id=YP_024688.1] [location=complement(8638..8970)]	71.429	25	0	0
>lcl|NC_005882.1_cds_YP_024689.1_16 [gene=BcepMu16] [protein=gp16] [protein_id=YP_024689.1] [location=complement(8856..9098)]	47.273	68	41.379	72
>lcl|NC_005882.1_cds_YP_024690.1_17 [gene=BcepMu17] [protein=gp17] [protein_id=YP_024690.1] [location=9226..9642]	75.714	98	51.19	60
>lcl|NC_005882.1_cds_YP_024691.1_18 [gene=BcepMu18] [protein=gp18] [protein_id=YP_024691.1] [location=9639..10421]	78.378	99	0	0
>lcl|NC_005882.1_cds_YP_024692.1_19 [gene=BcepMu19] [protein=gp19] [protein_id=YP_024692.1] [location=10663..11199]	93.258	99	0	0
>lcl|NC_005882.1_cds_YP_024693.1_20 [gene=BcepMu20] [protein=gp20] [protein_id=YP_024693.1] [location=11264..11488]	87.838	99	0	0
>lcl|NC_005882.1_cds_YP_024694.1_21 [gene=BcepMu21] [protein=gp21] [protein_id=YP_024694.1] [location=11555..11902]	99	86	0	0
>lcl|NC_005882.1_cds_YP_024695.1_22 [gene=BcepMu22] [protein=gp22] [protein_id=YP_024695.1] [location=11905..12516]	97.714	86	42.353	83
>lcl|NC_005882.1_cds_YP_024696.1_23 [gene=BcepMu23] [protein=gp23] [protein_id=YP_024696.1] [location=12513..13112]	98.387	31	0	0
>lcl|NC_005882.1_cds_YP_024697.1_24 [gene=BcepMu24] [protein=gp24] [protein_id=YP_024697.1] [location=12820..13074]	98.387	73	0	0
>lcl|NC_005882.1_cds_YP_024698.1_25 [gene=BcepMu25] [protein=gp25] [protein_id=YP_024698.1] [location=13109..13447]	92.857	99	40.351	50
>lcl|NC_005882.1_cds_YP_024699.1_26 [gene=BcepMu26] [protein=gp26] [protein_id=YP_024699.1] [location=13444..13776]	100	99	0	0
>lcl|NC_005882.1_cds_YP_024700.1_27 [gene=BcepMu27] [protein=gp27] [protein_id=YP_024700.1] [location=13778..14323]	98.895	99	0	0
>lcl|NC_005882.1_cds_YP_024701.1_28 [gene=BcepMu28] [protein=gp28] [protein_id=YP_024701.1] [location=14320..15822]	98.2	99	51.762	90
>lcl|NC_005882.1_cds_YP_024702.1_29 [gene=BcepMu29] [protein=gp29] [protein_id=YP_024702.1] [location=15819..17294]	96.538	99	30.407	87
>lcl|NC_005882.1_cds_YP_024703.1_30 [gene=BcepMu30] [protein=gp30] [protein_id=YP_024703.1] [location=17287..18123]	97.482	99	50.566	94
>lcl|NC_005882.1_cds_YP_024704.1_31 [gene=BcepMu31] [protein=gp31] [protein_id=YP_024704.1] [location=18120..18647]	91.429	99	37.5	95
>lcl|NC_005882.1_cds_YP_024705.1_32 [gene=BcepMu32] [protein=gp32] [protein_id=YP_024705.1] [location=18850..19980]	99.359	41	35.849	97
>lcl|NC_005882.1_cds_YP_024706.1_33 [gene=BcepMu33] [protein=gp33] [protein_id=YP_024706.1] [location=19510..19980]	91.667	99	37.19	76
>lcl|NC_005882.1_cds_YP_024707.1_34 [gene=BcepMu34] [protein=gp34] [protein_id=YP_024707.1] [location=20026..20949]	95.114	99	34.839	95
>lcl|NC_005882.1_cds_YP_024708.1_35 [gene=BcepMu35] [protein=gp35] [protein_id=YP_024708.1] [location=21024..21356]	94.545	99	0	0
>lcl|NC_005882.1_cds_YP_024709.1_36 [gene=BcepMu36] [protein=gp36] [protein_id=YP_024709.1] [location=21358..21810]	98.667	99	32.639	95
>lcl|NC_005882.1_cds_YP_024710.1_37 [gene=BcepMu37] [protein=gp37] [protein_id=YP_024710.1] [location=21810..22274]	98.701	99	0	0
>lcl|NC_005882.1_cds_YP_024711.1_38 [gene=BcepMu38] [protein=gp38] [protein_id=YP_024711.1] [location=22271..22516]	95.062	99	0	0
>lcl|NC_005882.1_cds_YP_024712.1_39 [gene=BcepMu39] [protein=gp39] [protein_id=YP_024712.1] [location=22520..23953]	98.742	99	37.333	63
>lcl|NC_005882.1_cds_YP_024713.1_40 [gene=BcepMu40] [protein=gp40] [protein_id=YP_024713.1] [location=23956..24480]	99.425	99	28.313	94
>lcl|NC_005882.1_cds_YP_024714.1_41 [gene=BcepMu41] [protein=gp41] [protein_id=YP_024714.1] [location=24602..24931]	100	22	0	0
>lcl|NC_005882.1_cds_YP_024715.1_42 [gene=BcepMu42] [protein=gp42] [protein_id=YP_024715.1] [location=24858..25061]	97.222	53	0	0
>lcl|NC_005882.1_cds_YP_024716.1_43 [gene=BcepMu43] [protein=gp43] [partial=5'] [protein_id=YP_024716.1] [location=<24977..25363]	96.296	21	0	0
>lcl|NC_005882.1_cds_YP_024717.1_44 [gene=BcepMu44] [protein=gp44] [protein_id=YP_024717.1] [location=25336..27876]	94.828	99	42.857	12
>lcl|NC_005882.1_cds_YP_024718.1_45 [gene=BcepMu45] [protein=gp45] [protein_id=YP_024718.1] [location=27878..28768]	96.622	99	25	36
>lcl|NC_005882.1_cds_YP_024719.1_46 [gene=BcepMu46] [protein=gp46] [protein_id=YP_024719.1] [location=28768..28977]	95.652	99	0	0
>lcl|NC_005882.1_cds_YP_024720.1_47 [gene=BcepMu47] [protein=gp47] [protein_id=YP_024720.1] [location=28965..30170]	96.509	99	33.333	47
>lcl|NC_005882.1_cds_YP_024721.1_48 [gene=BcepMu48] [protein=gp48] [protein_id=YP_024721.1] [location=30167..30769]	97.5	99	29.474	92
>lcl|NC_005882.1_cds_YP_024722.1_49 [gene=BcepMu49] [protein=gp49] [protein_id=YP_024722.1] [location=30823..31176]	95.726	99	41.176	57
>lcl|NC_005882.1_cds_YP_024723.1_50 [gene=BcepMu50] [protein=gp50] [protein_id=YP_024723.1] [location=31173..32324]	83.29	99	28.161	90
>lcl|NC_005882.1_cds_YP_024724.1_51 [gene=BcepMu51] [protein=gp51] [protein_id=YP_024724.1] [location=32317..32898]	81.564	92	36.047	88
>lcl|NC_005882.1_cds_YP_024725.1_52 [gene=BcepMu52] [protein=gp52] [protein_id=YP_024725.1] [location=32898..35255]	49.398	41	46.341	12
>lcl|NC_005882.1_cds_YP_024726.1_53 [gene=BcepMu53] [protein=gp53] [protein_id=YP_024726.1] [location=complement(35456..36589)]	100	99	25.45	95
NC_027997
>lcl|NC_027997.1_cds_YP_009169135.1_1 [gene=APL47_gp001] [protein=putative phage DNA packaging protein (terminase)] [protein_id=YP_009169135.1] [location=78..2312]	32.203	16	32.979	62
>lcl|NC_027997.1_cds_YP_009169136.1_2 [gene=APL47_gp002] [protein=Putative base plate hub assembly catalyst] [protein_id=YP_009169136.1] [location=2328..3062]	95.767	77	0	0
>lcl|NC_027997.1_cds_YP_009169137.1_3 [gene=APL47_gp003] [protein=hypothetical protein] [protein_id=YP_009169137.1] [location=complement(3095..3511)]	96.078	37	0	0
>lcl|NC_027997.1_cds_YP_009169138.1_4 [gene=APL47_gp004] [protein=hypothetical protein] [protein_id=YP_009169138.1] [location=3627..3815]	96.774	98	0	0
>lcl|NC_027997.1_cds_YP_009169139.1_5 [gene=APL47_gp005] [protein=Putative phage DNA topoisomerase (large subunit)] [protein_id=YP_009169139.1] [location=3896..5407]	30.803	88	37.769	97
>lcl|NC_027997.1_cds_YP_009169140.1_6 [gene=APL47_gp006] [protein=hypothetical protein] [protein_id=YP_009169140.1] [location=5407..5940]	32.432	79	0	0
>lcl|NC_027997.1_cds_YP_009169141.1_7 [gene=APL47_gp007] [protein=hypothetical phage protein (possible dUTP pyrophosphatase)] [protein_id=YP_009169141.1] [location=5952..6410]	43.689	67	44.66	67
>lcl|NC_027997.1_cds_YP_009169142.1_8 [gene=APL47_gp008] [protein=hypothetical protein] [protein_id=YP_009169142.1] [location=6452..6694]	97.5	99	0	0
>lcl|NC_027997.1_cds_YP_009169143.1_9 [gene=APL47_gp009] [protein=Putative DNA primase subunit] [protein_id=YP_009169143.1] [location=6707..7750]	28.485	93	28.485	93
>lcl|NC_027997.1_cds_YP_009169144.1_10 [gene=APL47_gp010] [protein=Putative DNA polymerase accessory factor (sliding clamp loader)] [protein_id=YP_009169144.1] [location=7810..8724]	37.631	91	37.631	91
>lcl|NC_027997.1_cds_YP_009169145.1_11 [gene=APL47_gp011] [protein=Putative phage RNase H] [protein_id=YP_009169145.1] [location=8734..9792]	26.42	96	28.182	90
>lcl|NC_027997.1_cds_YP_009169146.1_12 [gene=APL47_gp012] [protein=hypothetical protein] [protein_id=YP_009169146.1] [location=9852..10400]	85.714	99	0	0
>lcl|NC_027997.1_cds_YP_009169147.1_13 [gene=APL47_gp013] [protein=hypothetical protein] [protein_id=YP_009169147.1] [location=10445..11077]	94.891	65	0	0
>lcl|NC_027997.1_cds_YP_009169148.1_14 [gene=APL47_gp014] [protein=Putative base plate hub subunit protein] [protein_id=YP_009169148.1] [location=11137..11814]	93.333	99	0	0
>lcl|NC_027997.1_cds_YP_009169149.1_15 [gene=APL47_gp015] [protein=hypothetical protein] [protein_id=YP_009169149.1] [location=11829..12527]	94.828	99	0	0
>lcl|NC_027997.1_cds_YP_009169150.1_16 [gene=APL47_gp016] [protein=hypothetical protein] [protein_id=YP_009169150.1] [location=12660..12866]	80.556	99	0	0
>lcl|NC_027997.1_cds_YP_009169151.1_17 [gene=APL47_gp017] [protein=hypothetical protein] [protein_id=YP_009169151.1] [location=12969..13763]	97.348	99	30.935	99
>lcl|NC_027997.1_cds_YP_009169152.1_18 [gene=APL47_gp018] [protein=hypothetical phage membrane protein] [protein_id=YP_009169152.1] [location=13763..14023]	90.698	99	0	0
>lcl|NC_027997.1_cds_YP_009169153.1_19 [gene=APL47_gp019] [protein=hypothetical protein] [protein_id=YP_009169153.1] [location=14033..14803]	95.331	99	0	0
>lcl|NC_027997.1_cds_YP_009169154.1_20 [gene=APL47_gp020] [protein=hypothetical protein] [protein_id=YP_009169154.1] [location=14828..15205]	90.226	99	0	0
>lcl|NC_027997.1_cds_YP_009169155.1_21 [gene=APL47_gp021] [protein=hypothetical protein] [protein_id=YP_009169155.1] [location=15205..16143]	100	6	0	0
>lcl|NC_027997.1_cds_YP_009169156.1_22 [gene=APL47_gp022] [protein=hypothetical protein] [protein_id=YP_009169156.1] [location=16121..16345]	59.615	69	0	0
>lcl|NC_027997.1_cds_YP_009169157.1_23 [gene=APL47_gp023] [protein=hypothetical protein] [protein_id=YP_009169157.1] [location=16347..17450]	29.474	25	22.034	87
>lcl|NC_027997.1_cds_YP_009169158.1_24 [gene=APL47_gp024] [protein=hypothetical protein] [protein_id=YP_009169158.1] [location=17532..17864]	32.955	78	34.091	78
>lcl|NC_027997.1_cds_YP_009169159.1_25 [gene=APL47_gp025] [protein=hypothetical protein] [protein_id=YP_009169159.1] [location=complement(17892..18497)]	36.979	95	37.5	95
>lcl|NC_027997.1_cds_YP_009169160.1_26 [gene=APL47_gp026] [protein=hypothetical protein] [protein_id=YP_009169160.1] [location=18561..20072]	97.938	19	32.381	19
>lcl|NC_027997.1_cds_YP_009169161.1_27 [gene=APL47_gp027] [protein=possible virion structural protein] [protein_id=YP_009169161.1] [location=20098..21285]	98.246	14	0	0
>lcl|NC_027997.1_cds_YP_009169162.1_28 [gene=APL47_gp028] [protein=hypothetical phage membrane protein] [protein_id=YP_009169162.1] [location=21329..21505]	87.273	93	0	0
>lcl|NC_027997.1_cds_YP_009169163.1_29 [gene=APL47_gp029] [protein=Possible EndoVII packaging and recombination endonuclease] [protein_id=YP_009169163.1] [location=21515..22051]	87.719	32	35.417	49
>lcl|NC_027997.1_cds_YP_009169164.1_30 [gene=APL47_gp030] [protein=Possible phage prohead assembley initiator protein / portal protein] [protein_id=YP_009169164.1] [location=22100..23809]	100	9	33.205	89
>lcl|NC_027997.1_cds_YP_009169165.1_31 [gene=APL47_gp031] [protein=hypothetical protein] [protein_id=YP_009169165.1] [location=23882..24175]	100	99	0	0
>lcl|NC_027997.1_cds_YP_009169166.1_32 [gene=APL47_gp032] [protein=hypothetical protein] [protein_id=YP_009169166.1] [location=24206..24577]	53.333	73	0	0
>lcl|NC_027997.1_cds_YP_009169167.1_33 [gene=APL47_gp033] [protein=Possible phage DNA ligase] [protein_id=YP_009169167.1] [location=24629..25918]	26.637	98	29.476	98
>lcl|NC_027997.1_cds_YP_009169168.1_34 [gene=APL47_gp034] [protein=Probable phage tail sheath protein] [protein_id=YP_009169168.1] [location=complement(25935..27485)]	26.582	15	24.519	75
>lcl|NC_027997.1_cds_YP_009169169.1_35 [gene=APL47_gp035] [protein=ISCaje1 transposase] [protein_id=YP_009169169.1] [location=complement(27555..28799)]	92.593	7	29.439	49
>lcl|NC_027997.1_cds_YP_009169170.1_36 [gene=APL47_gp036] [protein=hypothetical protein] [protein_id=YP_009169170.1] [location=complement(29116..30318)]	38.686	33	0	0
>lcl|NC_027997.1_cds_YP_009169171.1_37 [gene=APL47_gp037] [protein=Possible outer wedge baseplate protein and lysozyme] [protein_id=YP_009169171.1] [location=complement(30382..30744)]	27	83	34.884	71
>lcl|NC_027997.1_cds_YP_009169172.1_38 [gene=APL47_gp038] [protein=hypothetical protein] [protein_id=YP_009169172.1] [location=complement(30797..31219)]	45.313	44	45.313	44
>lcl|NC_027997.1_cds_YP_009169173.1_39 [gene=APL47_gp039] [protein=hypothetical phage exported protein] [protein_id=YP_009169173.1] [location=complement(31363..31689)]	90.741	99	0	0
>lcl|NC_027997.1_cds_YP_009169174.1_40 [gene=APL47_gp040] [protein=hypothetical phage membrane protein] [protein_id=YP_009169174.1] [location=complement(31750..31962)]	41.071	79	0	0
>lcl|NC_027997.1_cds_YP_009169175.1_41 [gene=APL47_gp041] [protein=Possible phage baseplate wedge protein] [protein_id=YP_009169175.1] [location=32212..35856]	27.86	42	28.598	42
>lcl|NC_027997.1_cds_YP_009169176.1_42 [gene=APL47_gp042] [protein=hypothetical protein] [protein_id=YP_009169176.1] [location=35925..36599]	36.025	69	0	0
>lcl|NC_027997.1_cds_YP_009169177.1_43 [gene=APL47_gp043] [protein=hypothetical protein] [protein_id=YP_009169177.1] [location=36610..37275]	31.818	58	0	0
>lcl|NC_027997.1_cds_YP_009169178.1_44 [gene=APL47_gp044] [protein=hypothetical protein] [protein_id=YP_009169178.1] [location=37329..41489]	25.743	14	25.743	14
>lcl|NC_027997.1_cds_YP_009169179.1_45 [gene=APL47_gp045] [protein=Possible phage tail tube protein] [protein_id=YP_009169179.1] [location=41505..42263]	25.17	54	32.432	56
>lcl|NC_027997.1_cds_YP_009169180.1_46 [gene=APL47_gp046] [protein=Possible phage head completion protein] [protein_id=YP_009169180.1] [location=43063..43488]	36.667	96	36.364	96
>lcl|NC_027997.1_cds_YP_009169181.1_47 [gene=APL47_gp047] [protein=hypothetical protein] [protein_id=YP_009169181.1] [location=44088..44747]	96.347	99	0	0
>lcl|NC_027997.1_cds_YP_009169182.1_48 [gene=APL47_gp048] [protein=hypothetical protein] [protein_id=YP_009169182.1] [location=44805..45572]	52.703	29	44.144	41
>lcl|NC_027997.1_cds_YP_009169183.1_49 [gene=APL47_gp049] [protein=hypothetical protein] [protein_id=YP_009169183.1] [location=45569..45823]	97.619	99	0	0
>lcl|NC_027997.1_cds_YP_009169184.1_50 [gene=APL47_gp050] [protein=Possible prohead core scaffold protein] [protein_id=YP_009169184.1] [location=45994..46713]	98.333	25	0	0
>lcl|NC_027997.1_cds_YP_009169185.1_51 [gene=APL47_gp051] [protein=Possible phage major capsid protein] [protein_id=YP_009169185.1] [location=46785..48119]	39.696	97	40.347	97
>lcl|NC_027997.1_cds_YP_009169186.1_52 [gene=APL47_gp052] [protein=Possible tail sheath protein] [protein_id=YP_009169186.1] [location=48293..49909]	26.582	14	40.476	16
>lcl|NC_027997.1_cds_YP_009169187.1_53 [gene=APL47_gp053] [protein=Possible phage tail sheath protein] [protein_id=YP_009169187.1] [location=49913..51649]	27.46	72	43.384	79
>lcl|NC_027997.1_cds_YP_009169188.1_54 [gene=APL47_gp054] [protein=Possible homing endonuclease] [protein_id=YP_009169188.1] [location=complement(51684..53408)]	43.82	15	47.205	55
>lcl|NC_027997.1_cds_YP_009169189.1_55 [gene=APL47_gp055] [protein=hypothetical protein] [protein_id=YP_009169189.1] [location=53542..54573]	50.729	97	51.17	97
>lcl|NC_027997.1_cds_YP_009169190.1_56 [gene=APL47_gp056] [protein=hypothetical protein] [protein_id=YP_009169190.1] [location=54675..55451]	95.736	99	0	0
>lcl|NC_027997.1_cds_YP_009169191.1_57 [gene=APL47_gp057] [protein=hypothetical protein] [protein_id=YP_009169191.1] [location=55493..56035]	34.314	56	0	0
>lcl|NC_027997.1_cds_YP_009169192.1_58 [gene=APL47_gp058] [protein=Possible phage tail tube protein] [protein_id=YP_009169192.1] [location=56719..57309]	19.369	86	36.747	84
>lcl|NC_027997.1_cds_YP_009169193.1_59 [gene=APL47_gp059] [protein=hypothetical protein] [protein_id=YP_009169193.1] [location=57361..57861]	39.073	89	39.073	89
>lcl|NC_027997.1_cds_YP_009169194.1_60 [gene=APL47_gp060] [protein=hypothetical protein] [protein_id=YP_009169194.1] [location=57972..59423]	92.958	15	25.873	92
>lcl|NC_027997.1_cds_YP_009169195.1_61 [gene=APL47_gp061] [protein=hypothetical protein] [protein_id=YP_009169195.1] [location=59622..60116]	76.984	73	76.129	94
>lcl|NC_027997.1_cds_YP_009169196.1_62 [gene=APL47_gp062] [protein=hypothetical protein] [protein_id=YP_009169196.1] [location=60411..60683]	100	99	0	0
>lcl|NC_027997.1_cds_YP_009169197.1_63 [gene=APL47_gp063] [protein=hypothetical protein] [protein_id=YP_009169197.1] [location=60754..60915]	100	98	0	0
>lcl|NC_027997.1_cds_YP_009169198.1_64 [gene=APL47_gp064] [protein=hypothetical protein] [protein_id=YP_009169198.1] [location=60928..61302]	40.278	44	86	40
>lcl|NC_027997.1_cds_YP_009169199.1_65 [gene=APL47_gp065] [protein=hypothetical protein] [protein_id=YP_009169199.1] [location=61404..61904]	95.205	87	0	0
>lcl|NC_027997.1_cds_YP_009169200.1_66 [gene=APL47_gp066] [protein=hypothetical protein] [protein_id=YP_009169200.1] [location=61960..62946]	99.39	99	0	0
>lcl|NC_027997.1_cds_YP_009169201.1_67 [gene=APL47_gp067] [protein=hypothetical protein] [protein_id=YP_009169201.1] [location=63031..63219]	98.387	98	0	0
>lcl|NC_027997.1_cds_YP_009169202.1_68 [gene=APL47_gp068] [protein=hypothetical protein] [protein_id=YP_009169202.1] [location=63331..64290]	99.687	99	0	0
>lcl|NC_027997.1_cds_YP_009169203.1_69 [gene=APL47_gp069] [protein=hypothetical protein] [protein_id=YP_009169203.1] [location=64331..64936]	43.523	94	0	0
>lcl|NC_027997.1_cds_YP_009169204.1_70 [gene=APL47_gp070] [protein=hypothetical protein] [protein_id=YP_009169204.1] [location=65165..65761]	97.368	19	0	0
>lcl|NC_027997.1_cds_YP_009169205.1_71 [gene=APL47_gp071] [protein=hypothetical protein] [protein_id=YP_009169205.1] [location=65899..66264]	34.375	52	41.593	93
>lcl|NC_027997.1_cds_YP_009169206.1_72 [gene=APL47_gp072] [protein=hypothetical protein] [protein_id=YP_009169206.1] [location=66304..66882]	94.792	99	0	0
>lcl|NC_027997.1_cds_YP_009169207.1_73 [gene=APL47_gp073] [protein=Possible base plate lysozyme] [protein_id=YP_009169207.1] [location=66941..67825]	21.456	78	23.226	93
>lcl|NC_027997.1_cds_YP_009169208.1_74 [gene=APL47_gp074] [protein=hypothetical phage membrane protein] [protein_id=YP_009169208.1] [location=67864..68295]	87.778	63	0	0
>lcl|NC_027997.1_cds_YP_009169209.1_75 [gene=APL47_gp075] [protein=hypothetical protein] [protein_id=YP_009169209.1] [location=68295..68588]	47.423	99	48.454	99
>lcl|NC_027997.1_cds_YP_009169210.1_76 [gene=APL47_gp076] [protein=hypothetical protein] [protein_id=YP_009169210.1] [location=68613..68864]	89.157	99	0	0
>lcl|NC_027997.1_cds_YP_009169211.1_77 [gene=APL47_gp077] [protein=hypothetical protein] [protein_id=YP_009169211.1] [location=68914..69738]	33.333	24	0	0
>lcl|NC_027997.1_cds_YP_009169212.1_78 [gene=APL47_gp078] [protein=hypothetical protein] [protein_id=YP_009169212.1] [location=69757..70080]	100	38	0	0
>lcl|NC_027997.1_cds_YP_009169213.1_79 [gene=APL47_gp079] [protein=hypothetical protein] [protein_id=YP_009169213.1] [location=complement(70243..70569)]	100	21	0	0
>lcl|NC_027997.1_cds_YP_009169214.1_80 [gene=APL47_gp080] [protein=hypothetical phage protein (Radical SAM family)] [protein_id=YP_009169214.1] [location=70690..71676]	39.256	73	0	0
>lcl|NC_027997.1_cds_YP_009169215.1_81 [gene=APL47_gp081] [protein=Radical SAM family phage protein] [protein_id=YP_009169215.1] [location=71673..72539]	29.474	29	0	0
>lcl|NC_027997.1_cds_YP_009169216.1_82 [gene=APL47_gp082] [protein=hypothetical protein] [protein_id=YP_009169216.1] [location=72574..73413]	27.311	75	0	0
>lcl|NC_027997.1_cds_YP_009169217.1_83 [gene=APL47_gp083] [protein=hypothetical phage protein (Radical SAM family)] [protein_id=YP_009169217.1] [location=73382..74362]	32.432	33	0	0
>lcl|NC_027997.1_cds_YP_009169218.1_84 [gene=APL47_gp084] [protein=hypothetical phage protein (Radical SAM family)] [protein_id=YP_009169218.1] [location=74371..75399]	45.313	17	0	0
>lcl|NC_027997.1_cds_YP_009169219.1_85 [gene=APL47_gp085] [protein=hypothetical protein] [protein_id=YP_009169219.1] [location=75396..75917]	100	91	0	0
>lcl|NC_027997.1_cds_YP_009169220.1_86 [gene=APL47_gp086] [protein=hypothetical phage protein (possible glycine amidinotransferase)] [protein_id=YP_009169220.1] [location=75914..76975]	28.771	99	0	0
>lcl|NC_027997.1_cds_YP_009169221.1_87 [gene=APL47_gp087] [protein=hypothetical phage protein (Radical SAM family)] [protein_id=YP_009169221.1] [location=76972..77721]	99.598	99	0	0
>lcl|NC_027997.1_cds_YP_009169222.1_88 [gene=APL47_gp088] [protein=hypothetical protein] [protein_id=YP_009169222.1] [location=77697..78497]	39.669	44	0	0
>lcl|NC_027997.1_cds_YP_009169223.1_89 [gene=APL47_gp089] [protein=hypothetical protein] [protein_id=YP_009169223.1] [location=78494..79273]	25	58	0	0
>lcl|NC_027997.1_cds_YP_009169224.1_90 [gene=APL47_gp090] [protein=hypothetical protein] [protein_id=YP_009169224.1] [location=79258..79755]	99.394	99	0	0
>lcl|NC_027997.1_cds_YP_009169225.1_91 [gene=APL47_gp091] [protein=hypothetical protein] [protein_id=YP_009169225.1] [location=79813..80205]	44.231	39	0	0
>lcl|NC_027997.1_cds_YP_009169226.1_92 [gene=APL47_gp092] [protein=hypothetical protein] [protein_id=YP_009169226.1] [location=80223..80717]	100	89	0	0
>lcl|NC_027997.1_cds_YP_009169227.1_93 [gene=APL47_gp093] [protein=hypothetical protein] [protein_id=YP_009169227.1] [location=80820..81383]	29.771	63	0	0
>lcl|NC_027997.1_cds_YP_009169228.1_94 [gene=APL47_gp094] [protein=hypothetical protein] [protein_id=YP_009169228.1] [location=81494..81790]	95.918	99	0	0
>lcl|NC_027997.1_cds_YP_009169229.1_95 [gene=APL47_gp095] [protein=hypothetical phage membrane] [protein_id=YP_009169229.1] [location=81821..82255]	66.667	87	0	0
>lcl|NC_027997.1_cds_YP_009169230.1_96 [gene=APL47_gp096] [protein=hypothetical protein] [protein_id=YP_009169230.1] [location=82352..82801]	93.289	99	0	0
>lcl|NC_027997.1_cds_YP_009169231.1_97 [gene=APL47_gp097] [protein=hypothetical protein] [protein_id=YP_009169231.1] [location=82816..83052]	93.506	97	0	0
>lcl|NC_027997.1_cds_YP_009169232.1_98 [gene=APL47_gp098] [protein=hypothetical protein] [protein_id=YP_009169232.1] [location=83052..83717]	94.931	98	0	0
>lcl|NC_027997.1_cds_YP_009169233.1_99 [gene=APL47_gp099] [protein=hypothetical phage protein (Radical SAM family)] [protein_id=YP_009169233.1] [location=83807..84766]	27.642	37	24.837	42
>lcl|NC_027997.1_cds_YP_009169234.1_100 [gene=APL47_gp100] [protein=hypothetical protein] [protein_id=YP_009169234.1] [location=84809..85975]	96.891	99	0	0
>lcl|NC_027997.1_cds_YP_009169235.1_101 [gene=APL47_gp101] [protein=hypothetical protein] [protein_id=YP_009169235.1] [location=86031..88502]	37.069	14	42.683	9
>lcl|NC_027997.1_cds_YP_009169236.1_102 [gene=APL47_gp102] [protein=hypothetical protein] [protein_id=YP_009169236.1] [location=88641..89069]	53.333	21	0	0
>lcl|NC_027997.1_cds_YP_009169237.1_103 [gene=APL47_gp103] [protein=hypothetical protein] [protein_id=YP_009169237.1] [location=89148..90662]	37.931	21	0	0
>lcl|NC_027997.1_cds_YP_009169238.1_104 [gene=APL47_gp104] [protein=hypothetical protein] [protein_id=YP_009169238.1] [location=complement(90794..92545)]	40.278	12	0	0
>lcl|NC_027997.1_cds_YP_009169239.1_105 [gene=APL47_gp105] [protein=hypothetical protein] [protein_id=YP_009169239.1] [location=92629..93237]	95.545	99	32.653	85
>lcl|NC_027997.1_cds_YP_009169240.1_106 [gene=APL47_gp106] [protein=hypothetical protein] [protein_id=YP_009169240.1] [location=93237..93974]	82.4	99	0	0
>lcl|NC_027997.1_cds_YP_009169241.1_107 [gene=APL47_gp107] [protein=hypothetical protein] [protein_id=YP_009169241.1] [location=94141..94302]	90.566	98	0	0
>lcl|NC_027997.1_cds_YP_009169242.1_108 [gene=APL47_gp108] [protein=hypothetical protein] [protein_id=YP_009169242.1] [location=94342..96429]	93.431	20	0	0
>lcl|NC_027997.1_cds_YP_009169243.1_109 [gene=APL47_gp109] [protein=hypothetical phage membrane protein] [protein_id=YP_009169243.1] [location=complement(96426..97208)]	96.703	35	0	0
>lcl|NC_027997.1_cds_YP_009169244.1_110 [gene=APL47_gp110] [protein=hypothetical phage membrane protein] [protein_id=YP_009169244.1] [location=98700..99062]	94.393	88	0	0
>lcl|NC_027997.1_cds_YP_009169245.1_111 [gene=APL47_gp111] [protein=hypothetical phage lipoprotein] [protein_id=YP_009169245.1] [location=99072..99350]	90.123	87	0	0
>lcl|NC_027997.1_cds_YP_009169246.1_112 [gene=APL47_gp112] [protein=hypothetical protein] [protein_id=YP_009169246.1] [location=99347..100090]	91.093	99	0	0
>lcl|NC_027997.1_cds_YP_009169247.1_113 [gene=APL47_gp113] [protein=hypothetical protein] [protein_id=YP_009169247.1] [location=100090..100368]	91.304	25	0	0
>lcl|NC_027997.1_cds_YP_009169248.1_114 [gene=APL47_gp114] [protein=hypothetical protein] [protein_id=YP_009169248.1] [location=100966..101625]	92.694	99	29.032	80
>lcl|NC_027997.1_cds_YP_009169249.1_115 [gene=APL47_gp115] [protein=Possible phage DNA polymerase] [protein_id=YP_009169249.1] [location=101756..104404]	96.078	6	30.263	92
>lcl|NC_027997.1_cds_YP_009169250.1_116 [gene=APL47_gp116] [protein=hypothetical protein] [protein_id=YP_009169250.1] [location=104682..105413]	96.774	13	0	0
>lcl|NC_027997.1_cds_YP_009169251.1_117 [gene=APL47_gp117] [protein=hypothetical protein] [protein_id=YP_009169251.1] [location=105445..106047]	97.674	21	0	0
>lcl|NC_027997.1_cds_YP_009169252.1_118 [gene=APL47_gp118] [protein=Possible phage neck protein] [protein_id=YP_009169252.1] [location=106047..106754]	30.29	97	30.705	97
>lcl|NC_027997.1_cds_YP_009169253.1_119 [gene=APL47_gp119] [protein=hypothetical protein] [protein_id=YP_009169253.1] [location=106817..107140]	98.113	98	0	0
>lcl|NC_027997.1_cds_YP_009169254.1_120 [gene=APL47_gp120] [protein=hypothetical protein] [protein_id=YP_009169254.1] [location=107127..107801]	97.351	67	0	0
>lcl|NC_027997.1_cds_YP_009169255.1_121 [gene=APL47_gp121] [protein=hypothetical protein] [protein_id=YP_009169255.1] [location=107921..108232]	96.117	99	0	0
>lcl|NC_027997.1_cds_YP_009169256.1_122 [gene=APL47_gp122] [protein=Possible sliding clamp] [protein_id=YP_009169256.1] [location=108229..108921]	100	84	29.268	68
>lcl|NC_027997.1_cds_YP_009169257.1_123 [gene=APL47_gp123] [protein=hypothetical protein] [protein_id=YP_009169257.1] [location=108965..109396]	98.601	99	0	0
>lcl|NC_027997.1_cds_YP_009169258.1_124 [gene=APL47_gp124] [protein=hypothetical protein] [protein_id=YP_009169258.1] [location=109406..110185]	93.902	95	29.843	73
>lcl|NC_027997.1_cds_YP_009169259.1_125 [gene=APL47_gp125] [protein=Possible phage ATP-dependent primase-helicase] [protein_id=YP_009169259.1] [location=110339..111676]	29.257	93	32.243	94
>lcl|NC_027997.1_cds_YP_009169260.1_126 [gene=APL47_gp194] [protein=hypothetical protein] [protein_id=YP_009169260.1] [location=112245..112667]	94.595	26	0	0
>lcl|NC_027997.1_cds_YP_009169261.1_127 [gene=APL47_gp193] [protein=hypothetical protein] [protein_id=YP_009169261.1] [location=complement(112837..113454)]	58.571	99	58.095	99
>lcl|NC_027997.1_cds_YP_009169262.1_128 [gene=APL47_gp192] [protein=hypothetical protein] [protein_id=YP_009169262.1] [location=complement(113455..115185)]	51.351	6	36.486	13
>lcl|NC_027997.1_cds_YP_009169263.1_129 [gene=APL47_gp191] [protein=hypothetical protein] [protein_id=YP_009169263.1] [location=complement(115195..115458)]	94.186	98	0	0
>lcl|NC_027997.1_cds_YP_009169264.1_130 [gene=APL47_gp190] [protein=hypothetical protein] [protein_id=YP_009169264.1] [location=complement(115480..116169)]	25.893	41	25.893	41
>lcl|NC_027997.1_cds_YP_009169265.1_131 [gene=APL47_gp189] [protein=hypothetical protein] [protein_id=YP_009169265.1] [location=116257..116886]	83.732	99	0	0
>lcl|NC_027997.1_cds_YP_009169266.1_132 [gene=APL47_gp188] [protein=hypothetical protein] [protein_id=YP_009169266.1] [location=117020..117508]	100	99	0	0
>lcl|NC_027997.1_cds_YP_009169267.1_133 [gene=APL47_gp187] [protein=hypothetical protein] [protein_id=YP_009169267.1] [location=117567..117815]	92.857	84	0	0
>lcl|NC_027997.1_cds_YP_009169268.1_134 [gene=APL47_gp186] [protein=Probable phage ribonucleotide-diphosphate reductase alpha subunit] [protein_id=YP_009169268.1] [location=118032..120728]	28.283	10	36.045	68
>lcl|NC_027997.1_cds_YP_009169269.1_135 [gene=APL47_gp185] [protein=hypothetical protein] [protein_id=YP_009169269.1] [location=120850..121527]	93.75	14	0	0
>lcl|NC_027997.1_cds_YP_009169270.1_136 [gene=APL47_gp184] [protein=hypothetical protein] [protein_id=YP_009169270.1] [location=121565..122395]	97.826	99	0	0
>lcl|NC_027997.1_cds_YP_009169271.1_137 [gene=APL47_gp183] [protein=hypothetical phage protein (Radical SAM family)] [protein_id=YP_009169271.1] [location=122422..123342]	26.087	36	0	0
>lcl|NC_027997.1_cds_YP_009169272.1_138 [gene=APL47_gp182] [protein=ISCaje3 transposase] [protein_id=YP_009169272.1] [location=complement(123446..124654)]	87.234	23	32.316	95
>lcl|NC_027997.1_cds_YP_009169273.1_139 [gene=APL47_gp181] [protein=hypothetical protein] [protein_id=YP_009169273.1] [location=125073..125612]	80.447	99	0	0
>lcl|NC_027997.1_cds_YP_009169274.1_140 [gene=APL47_gp180] [protein=hypothetical phage membrane protein] [protein_id=YP_009169274.1] [location=125633..125884]	95.833	86	0	0
>lcl|NC_027997.1_cds_YP_009169275.1_141 [gene=APL47_gp179] [protein=hypothetical protein] [protein_id=YP_009169275.1] [location=125899..126195]	91.176	34	0	0
>lcl|NC_027997.1_cds_YP_009169276.1_142 [gene=APL47_gp178] [protein=hypothetical protein] [protein_id=YP_009169276.1] [location=complement(126275..127189)]	25	72	0	0
>lcl|NC_027997.1_cds_YP_009169277.1_143 [gene=APL47_gp177] [protein=hypothetical protein] [protein_id=YP_009169277.1] [location=127449..127889]	90.977	90	0	0
>lcl|NC_027997.1_cds_YP_009169278.1_144 [gene=APL47_gp176] [protein=hypothetical protein] [protein_id=YP_009169278.1] [location=127908..128162]	92.157	60	0	0
>lcl|NC_027997.1_cds_YP_009169279.1_145 [gene=APL47_gp175] [protein=putative IS200/IS605 family transposase TnpA] [protein_id=YP_009169279.1] [location=128193..128435]	40.541	91	42.667	91
>lcl|NC_027997.1_cds_YP_009169280.1_146 [gene=APL47_gp174] [protein=ISCaje4 transposase TnpB] [protein_id=YP_009169280.1] [location=128432..129829]	90.476	9	0	0
>lcl|NC_027997.1_cds_YP_009169281.1_147 [gene=APL47_gp173] [protein=hypothetical protein] [protein_id=YP_009169281.1] [location=129886..130599]	29.583	94	29.583	94
>lcl|NC_027997.1_cds_YP_009169282.1_148 [gene=uvsW] [protein=Probable phage ATP-dependent DNA/RNA helicase (uvsW)] [protein_id=YP_009169282.1] [location=130572..131990]	36.744	84	36.977	84
>lcl|NC_027997.1_cds_YP_009169283.1_149 [gene=APL47_gp171] [protein=hypothetical protein] [protein_id=YP_009169283.1] [location=132290..132718]	98.438	45	0	0
>lcl|NC_027997.1_cds_YP_009169284.1_150 [gene=APL47_gp170] [protein=hypothetical protein] [protein_id=YP_009169284.1] [location=132729..133457]	86.869	81	0	0
>lcl|NC_027997.1_cds_YP_009169285.1_151 [gene=APL47_gp169] [protein=Possible DNA topoisomerase (medium subunit)] [protein_id=YP_009169285.1] [location=133519..134847]	98.276	13	30.415	95
>lcl|NC_027997.1_cds_YP_009169286.1_152 [gene=APL47_gp168] [protein=Probable phage ClpP protease] [protein_id=YP_009169286.1] [location=134874..135761]	95.935	83	32.061	44
>lcl|NC_027997.1_cds_YP_009169287.1_153 [gene=APL47_gp167] [protein=hypothetical protein] [protein_id=YP_009169287.1] [location=135834..138020]	95.745	6	25.658	80
>lcl|NC_027997.1_cds_YP_009169288.1_154 [gene=APL47_gp166] [protein=hypothetical protein] [protein_id=YP_009169288.1] [location=138106..138531]	71.429	35	0	0
>lcl|NC_027997.1_cds_YP_009169289.1_155 [gene=APL47_gp165] [protein=hypothetical protein] [protein_id=YP_009169289.1] [location=138565..139104]	96	42	25.824	91
>lcl|NC_027997.1_cds_YP_009169290.1_156 [gene=APL47_gp164] [protein=hypothetical protein] [protein_id=YP_009169290.1] [location=139123..139308]	98.361	98	0	0
>lcl|NC_027997.1_cds_YP_009169291.1_157 [gene=APL47_gp163] [protein=hypothetical phage protein (Radical SAM family)] [protein_id=YP_009169291.1] [location=139333..140349]	30.108	25	28.777	39
>lcl|NC_027997.1_cds_YP_009169292.1_158 [gene=APL47_gp162] [protein=hypothetical protein] [protein_id=YP_009169292.1] [location=140449..140997]	49.701	90	50.299	90
>lcl|NC_027997.1_cds_YP_009169293.1_159 [gene=APL47_gp161] [protein=hypothetical protein] [protein_id=YP_009169293.1] [location=142024..142452]	100	99	0	0
>lcl|NC_027997.1_cds_YP_009169294.1_160 [gene=APL47_gp160] [protein=hypothetical protein] [protein_id=YP_009169294.1] [location=142679..144403]	100	99	0	0
>lcl|NC_027997.1_cds_YP_009169295.1_161 [gene=APL47_gp159] [protein=hypothetical protein] [protein_id=YP_009169295.1] [location=144858..145730]	83.806	85	0	0
>lcl|NC_027997.1_cds_YP_009169296.1_162 [gene=APL47_gp158] [protein=hypothetical protein] [protein_id=YP_009169296.1] [location=145890..146798]	92.715	99	27.419	75
>lcl|NC_027997.1_cds_YP_009169297.1_163 [gene=APL47_gp157] [protein=hypothetical protein] [protein_id=YP_009169297.1] [location=146836..147408]	94.737	99	0	0
>lcl|NC_027997.1_cds_YP_009169298.1_164 [gene=APL47_gp156] [protein=hypothetical protein] [protein_id=YP_009169298.1] [location=147445..147990]	98.895	99	0	0
>lcl|NC_027997.1_cds_YP_009169299.1_165 [gene=APL47_gp155] [protein=hypothetical protein] [protein_id=YP_009169299.1] [location=148057..148695]	49.537	97	49.537	97
>lcl|NC_027997.1_cds_YP_009169300.1_166 [gene=APL47_gp154] [protein=hypothetical protein] [protein_id=YP_009169300.1] [location=148739..149050]	72.222	66	0	0
>lcl|NC_027997.1_cds_YP_009169301.1_167 [gene=APL47_gp153] [protein=hypothetical protein] [protein_id=YP_009169301.1] [location=149076..149186]	88.889	73	0	0
>lcl|NC_027997.1_cds_YP_009169302.1_168 [gene=NrdB] [protein=Probable ribonucleotide reductase (small subunit)] [protein_id=YP_009169302.1] [location=149267..150376]	29.888	95	37.166	97
>lcl|NC_027997.1_cds_YP_009169303.1_169 [gene=APL47_gp151] [protein=hypothetical protein] [protein_id=YP_009169303.1] [location=150523..150930]	92.308	57	0	0
>lcl|NC_027997.1_cds_YP_009169304.1_170 [gene=APL47_gp150] [protein=hypothetical protein] [protein_id=YP_009169304.1] [location=complement(151000..152148)]	94.595	10	23.392	86
>lcl|NC_027997.1_cds_YP_009169305.1_171 [gene=APL47_gp149] [protein=hypothetical protein] [protein_id=YP_009169305.1] [location=complement(152148..152843)]	32.121	71	33.333	71
>lcl|NC_027997.1_cds_YP_009169306.1_172 [gene=APL47_gp148] [protein=hypothetical protein] [protein_id=YP_009169306.1] [location=152909..155776]	43.548	6	96.634	53
>lcl|NC_027997.1_cds_YP_009169307.1_173 [gene=APL47_gp147] [protein=hypothetical protein] [protein_id=YP_009169307.1] [location=155795..155923]	100	44	0	0
>lcl|NC_027997.1_cds_YP_009169308.1_174 [gene=APL47_gp146] [protein=Possible phage tail sheath completion protein] [protein_id=YP_009169308.1] [location=156076..157446]	31.12	52	31.12	52
>lcl|NC_027997.1_cds_YP_009169309.1_175 [gene=APL47_gp145] [protein=Possible phage tail tube protein] [protein_id=YP_009169309.1] [location=157455..158207]	19	80	25.561	85
>lcl|NC_027997.1_cds_YP_009169310.1_176 [gene=APL47_gp144] [protein=hypothetical protein] [protein_id=YP_009169310.1] [location=158389..158895]	31.034	80	31.724	80
>lcl|NC_027997.1_cds_YP_009169311.1_177 [gene=APL47_gp143] [protein=Probable phage ssDNA binding protein] [protein_id=YP_009169311.1] [location=159076..159996]	39.224	74	38.793	74
>lcl|NC_027997.1_cds_YP_009169312.1_178 [gene=APL47_gp142] [protein=hypothetical protein] [protein_id=YP_009169312.1] [location=160037..160309]	27.66	97	29.787	97
>lcl|NC_027997.1_cds_YP_009169313.1_179 [gene=APL47_gp141] [protein=hypothetical protein] [protein_id=YP_009169313.1] [location=160309..160770]	82.456	99	0	0
>lcl|NC_027997.1_cds_YP_009169314.1_180 [gene=APL47_gp140] [protein=hypothetical protein] [protein_id=YP_009169314.1] [location=160932..162536]	94.007	99	0	0
>lcl|NC_027997.1_cds_YP_009169315.1_181 [gene=APL47_gp139] [protein=Probable phage RNA ligase] [protein_id=YP_009169315.1] [location=162697..163782]	94.286	29	45.981	83
>lcl|NC_027997.1_cds_YP_009169316.1_182 [gene=APL47_gp138] [protein=hypothetical protein] [protein_id=YP_009169316.1] [location=163869..164282]	92.701	99	0	0
>lcl|NC_027997.1_cds_YP_009169317.1_183 [gene=APL47_gp137] [protein=hypothetical protein] [protein_id=YP_009169317.1] [location=164292..164642]	87.342	68	0	0
>lcl|NC_027997.1_cds_YP_009169318.1_184 [gene=APL47_gp136] [protein=hypothetical phage protein (Radical SAM family)] [protein_id=YP_009169318.1] [location=164742..165911]	99.13	29	0	0
>lcl|NC_027997.1_cds_YP_009169319.1_185 [gene=APL47_gp135] [protein=hypothetical phage membrane protein] [protein_id=YP_009169319.1] [location=166007..169486]	88.095	4	41.053	8
>lcl|NC_027997.1_cds_YP_009169320.1_186 [gene=APL47_gp134] [protein=hypothetical phage protein (possible baseplate tail tube cap)] [protein_id=YP_009169320.1] [location=169514..170446]	97.51	77	28.906	37
>lcl|NC_027997.1_cds_YP_009169321.1_187 [gene=APL47_gp133] [protein=hypothetical protein] [protein_id=YP_009169321.1] [location=170455..170946]	96.319	99	0	0
>lcl|NC_027997.1_cds_YP_009169322.1_188 [gene=APL47_gp132] [protein=Probable phage tail completion and stabilizer protein] [protein_id=YP_009169322.1] [location=173272..173775]	28.571	82	30	82
>lcl|NC_027997.1_cds_YP_009169323.1_189 [gene=APL47_gp131] [protein=hypothetical protein] [protein_id=YP_009169323.1] [location=173785..174204]	33.962	73	33.962	73
>lcl|NC_027997.1_cds_YP_009169324.1_190 [gene=APL47_gp130] [protein=hypothetical protein] [protein_id=YP_009169324.1] [location=174403..175596]	94.488	32	0	0
>lcl|NC_027997.1_cds_YP_009169325.1_191 [gene=APL47_gp129] [protein=hypothetical protein] [protein_id=YP_009169325.1] [location=175674..176186]	97.674	25	57.988	99
>lcl|NC_027997.1_cds_YP_009169326.1_192 [gene=APL47_gp128] [protein=hypothetical protein] [protein_id=YP_009169326.1] [location=176195..176509]	69.231	25	0	0
>lcl|NC_027997.1_cds_YP_009169327.1_193 [gene=APL47_gp127] [protein=Probable phage prohead core protein precursor] [protein_id=YP_009169327.1] [location=176537..177247]	48.045	72	48.045	72
>lcl|NC_027997.1_cds_YP_009169328.1_194 [gene=APL47_gp126] [protein=hypothetical protein] [protein_id=YP_009169328.1] [location=177269..177475]	82.353	99	0	0
NC_005282
>lcl|NC_005282.1_cds_NP_944777.1_1 [gene=rIIA] [protein=rIIA protein] [protein_id=NP_944777.1] [location=1..2292]	33.836	98	98.296	99
>lcl|NC_005282.1_cds_NP_944778.1_2 [gene=rIIB] [protein=rIIB protein] [protein_id=NP_944778.1] [location=2372..3481]	68.317	27	98.103	99
>lcl|NC_005282.1_cds_NP_944779.1_3 [gene=Felix01p003] [protein=Phage conserved protein] [protein_id=NP_944779.1] [location=3582..4130]	100	10	100	99
>lcl|NC_005282.1_cds_NP_944782.1_4 [gene=Felix01p006] [protein=hypothetical protein] [protein_id=NP_944782.1] [location=4108..4803]	34.228	62	100	99
>lcl|NC_005282.1_cds_NP_944787.1_5 [gene=Felix01p011] [protein=hypothetical protein] [protein_id=NP_944787.1] [location=4814..5278]	98.182	35	100	99
>lcl|NC_005282.1_cds_NP_944790.1_6 [gene=Felix01p014] [protein=Phage conserved protein] [protein_id=NP_944790.1] [location=5331..5678]	27.273	84	100	99
>lcl|NC_005282.1_cds_NP_944791.1_7 [gene=Felix01p015] [protein=hypothetical protein] [protein_id=NP_944791.1] [location=5572..5841]	41.463	46	96.923	72
>lcl|NC_005282.1_cds_NP_944792.1_8 [gene=Felix01p016] [protein=hypothetical protein] [protein_id=NP_944792.1] [location=5838..6107]	95.506	99	95.506	99
>lcl|NC_005282.1_cds_NP_944793.2_9 [gene=Felix01p017] [protein=hypothetical protein] [protein_id=NP_944793.2] [location=6110..6418]	98.02	98	41.414	89
>lcl|NC_005282.1_cds_NP_944795.1_10 [gene=Felix01p019] [protein=hypothetical protein] [protein_id=NP_944795.1] [location=6408..6734]	100	50	95.37	99
>lcl|NC_005282.1_cds_NP_944797.1_11 [gene=Felix01p021] [protein=hypothetical protein] [protein_id=NP_944797.1] [location=6709..6936]	96.429	37	86.667	99
>lcl|NC_005282.1_cds_NP_944800.1_12 [gene=Felix01p024] [protein=Phage conserved protein] [protein_id=NP_944800.1] [location=6929..7129]	95.833	36	98.485	99
>lcl|NC_005282.1_cds_NP_944801.1_13 [gene=Felix01p025] [protein=Phage conserved protein] [protein_id=NP_944801.1] [location=7130..7915]	30.909	58	92.72	99
>lcl|NC_005282.1_cds_NP_944804.1_14 [gene=Felix01p028] [protein=hypothetical protein] [protein_id=NP_944804.1] [location=8042..8254]	92.308	37	0	0
>lcl|NC_005282.1_cds_NP_944806.1_15 [gene=Felix01p030] [protein=hypothetical protein] [protein_id=NP_944806.1] [location=8423..8629]	100	99	95.588	99
>lcl|NC_005282.1_cds_NP_944808.1_16 [gene=Felix01p032] [protein=hypothetical protein] [protein_id=NP_944808.1] [location=8717..9229]	100	37	98.824	99
>lcl|NC_005282.1_cds_NP_944810.1_17 [gene=Felix01p034] [protein=hypothetical protein] [protein_id=NP_944810.1] [location=9316..9612]	34.091	89	98.98	99
>lcl|NC_005282.1_cds_NP_944811.1_18 [gene=Felix01p035] [protein=hypothetical protein] [protein_id=NP_944811.1] [location=9606..9938]	100	14	99.091	99
>lcl|NC_005282.1_cds_NP_944813.1_19 [gene=Felix01p037] [protein=hypothetical protein] [protein_id=NP_944813.1] [location=9983..10300]	95	19	92.222	85
>lcl|NC_005282.1_cds_NP_944817.1_20 [gene=Felix01p041] [protein=hypothetical protein] [protein_id=NP_944817.1] [location=10387..10791]	100	24	95.522	99
>lcl|NC_005282.1_cds_NP_944820.1_21 [gene=Felix01p044] [protein=hypothetical protein] [protein_id=NP_944820.1] [location=10895..11236]	76.923	34	100	99
>lcl|NC_005282.1_cds_NP_944822.1_22 [gene=Felix01p046] [protein=hypothetical protein] [protein_id=NP_944822.1] [location=11459..11989]	32.283	71	99.432	99
>lcl|NC_005282.1_cds_NP_944825.1_23 [gene=Felix01p049] [protein=hypothetical protein] [protein_id=NP_944825.1] [location=12057..12305]	57.317	99	100	99
>lcl|NC_005282.1_cds_NP_944826.2_24 [gene=Felix01p050] [protein=hypothetical protein] [protein_id=NP_944826.2] [location=complement(13928..14476)]	100	60	98.352	99
>lcl|NC_005282.1_cds_NP_944827.1_25 [gene=Felix01p051] [protein=hypothetical protein] [protein_id=NP_944827.1] [location=complement(14490..14954)]	83.117	99	94.805	99
>lcl|NC_005282.1_cds_NP_944828.1_26 [gene=Felix01p052] [protein=hypothetical protein] [protein_id=NP_944828.1] [location=complement(15008..15232)]	97.826	61	97.826	61
>lcl|NC_005282.1_cds_NP_944829.2_27 [gene=Felix01p053] [protein=hypothetical membrane protein] [protein_id=NP_944829.2] [location=complement(15309..15812)]	100	10	93.413	99
>lcl|NC_005282.1_cds_NP_944832.1_28 [gene=Felix01p056] [protein=hypothetical protein] [protein_id=NP_944832.1] [location=complement(15809..16027)]	100	38	100	99
>lcl|NC_005282.1_cds_NP_944833.1_29 [gene=Felix01p057] [protein=hypothetical protein] [protein_id=NP_944833.1] [location=complement(16024..16569)]	96.774	17	87.845	99
>lcl|NC_005282.1_cds_NP_944836.1_30 [gene=Felix01p060] [protein=hypothetical protein] [protein_id=NP_944836.1] [location=complement(16642..17223)]	20.787	79	97.409	99
>lcl|NC_005282.1_cds_NP_944838.1_31 [gene=Felix01p062] [protein=hypothetical protein] [protein_id=NP_944838.1] [location=complement(17223..17567)]	100	31	98.246	99
>lcl|NC_005282.1_cds_NP_944840.1_32 [gene=Felix01p064] [protein=hypothetical protein] [protein_id=NP_944840.1] [location=complement(17560..17853)]	100	50	98.969	99
>lcl|NC_005282.1_cds_NP_944842.1_33 [gene=Felix01p066] [protein=hypothetical protein] [protein_id=NP_944842.1] [location=complement(17853..18248)]	98.276	44	99.237	99
>lcl|NC_005282.1_cds_NP_944844.1_34 [gene=Felix01p068] [protein=hypothetical protein] [protein_id=NP_944844.1] [location=complement(18241..18639)]	98.214	42	99.242	99
>lcl|NC_005282.1_cds_NP_944846.1_35 [gene=p13] [protein=Lysin (lysozyme)] [protein_id=NP_944846.1] [location=complement(18691..19155)]	44.231	98	99.351	99
>lcl|NC_005282.1_cds_NP_944848.1_36 [gene=12] [protein=Putative tail protein] [protein_id=NP_944848.1] [location=complement(19155..20039)]	37.624	34	96.939	99
>lcl|NC_005282.1_cds_NP_944851.1_37 [protein=hypothetical protein] [protein_id=NP_944851.1] [location=complement(20036..20407)]	35.955	70	100	99
>lcl|NC_005282.1_cds_NP_944853.1_38 [gene=Felix01p075] [protein=hypothetical protein] [protein_id=NP_944853.1] [location=complement(20455..21045)]	27.604	91	100	99
>lcl|NC_005282.1_cds_NP_944854.1_39 [gene=Felix01p076] [protein=hypothetical protein] [protein_id=NP_944854.1] [location=complement(21039..21272)]	98.701	99	100	99
>lcl|NC_005282.1_cds_YP_001504372.1_40 [gene=Felix01p077] [protein=hypothetical protein] [protein_id=YP_001504372.1] [location=complement(21254..21415)]	100	98	100	98
>lcl|NC_005282.1_cds_NP_944856.1_41 [gene=Felix01p078] [protein=Phage conserved protein] [protein_id=NP_944856.1] [location=21665..22036]	58.475	95	100	99
>lcl|NC_005282.1_cds_NP_944857.1_42 [gene=Felix01p079] [protein=Phage conserved protein] [protein_id=NP_944857.1] [location=22118..23533]	99.048	22	99.575	99
>lcl|NC_005282.1_cds_NP_944860.1_43 [gene=Felix01p082] [protein=hypothetical protein] [protein_id=NP_944860.1] [location=complement(24573..24803)]	87.324	92	0	0
>lcl|NC_005282.1_cds_NP_944863.2_44 [gene=Felix01p085] [protein=HNH endonuclease] [protein_id=NP_944863.2] [location=25030..25515]	95	12	42.222	55
>lcl|NC_005282.1_cds_NP_944866.1_45 [gene=Felix01p088] [protein=HNH endonuclease] [protein_id=NP_944866.1] [location=26003..26395]	46.479	53	43.902	63
>lcl|NC_005282.1_cds_NP_944868.1_46 [gene=Felix01p090] [protein=hypothetical protein] [protein_id=NP_944868.1] [location=26690..26887]	96	38	0	0
>lcl|NC_005282.1_cds_NP_944871.1_47 [gene=Felix01p093] [protein=Phage conserved protein; putative endonuclease VII] [protein_id=NP_944871.1] [location=27313..27726]	100	12	85.401	99
>lcl|NC_005282.1_cds_NP_944875.1_48 [gene=Felix01p097] [protein=Phage conserved protein] [protein_id=NP_944875.1] [location=28262..28819]	100	18	97.838	99
>lcl|NC_005282.1_cds_NP_944879.1_49 [protein=hypothetical protein] [protein_id=NP_944879.1] [location=29271..30005]	100	17	96.721	99
>lcl|NC_005282.1_cds_NP_944880.1_50 [gene=Felix01p101] [protein=hypothetical protein] [protein_id=NP_944880.1] [location=30069..30296]	100	74	0	0
>lcl|NC_005282.1_cds_NP_944882.1_51 [gene=Felix01p103] [protein=hypothetical protein] [protein_id=NP_944882.1] [location=30403..30603]	98.485	99	100	99
>lcl|NC_005282.1_cds_NP_944884.1_52 [gene=Felix01p105] [protein=Terminase	large subunit] [protein_id=NP_944884.1] [location=30625..32226]	41.151	84	99.812	99
>lcl|NC_005282.1_cds_NP_944885.2_53 [gene=Felix01p106] [protein=Phage conserved protein] [protein_id=NP_944885.2] [location=32243..33709]	38.889	99	99.795	99
>lcl|NC_005282.1_cds_NP_944886.1_54 [gene=Felix01p107] [protein=hypothetical protein] [protein_id=NP_944886.1] [location=33709..34209]	35.119	99	98.193	99
>lcl|NC_005282.1_cds_NP_944887.1_55 [gene=Felix01p108] [protein=hypothetical protein] [protein_id=NP_944887.1] [location=34209..34541]	46.512	77	100	99
>lcl|NC_005282.1_cds_NP_944888.1_56 [gene=Felix01p109] [protein=Putative head maturation protease] [protein_id=NP_944888.1] [location=34553..35899]	44.396	99	100	99
>lcl|NC_005282.1_cds_NP_944890.1_57 [gene=Felix01p111] [protein=hypothetical protein] [protein_id=NP_944890.1] [location=35911..36288]	90.196	40	93.6	99
>lcl|NC_005282.1_cds_NP_944891.1_58 [gene=Felix01p112] [protein=major capsid protein] [protein_id=NP_944891.1] [location=36322..37428]	28.814	95	98.641	99
>lcl|NC_005282.1_cds_NP_944892.1_59 [gene=Felix01p113] [protein=hypothetical protein] [protein_id=NP_944892.1] [location=37449..37898]	28.369	91	100	99
>lcl|NC_005282.1_cds_NP_944893.1_60 [gene=Felix01p114] [protein=Phage conserved protein] [protein_id=NP_944893.1] [location=37898..38380]	52.174	99	99.375	99
>lcl|NC_005282.1_cds_NP_944894.1_61 [gene=Felix01p115] [protein=hypothetical protein] [protein_id=NP_944894.1] [location=38377..38778]	54.198	98	99.248	99
>lcl|NC_005282.1_cds_NP_944895.1_62 [gene=Felix01p116] [protein=hypothetical protein] [protein_id=NP_944895.1] [location=38753..39352]	98.824	43	100	99
>lcl|NC_005282.1_cds_NP_944896.1_63 [gene=Felix01p117] [protein=Phage conserved structural protein] [protein_id=NP_944896.1] [location=39353..40705]	51.012	55	99.111	99
>lcl|NC_005282.1_cds_NP_944897.1_64 [gene=Felix01p118] [protein=Phage conserved protein] [protein_id=NP_944897.1] [location=40721..41167]	29.861	91	100	99
>lcl|NC_005282.1_cds_NP_944899.1_65 [gene=Felix01p120] [protein=hypothetical protein] [protein_id=NP_944899.1] [location=41241..41639]	97.872	35	98.485	99
>lcl|NC_005282.1_cds_NP_944900.1_66 [gene=Felix01p121] [protein=hypothetical protein] [protein_id=NP_944900.1] [location=41642..41881]	54.286	43	100	99
>lcl|NC_005282.1_cds_NP_944901.1_67 [gene=Felix01p122] [protein=Phage conserved protein] [protein_id=NP_944901.1] [location=41881..44109]	100	4	98.787	99
>lcl|NC_005282.1_cds_NP_944906.1_68 [gene=Felix01p127] [protein=Phage conserved protein] [protein_id=NP_944906.1] [location=44109..44906]	100	13	100	99
>lcl|NC_005282.1_cds_NP_944909.1_69 [gene=Felix01p130] [protein=hypothetical protein] [protein_id=NP_944909.1] [location=44906..45247]	57.426	89	100	99
>lcl|NC_005282.1_cds_NP_944910.1_70 [gene=Felix01p131] [protein=hypothetical protein] [protein_id=NP_944910.1] [location=45247..46224]	100	20	100	99
>lcl|NC_005282.1_cds_NP_944912.1_71 [gene=Felix01p133] [protein=putative baseplate protein] [protein_id=NP_944912.1] [location=46224..46847]	100	29	100	99
>lcl|NC_005282.1_cds_NP_944914.1_72 [gene=Felix01p135] [protein=Phage conserved protein] [protein_id=NP_944914.1] [location=46847..47266]	56.452	88	100	99
>lcl|NC_005282.1_cds_NP_944915.1_73 [gene=Felix01p136] [protein=Phage conserved protein] [protein_id=NP_944915.1] [location=47266..48735]	100	7	98.773	99
>lcl|NC_005282.1_cds_NP_944918.1_74 [gene=Felix01p139] [protein=hypothetical protein] [protein_id=NP_944918.1] [location=48738..49595]	94.737	7	98.596	99
>lcl|NC_005282.1_cds_NP_944920.1_75 [gene=Felix01p141] [protein=hypothetical protein] [protein_id=NP_944920.1] [location=49595..49897]	51.648	77	100	99
>lcl|NC_005282.1_cds_NP_944921.1_76 [gene=Felix01p142] [protein=Putative tail fiber protein GP37] [protein_id=NP_944921.1] [location=49900..51066]	100	5	98.969	99
>lcl|NC_005282.1_cds_NP_944923.1_77 [gene=Felix01p144] [protein=Putative tail fiber protein] [protein_id=NP_944923.1] [location=51117..53465]	32.308	8	74.63	60
>lcl|NC_005282.1_cds_NP_944925.1_78 [gene=Felix01p146] [protein=Phage conserved protein] [protein_id=NP_944925.1] [location=53545..53739]	48.333	92	100	98
>lcl|NC_005282.1_cds_NP_944927.1_79 [gene=Felix01p148] [protein=hypothetical protein] [protein_id=NP_944927.1] [location=53740..54105]	24.771	89	99.174	99
>lcl|NC_005282.1_cds_NP_944928.1_80 [gene=td] [protein=Thymidylate synthase] [protein_id=NP_944928.1] [location=complement(54148..55047)]	44.089	99	98.997	99
>lcl|NC_005282.1_cds_NP_944929.1_81 [gene=frd] [protein=Dihydrofolate reductase] [protein_id=NP_944929.1] [location=complement(55049..55594)]	29.143	83	97.79	99
>lcl|NC_005282.1_cds_NP_944930.1_82 [protein=hypothetical protein] [protein_id=NP_944930.1] [location=complement(55591..55851)]	24.074	62	96.512	99
>lcl|NC_005282.1_cds_NP_944932.1_83 [gene=Felix01p153] [protein=hypothetical protein] [protein_id=NP_944932.1] [location=complement(55852..56367)]	100	31	99.415	99
>lcl|NC_005282.1_cds_NP_944933.1_84 [gene=Felix01p154] [protein=hypothetical protein] [protein_id=NP_944933.1] [location=complement(56381..56740)]	36.134	98	100	99
>lcl|NC_005282.1_cds_NP_944934.1_85 [gene=Felix01p155] [protein=Putative transcriptional regulatory protein] [protein_id=NP_944934.1] [location=complement(56742..57071)]	36.957	41	100	90
>lcl|NC_005282.1_cds_NP_944937.1_86 [gene=Felix01p158] [protein=hypothetical protein] [protein_id=NP_944937.1] [location=complement(57034..57246)]	100	25	100	99
>lcl|NC_005282.1_cds_NP_944938.1_87 [gene=Felix01p159] [protein=hypothetical protein] [protein_id=NP_944938.1] [location=complement(57248..57631)]	98.039	40	99.213	99
>lcl|NC_005282.1_cds_NP_944942.1_88 [gene=Felix01p163] [protein=Putative DNA ligase] [protein_id=NP_944942.1] [location=complement(57914..59014)]	100	14	89.13	99
>lcl|NC_005282.1_cds_NP_944945.1_89 [gene=Felix01p166] [protein=hypothetical protein] [protein_id=NP_944945.1] [location=complement(58989..59207)]	100	27	98.611	99
>lcl|NC_005282.1_cds_NP_944947.1_90 [gene=Felix01p168] [protein=hypothetical protein] [protein_id=NP_944947.1] [location=complement(59204..59410)]	98.113	77	100	99
>lcl|NC_005282.1_cds_NP_944949.1_91 [gene=Felix01p170] [protein=hypothetical protein] [protein_id=NP_944949.1] [location=complement(59421..59678)]	96.552	34	89.474	88
>lcl|NC_005282.1_cds_YP_001504373.1_92 [gene=FelixO1p244] [protein=hypothetical protein] [protein_id=YP_001504373.1] [location=complement(59668..59814)]	100	31	100	98
>lcl|NC_005282.1_cds_NP_944952.2_93 [gene=Felix01p173] [protein=hypothetical protein] [protein_id=NP_944952.2] [location=complement(59811..60029)]	100	62	90.278	99
>lcl|NC_005282.1_cds_NP_944953.1_94 [gene=Felix01p174] [protein=hypothetical protein] [protein_id=NP_944953.1] [location=complement(60026..60235)]	54.412	97	100	99
>lcl|NC_005282.1_cds_NP_944955.1_95 [gene=Felix01p176] [protein=Putative HNH endonuclease] [protein_id=NP_944955.1] [location=complement(60287..60790)]	35.088	65	40	92
>lcl|NC_005282.1_cds_NP_944958.1_96 [gene=Felix01p179] [protein=Putative DNA polymerase] [protein_id=NP_944958.1] [location=complement(60772..63492)]	22.663	37	96.078	79
>lcl|NC_005282.1_cds_NP_944959.1_97 [gene=Felix01p180] [protein=hypothetical protein] [protein_id=NP_944959.1] [location=63729..64151]	52.294	77	100	99
>lcl|NC_005282.1_cds_NP_944960.1_98 [gene=Felix01p181] [protein=hypothetical protein] [protein_id=NP_944960.1] [location=64153..64953]	97.436	15	93.233	99
>lcl|NC_005282.1_cds_NP_944963.1_99 [gene=g1] [protein=Putative deoxynucleotide monophosphate kinase] [protein_id=NP_944963.1] [location=65015..65758]	100	21	97.976	99
>lcl|NC_005282.1_cds_NP_944966.1_100 [protein=hypothetical protein] [protein_id=NP_944966.1] [location=65767..65967]	100	96	100	96
>lcl|NC_005282.1_cds_NP_944967.2_101 [gene=4A] [protein=Putative phage DNA primase/helicase] [protein_id=NP_944967.2] [location=65960..67945]	26.591	85	100	99
>lcl|NC_005282.1_cds_YP_001504374.1_102 [gene=FelixO1p246] [protein=hypothetical protein] [protein_id=YP_001504374.1] [location=67920..68201]	98.182	59	98.925	99
>lcl|NC_005282.1_cds_YP_001504375.1_103 [gene=FelixO1p245] [protein=hypothetical protein] [protein_id=YP_001504375.1] [location=68198..68347]	100	98	100	98
>lcl|NC_005282.1_cds_NP_944970.1_104 [gene=Felix01p191] [protein=hypothetical protein] [protein_id=NP_944970.1] [location=68420..69277]	98.113	19	100	92
>lcl|NC_005282.1_cds_NP_944975.1_105 [gene=6] [protein=Putative exodeoxyribonuclease] [protein_id=NP_944975.1] [location=69340..70386]	98.438	18	100	99
>lcl|NC_005282.1_cds_NP_944978.1_106 [protein=Putative HNH endonuclease] [protein_id=NP_944978.1] [location=70340..70864]	100	22	100	95
>lcl|NC_005282.1_cds_NP_944980.1_107 [gene=Felix01p201] [protein=Phage conserved protein] [protein_id=NP_944980.1] [location=70861..71361]	98.507	40	98.193	99
>lcl|NC_005282.1_cds_NP_944983.1_108 [gene=Felix01p204] [protein=hypothetical protein] [protein_id=NP_944983.1] [location=71383..71631]	94.444	87	100	99
>lcl|NC_005282.1_cds_NP_944984.1_109 [gene=Felix01p205] [protein=hypothetical protein] [protein_id=NP_944984.1] [location=71607..72362]	98.63	29	99.602	99
>lcl|NC_005282.1_cds_NP_944987.2_110 [gene=Felix01p208] [protein=hypothetical protein] [protein_id=NP_944987.2] [location=72343..72666]	38.554	75	100	99
>lcl|NC_005282.1_cds_NP_944989.1_111 [gene=Felix01p210] [protein=hypothetical protein] [protein_id=NP_944989.1] [location=72659..72997]	98.039	45	84.821	99
>lcl|NC_005282.1_cds_NP_944991.1_112 [gene=nrdA] [protein=Ribonucleoside triphosphate reductase	alpha chain] [protein_id=NP_944991.1] [location=73044..75278]	56.971	99	100	99
>lcl|NC_005282.1_cds_NP_944992.2_113 [protein=hypothetical protein] [protein_id=NP_944992.2] [location=75334..75591]	95.238	24	89.286	65
>lcl|NC_005282.1_cds_NP_944994.1_114 [gene=nrdB] [protein=Ribonucleoside triphosphate reductase	beta chain] [protein_id=NP_944994.1] [location=75588..76661]	49.857	97	100	99
>lcl|NC_005282.1_cds_NP_944996.1_115 [gene=Felix01p216] [protein=Putative phage glutaredoxin] [protein_id=NP_944996.1] [location=76661..76903]	32.895	90	98.75	99
>lcl|NC_005282.1_cds_NP_944998.1_116 [gene=Felix01p218] [protein=hypothetical membrane protein] [protein_id=NP_944998.1] [location=76896..77102]	95.588	99	97.059	99
>lcl|NC_005282.1_cds_NP_944999.1_117 [gene=nrdD] [protein=Anaerobic nucleoside diphosphate reductase] [protein_id=NP_944999.1] [location=77151..79295]	98.039	99	97.759	99
>lcl|NC_005282.1_cds_NP_945000.2_118 [gene=Felix01p220] [protein=hypothetical membrane protein] [protein_id=NP_945000.2] [location=79310..79474]	88.235	93	0	0
>lcl|NC_005282.1_cds_NP_945001.1_119 [gene=Felix01p221] [protein=hypothetical membrane protein] [protein_id=NP_945001.1] [location=79450..79650]	90.909	99	0	0
>lcl|NC_005282.1_cds_NP_945002.1_120 [gene=Felix01p222] [protein=hypothetical protein] [protein_id=NP_945002.1] [location=79647..80042]	93.13	99	92.366	99
>lcl|NC_005282.1_cds_NP_945003.1_121 [gene=nrdG] [protein=Anaerobic NTP reductase	small subunit] [protein_id=NP_945003.1] [location=80102..80587]	97.436	24	89.441	99
>lcl|NC_005282.1_cds_NP_945005.1_122 [protein=hypothetical protein] [protein_id=NP_945005.1] [location=80550..80927]	76.744	34	40	87
>lcl|NC_005282.1_cds_NP_945006.1_123 [gene=Felix01p226] [protein=hypothetical protein] [protein_id=NP_945006.1] [location=80894..81151]	95.313	74	96.875	74
>lcl|NC_005282.1_cds_NP_945007.1_124 [gene=Felix01p227] [protein=hypothetical protein] [protein_id=NP_945007.1] [location=81154..81474]	100	82	99.057	99
>lcl|NC_005282.1_cds_NP_945009.1_125 [gene=Felix01p229] [protein=hypothetical protein] [protein_id=NP_945009.1] [location=81526..82041]	40.541	42	97.661	99
>lcl|NC_005282.1_cds_NP_945013.1_126 [gene=Felix01p233] [protein=hypothetical protein] [protein_id=NP_945013.1] [location=82034..82312]	100	15	98.913	99
>lcl|NC_005282.1_cds_NP_945016.1_127 [gene=Felix01p236] [protein=Putative ribose-phosphate pyrophosphokinase] [protein_id=NP_945016.1] [location=82324..83205]	100	8	100	99
>lcl|NC_005282.1_cds_NP_945017.1_128 [gene=Felix01p237] [protein=Putative HNH endonuclease] [protein_id=NP_945017.1] [location=83214..83705]	100	23	93.252	99
>lcl|NC_005282.1_cds_NP_945019.1_129 [gene=nadV] [protein=nicotinamide phosphoribosyl transferase] [protein_id=NP_945019.1] [location=83723..85504]	100	4	98.82	99
>lcl|NC_005282.1_cds_NP_945021.1_130 [gene=Felix01p241] [protein=hypothetical protein] [protein_id=NP_945021.1] [location=85559..85894]	100	23	100	99
>lcl|NC_005282.1_cds_NP_945023.1_131 [gene=Felix01p243] [protein=hypothetical membrane protein] [protein_id=NP_945023.1] [location=85876..86052]	98.276	98	98.276	98
NC_010342
>lcl|NC_010342.1_cds_YP_001686737.1_1 [gene=HAPgp01] [protein=putative terminase small subunit] [protein_id=YP_001686737.1] [location=1..576]	51.351	19	42.308	27
>lcl|NC_010342.1_cds_YP_001686738.1_2 [gene=HAPgp02] [protein=putative terminase large subunit] [protein_id=YP_001686738.1] [location=602..2548]	61.102	98	23.328	86
>lcl|NC_010342.1_cds_YP_001686739.1_3 [gene=HAPgp03] [protein=hypothetical protein] [protein_id=YP_001686739.1] [location=2552..3067]	52.817	83	0	0
>lcl|NC_010342.1_cds_YP_001686740.1_4 [gene=HAPgp04] [protein=portal protein] [protein_id=YP_001686740.1] [location=3071..4627]	52	86	28.602	88
>lcl|NC_010342.1_cds_YP_001686741.1_5 [gene=HAPgp05] [protein=major capsid protein] [protein_id=YP_001686741.1] [location=4731..6539]	48.718	6	33.934	55
>lcl|NC_010342.1_cds_YP_001686742.1_6 [gene=HAPgp06] [protein=hypothetical protein] [protein_id=YP_001686742.1] [location=6823..7182]	38.136	98	0	0
>lcl|NC_010342.1_cds_YP_001686743.1_7 [gene=HAPgp07] [protein=hypothetical protein] [protein_id=YP_001686743.1] [location=7211..7690]	30.464	94	25.664	70
>lcl|NC_010342.1_cds_YP_001686744.1_8 [gene=HAPgp08] [protein=hypothetical protein] [protein_id=YP_001686744.1] [location=7671..8231]	51.685	95	0	0
>lcl|NC_010342.1_cds_YP_001686745.1_9 [gene=HAPgp09] [protein=putative baseplate assembly protein V] [protein_id=YP_001686745.1] [location=8240..8863]	40.244	39	35.714	54
>lcl|NC_010342.1_cds_YP_001686746.1_10 [gene=HAPgp10] [protein=putative baseplate assembly protein] [protein_id=YP_001686746.1] [location=8869..9192]	67.29	99	36.232	62
>lcl|NC_010342.1_cds_YP_001686747.1_11 [gene=J] [protein=baseplate assembly protein] [protein_id=YP_001686747.1] [location=9192..10184]	54.242	99	34.675	97
>lcl|NC_010342.1_cds_YP_001686748.1_12 [gene=HAPgp12] [protein=putative tail protein] [protein_id=YP_001686748.1] [location=10253..10906]	49.457	84	30.137	66
>lcl|NC_010342.1_cds_YP_001686749.1_13 [gene=HAPgp13] [protein=putative tail protein] [protein_id=YP_001686749.1] [location=10910..11428]	61.31	97	29.474	54
>lcl|NC_010342.1_cds_YP_001686750.1_14 [gene=HAPgp14] [protein=hypothetical protein] [protein_id=YP_001686750.1] [location=11437..11799]	49.153	97	31.746	52
>lcl|NC_010342.1_cds_YP_001686751.1_15 [gene=HAPgp15] [protein=hypothetical protein] [protein_id=YP_001686751.1] [location=11792..12139]	45.161	80	0	0
>lcl|NC_010342.1_cds_YP_001686752.1_16 [gene=HAPgp16] [protein=putative tail fiber protein] [protein_id=YP_001686752.1] [location=12148..12525]	36.154	62	49.206	49
>lcl|NC_010342.1_cds_YP_001686753.1_17 [gene=HAPgp17] [protein=hypothetical protein] [protein_id=YP_001686753.1] [location=12532..13365]	54.286	13	0	0
>lcl|NC_010342.1_cds_YP_001686754.1_18 [gene=HAPgp18] [protein=putative tail fiber assembly protein] [protein_id=YP_001686754.1] [location=13377..13856]	100	99	35.238	65
>lcl|NC_010342.1_cds_YP_001686755.1_19 [gene=HAPgp19] [protein=hypothetical protein] [protein_id=YP_001686755.1] [location=13853..14158]	100	99	0	0
>lcl|NC_010342.1_cds_YP_001686756.1_20 [gene=FI] [protein=major tail sheath protein] [protein_id=YP_001686756.1] [location=14420..15586]	65.206	99	24.242	86
>lcl|NC_010342.1_cds_YP_001686757.1_21 [gene=HAPgp21] [protein=putative tail tube protein] [protein_id=YP_001686757.1] [location=15587..16093]	43.452	99	0	0
>lcl|NC_010342.1_cds_YP_001686758.1_22 [gene=HAPgp22] [protein=hypothetical protein] [protein_id=YP_001686758.1] [location=16131..16805]	39.13	92	0	0
>lcl|NC_010342.1_cds_YP_001686759.1_23 [gene=HAPgp23] [protein=putative tail tape measure] [protein_id=YP_001686759.1] [location=16930..19515]	57.937	15	32.228	62
>lcl|NC_010342.1_cds_YP_001686760.1_24 [gene=HAPgp24] [protein=putative tail protein] [protein_id=YP_001686760.1] [location=19516..19929]	57.937	91	33.01	75
>lcl|NC_010342.1_cds_YP_001686761.1_25 [gene=D] [protein=tail protein] [protein_id=YP_001686761.1] [location=20107..21135]	54.762	98	29.747	91
>lcl|NC_010342.1_cds_YP_001686762.1_26 [gene=HAPgp26] [protein=DNA adenine methyltransferase] [protein_id=YP_001686762.1] [location=21276..22031]	72.51	99	62.598	99
>lcl|NC_010342.1_cds_YP_001686763.1_27 [gene=HAPgp27] [protein=hypothetical protein] [protein_id=YP_001686763.1] [location=22511..22858]	100	99	0	0
>lcl|NC_010342.1_cds_YP_001686764.1_28 [gene=HAPgp28] [protein=hypothetical protein] [protein_id=YP_001686764.1] [location=complement(23336..23794)]	100	99	0	0
>lcl|NC_010342.1_cds_YP_001686765.1_29 [gene=HAPgp29] [protein=hypothetical protein] [protein_id=YP_001686765.1] [location=complement(23835..24248)]	100	99	0	0
>lcl|NC_010342.1_cds_YP_001686766.1_30 [gene=HAPgp30] [protein=hypothetical protein] [protein_id=YP_001686766.1] [location=complement(24358..24954)]	100	99	50	19
>lcl|NC_010342.1_cds_YP_001686767.1_31 [gene=HAPgp31] [protein=hypothetical protein] [protein_id=YP_001686767.1] [location=complement(25072..25494)]	100	99	0	0
>lcl|NC_010342.1_cds_YP_001686768.1_32 [gene=HAPgp32] [protein=hypothetical protein] [protein_id=YP_001686768.1] [location=complement(25561..25860)]	45.977	87	0	0
>lcl|NC_010342.1_cds_YP_001686769.1_33 [gene=HAPgp33] [protein=ParA-like protein] [protein_id=YP_001686769.1] [location=complement(25853..26617)]	60.287	82	31.183	71
>lcl|NC_010342.1_cds_YP_001686770.1_34 [gene=HAPgp34] [protein=protelomerase] [protein_id=YP_001686770.1] [location=27075..28637]	54.511	99	33.846	85
>lcl|NC_010342.1_cds_YP_001686771.1_35 [gene=HAPgp35] [protein=hypothetical protein] [protein_id=YP_001686771.1] [location=complement(28613..28900)]	100	99	0	0
>lcl|NC_010342.1_cds_YP_001686772.1_36 [gene=HAPgp36] [protein=replication protein RepA] [protein_id=YP_001686772.1] [location=complement(28949..32992)]	50.359	92	28.991	84
>lcl|NC_010342.1_cds_YP_001686773.1_37 [gene=HAPgp37] [protein=prophage repressor] [protein_id=YP_001686773.1] [location=complement(33292..33996)]	31.111	94	28.636	93
>lcl|NC_010342.1_cds_YP_001686774.1_38 [gene=HAPgp38] [protein=prophage antirepressor] [protein_id=YP_001686774.1] [location=34092..34724]	39.073	72	0	0
>lcl|NC_010342.1_cds_YP_001686775.1_39 [gene=HAPgp39] [protein=hypothetical protein] [protein_id=YP_001686775.1] [location=34986..35312]	100	99	0	0
>lcl|NC_010342.1_cds_YP_001686776.1_40 [gene=HAPgp40] [protein=hypothetical protein] [protein_id=YP_001686776.1] [location=35312..35842]	100	99	0	0
>lcl|NC_010342.1_cds_YP_001686777.1_41 [gene=HAPgp41] [protein=hypothetical protein] [protein_id=YP_001686777.1] [location=35839..36066]	98.667	99	0	0
>lcl|NC_010342.1_cds_YP_001686778.1_42 [gene=HAPgp42] [protein=transcription antiterminator] [protein_id=YP_001686778.1] [location=36104..36712]	42.754	68	31.667	58
>lcl|NC_010342.1_cds_YP_001686779.1_43 [gene=HAPgp43] [protein=hypothetical protein] [protein_id=YP_001686779.1] [location=36954..37259]	31.25	90	0	0
>lcl|NC_010342.1_cds_YP_001686780.1_44 [gene=HAPgp44] [protein=hypothetical protein] [protein_id=YP_001686780.1] [location=37468..37665]	100	98	0	0
>lcl|NC_010342.1_cds_YP_001686781.1_45 [gene=HAPgp45] [protein=hypothetical protein] [protein_id=YP_001686781.1] [location=37790..38425]	58.696	87	49.718	83
>lcl|NC_010342.1_cds_YP_001686782.1_46 [gene=HAPgp46] [protein=hypothetical protein] [protein_id=YP_001686782.1] [location=38536..38973]	39.048	72	35.238	72
NC_000929
>lcl|NC_000929.1_cds_NP_050605.1_1 [gene=Mup01] [protein=c-repressor] [protein_id=NP_050605.1] [location=complement(339..863)]	43.75	27	0	0
>lcl|NC_000929.1_cds_NP_050606.1_2 [gene=Mup02] [protein=DNA binding protein ner] [protein_id=NP_050606.1] [location=1099..1326]	45.07	93	58.462	86
>lcl|NC_000929.1_cds_NP_050607.1_3 [gene=Mup03] [protein=transposase] [protein_id=NP_050607.1] [location=1328..3319]	40.476	6	32.964	93
>lcl|NC_000929.1_cds_NP_050608.1_4 [gene=Mup04] [protein=DNA transposition protein] [protein_id=NP_050608.1] [location=3358..4296]	100	8	53.925	93
>lcl|NC_000929.1_cds_NP_050609.1_5 [gene=Mup05] [protein=kil] [protein_id=NP_050609.1] [location=4315..4539]	98.649	99	0	0
>lcl|NC_000929.1_cds_NP_050610.1_6 [gene=Mup06] [protein=hypothetical protein] [protein_id=NP_050610.1] [location=4542..4772]	77.632	99	33.333	77
>lcl|NC_000929.1_cds_NP_050611.1_7 [gene=Mup07] [protein=hypothetical protein] [protein_id=NP_050611.1] [location=4784..5047]	97.403	88	0	0
>lcl|NC_000929.1_cds_NP_050612.1_8 [gene=Mup08] [protein=hypothetical protein] [protein_id=NP_050612.1] [location=5062..5481]	100	44	0	0
>lcl|NC_000929.1_cds_NP_050613.1_9 [gene=Mup09] [protein=hypothetical protein] [protein_id=NP_050613.1] [location=5482..5781]	87.368	95	0	0
>lcl|NC_000929.1_cds_NP_050614.1_10 [gene=Mup10] [protein=Gam] [protein_id=NP_050614.1] [location=5801..6325]	100	49	63.69	96
>lcl|NC_000929.1_cds_NP_050615.1_11 [gene=Mup11] [protein=hypothetical protein] [protein_id=NP_050615.1] [location=6424..6954]	100	18	0	0
>lcl|NC_000929.1_cds_NP_050616.1_12 [gene=Mup12] [protein=hypothetical protein] [protein_id=NP_050616.1] [location=6954..7484]	97.727	25	0	0
>lcl|NC_000929.1_cds_NP_050617.1_13 [gene=Mup13] [protein=hypothetical protein] [protein_id=NP_050617.1] [location=7471..7653]	100	75	0	0
>lcl|NC_000929.1_cds_NP_050618.1_14 [gene=Mup14] [protein=hypothetical protein] [protein_id=NP_050618.1] [location=7655..7957]	94.737	19	0	0
>lcl|NC_000929.1_cds_NP_050619.1_15 [gene=Mup15] [protein=hypothetical protein] [protein_id=NP_050619.1] [location=complement(7896..8162)]	94.737	21	0	0
>lcl|NC_000929.1_cds_NP_050620.1_16 [gene=Mup16] [protein=hypothetical protein] [protein_id=NP_050620.1] [location=8233..8784]	100	14	36.471	92
>lcl|NC_000929.1_cds_NP_050621.1_17 [gene=Mup17] [protein=Mor] [protein_id=NP_050621.1] [location=8781..9170]	100	22	32.759	88
>lcl|NC_000929.1_cds_NP_050622.1_18 [gene=Mup18] [protein=hypothetical protein] [protein_id=NP_050622.1] [location=9248..9466]	97.674	59	35.484	85
>lcl|NC_000929.1_cds_NP_050623.1_19 [gene=Mup19] [protein=hypothetical protein] [protein_id=NP_050623.1] [location=9459..9821]	100	26	0	0
>lcl|NC_000929.1_cds_NP_050624.1_20 [gene=Mup20] [protein=hypothetical protein] [protein_id=NP_050624.1] [location=9831..9950]	100	73	0	0
>lcl|NC_000929.1_cds_NP_050625.1_21 [gene=Mup21] [protein=putative transcription regulator] [protein_id=NP_050625.1] [location=9963..10385]	38.06	95	31.034	80
>lcl|NC_000929.1_cds_NP_050626.1_22 [gene=Mup22] [protein=Lys] [protein_id=NP_050626.1] [location=10480..10995]	97.661	99	46.324	78
>lcl|NC_000929.1_cds_NP_050627.1_23 [gene=Mup23] [protein=hypothetical protein] [protein_id=NP_050627.1] [location=10979..11365]	96.094	99	33.577	98
>lcl|NC_000929.1_cds_NP_050628.1_24 [gene=Mup24] [protein=hypothetical protein] [protein_id=NP_050628.1] [location=11524..11718]	98.438	98	0	0
>lcl|NC_000929.1_cds_NP_050629.1_25 [gene=Mup25] [protein=hypothetical protein] [protein_id=NP_050629.1] [location=11718..12017]	95.918	95	29.577	71
>lcl|NC_000929.1_cds_NP_050630.1_26 [gene=Mup26] [protein=hypothetical protein] [protein_id=NP_050630.1] [location=12014..12304]	100	99	56.989	95
>lcl|NC_000929.1_cds_NP_050631.1_27 [gene=Mup27] [protein=hypothetical protein] [protein_id=NP_050631.1] [location=12316..12891]	100	99	36.598	99
>lcl|NC_000929.1_cds_NP_050632.1_28 [gene=Mup28] [protein=putative portal protein] [protein_id=NP_050632.1] [location=12899..14554]	97.459	99	51.38	85
>lcl|NC_000929.1_cds_NP_050633.1_29 [gene=Mup29] [protein=hypothetical protein] [protein_id=NP_050633.1] [location=14554..16092]	34.463	96	43.619	99
>lcl|NC_000929.1_cds_NP_050634.1_30 [gene=Mup30] [protein=virion morphogenesis late F orf] [protein_id=NP_050634.1] [location=16073..17392]	36.22	55	39.791	85
>lcl|NC_000929.1_cds_NP_050635.1_31 [gene=Mup31] [protein=putative virion morphogenesis protein] [protein_id=NP_050635.1] [location=17389..17859]	39.683	40	37.143	85
>lcl|NC_000929.1_cds_NP_050636.1_32 [gene=Mup32] [protein=putative protease protein] [protein_id=NP_050636.1] [location=18056..19141]	100	16	37.389	92
>lcl|NC_000929.1_cds_NP_050637.1_33 [gene=Mup33] [protein=scaffold protein] [protein_id=NP_050637.1] [location=18590..19141]	32.836	73	32.479	64
>lcl|NC_000929.1_cds_NP_050638.1_34 [gene=Mup34] [protein=major head subunit] [protein_id=NP_050638.1] [location=19138..20055]	48.658	96	51.056	93
>lcl|NC_000929.1_cds_NP_050639.1_35 [gene=Mup35] [protein=hypothetical protein] [protein_id=NP_050639.1] [location=20122..20532]	97.059	99	0	0
>lcl|NC_000929.1_cds_NP_050640.1_36 [gene=Mup36] [protein=hypothetical protein] [protein_id=NP_050640.1] [location=20529..20954]	31.915	96	32.394	99
>lcl|NC_000929.1_cds_NP_050641.1_37 [gene=Mup37] [protein=hypothetical protein] [protein_id=NP_050641.1] [location=20954..21502]	71.978	99	0	0
>lcl|NC_000929.1_cds_NP_050642.1_38 [gene=Mup38] [protein=hypothetical protein] [protein_id=NP_050642.1] [location=21489..21692]	97.015	99	52.632	56
>lcl|NC_000929.1_cds_NP_050643.1_39 [gene=Mup39] [protein=major tail subunit] [protein_id=NP_050643.1] [location=21689..23176]	28.947	99	43.461	99
>lcl|NC_000929.1_cds_NP_050644.1_40 [gene=Mup40] [protein=hypothetical protein] [protein_id=NP_050644.1] [location=23186..23542]	94.068	99	0	0
>lcl|NC_000929.1_cds_NP_050645.1_41 [gene=Mup41] [protein=hypothetical protein] [protein_id=NP_050645.1] [location=23552..23986]	90.278	99	37.037	74
>lcl|NC_000929.1_cds_NP_050646.1_42 [gene=Mup42] [protein=putative tape measure protein] [protein_id=NP_050646.1] [location=24131..26203]	95.362	99	25.478	23
>lcl|NC_000929.1_cds_NP_050647.1_43 [gene=Mup43] [protein=putative DNA circulation protein] [protein_id=NP_050647.1] [location=26208..27695]	99.782	92	37.079	18
>lcl|NC_000929.1_cds_NP_050648.1_44 [gene=Mup44] [protein=putative tail protein] [protein_id=NP_050648.1] [location=27688..28827]	18.563	84	35.754	92
>lcl|NC_000929.1_cds_NP_050649.1_45 [gene=Mup45] [protein=putative baseplate assembly protein] [protein_id=NP_050649.1] [location=28815..29408]	98.477	99	37.566	92
>lcl|NC_000929.1_cds_NP_050650.1_46 [gene=Mup46] [protein=hypothetical protein] [protein_id=NP_050650.1] [location=29405..29842]	32.051	53	45.69	77
>lcl|NC_000929.1_cds_NP_050651.1_47 [gene=Mup47] [protein=hypothetical protein] [protein_id=NP_050651.1] [location=29843..30925]	30.565	82	36.795	93
>lcl|NC_000929.1_cds_NP_050652.1_48 [gene=Mup48] [protein=hypothetical protein] [protein_id=NP_050652.1] [location=30916..31458]	98.889	99	26.702	97
>lcl|NC_000929.1_cds_NP_050653.1_49 [gene=Mup49] [protein=tail fiber] [protein_id=NP_050653.1] [location=31458..32972]	65.325	62	85.924	68
>lcl|NC_000929.1_cds_NP_050654.1_50 [gene=Mup50] [protein=tail fiber assembly] [protein_id=NP_050654.1] [location=32975..33502]	56.497	99	95.429	99
>lcl|NC_000929.1_cds_NP_602302.1_51 [gene=Mup51] [protein=tail fiber assembly protein] [protein_id=NP_602302.1] [location=complement(33531..34064)]	56.497	99	98.87	99
>lcl|NC_000929.1_cds_NP_602303.1_52 [gene=Mup52] [protein=tail fiber fragment] [protein_id=NP_602303.1] [location=complement(34067..35053)]	36	20	94.688	97
>lcl|NC_000929.1_cds_NP_050655.1_53 [gene=Mup53] [protein=Gin] [protein_id=NP_050655.1] [location=35092..35673]	94.444	9	78.453	93
>lcl|NC_000929.1_cds_NP_050656.1_54 [gene=Mup54] [protein=Com] [protein_id=NP_050656.1] [location=35768..35956]	100	41	0	0
>lcl|NC_000929.1_cds_NP_050657.1_55 [gene=Mup55] [protein=Mom] [protein_id=NP_050657.1] [location=35877..36602]	100	10	34.5	80
NC_011810
>lcl|NC_011810.1_cds_YP_002455931.1_1 [gene=PB1_gp01] [protein=hypothetical protein] [protein_id=YP_002455931.1] [location=complement(210..512)]	79	99	81	99
>lcl|NC_011810.1_cds_YP_002455932.1_2 [gene=PB1_gp02] [protein=hypothetical protein] [protein_id=YP_002455932.1] [location=complement(525..671)]	79.167	98	81.25	98
>lcl|NC_011810.1_cds_YP_002455933.1_3 [gene=PB1_gp03] [protein=hypothetical protein] [protein_id=YP_002455933.1] [location=complement(791..979)]	97.727	70	0	0
>lcl|NC_011810.1_cds_YP_002455934.1_4 [gene=PB1_gp04] [protein=terminase large subunit] [protein_id=YP_002455934.1] [location=1179..2561]	67.174	99	97.391	99
>lcl|NC_011810.1_cds_YP_002455935.1_5 [gene=PB1_gp05] [protein=hypothetical protein] [protein_id=YP_002455935.1] [location=complement(2598..2981)]	93.701	99	95.276	99
>lcl|NC_011810.1_cds_YP_002455936.1_6 [gene=PB1_gp06] [protein=hypothetical protein] [protein_id=YP_002455936.1] [location=complement(2978..3196)]	88.889	99	97.222	99
>lcl|NC_011810.1_cds_YP_002455937.1_7 [gene=PB1_gp07] [protein=hypothetical protein] [protein_id=YP_002455937.1] [location=complement(3196..3546)]	62.857	30	51.923	89
>lcl|NC_011810.1_cds_YP_002455938.1_8 [gene=PB1_gp08] [protein=hypothetical protein] [protein_id=YP_002455938.1] [location=complement(3592..4026)]	84.167	83	87.903	86
>lcl|NC_011810.1_cds_YP_002455939.1_9 [gene=PB1_gp09] [protein=hypothetical protein] [protein_id=YP_002455939.1] [location=complement(4029..4808)]	93.436	99	97.683	99
>lcl|NC_011810.1_cds_YP_002455940.1_10 [gene=PB1_gp10] [protein=hypothetical protein] [protein_id=YP_002455940.1] [location=complement(4894..5331)]	81.379	99	84.828	99
>lcl|NC_011810.1_cds_YP_002455941.1_11 [gene=PB1_gp11] [protein=hypothetical protein] [protein_id=YP_002455941.1] [location=complement(5349..5936)]	90.206	99	91.282	99
>lcl|NC_011810.1_cds_YP_002455942.1_12 [gene=PB1_gp12] [protein=hypothetical protein] [protein_id=YP_002455942.1] [location=complement(6038..6970)]	74.839	99	93.226	99
>lcl|NC_011810.1_cds_YP_002455943.1_13 [gene=PB1_gp13] [protein=hypothetical protein] [protein_id=YP_002455943.1] [location=complement(7073..7585)]	87.826	67	96.471	99
>lcl|NC_011810.1_cds_YP_002455944.1_14 [gene=PB1_gp14] [protein=hypothetical protein] [protein_id=YP_002455944.1] [location=complement(7669..7980)]	88.158	73	98.058	99
>lcl|NC_011810.1_cds_YP_002455945.1_15 [gene=PB1_gp15] [protein=hypothetical protein] [protein_id=YP_002455945.1] [location=complement(7986..8189)]	92	74	77.193	84
>lcl|NC_011810.1_cds_YP_002455946.1_16 [gene=PB1_gp16] [protein=hypothetical protein] [protein_id=YP_002455946.1] [location=complement(8186..8509)]	92.523	99	92.523	99
>lcl|NC_011810.1_cds_YP_002455947.1_17 [gene=PB1_gp17] [protein=hypothetical protein] [protein_id=YP_002455947.1] [location=complement(8541..8942)]	78.947	99	80.451	99
>lcl|NC_011810.1_cds_YP_002455948.1_18 [gene=PB1_gp18] [protein=putative minor head protein] [protein_id=YP_002455948.1] [location=9111..11420]	64.648	63	95.509	98
>lcl|NC_011810.1_cds_YP_002455949.1_19 [gene=PB1_gp19] [protein=putative head protein] [protein_id=YP_002455949.1] [location=11420..12256]	93.023	31	95.324	99
>lcl|NC_011810.1_cds_YP_002455950.1_20 [gene=PB1_gp20] [protein=hypothetical protein] [protein_id=YP_002455950.1] [location=12276..12482]	53.731	97	92.647	99
>lcl|NC_011810.1_cds_YP_002455951.1_21 [gene=PB1_gp21] [protein=hypothetical protein] [protein_id=YP_002455951.1] [location=12479..12619]	77.778	96	80	96
>lcl|NC_011810.1_cds_YP_002455952.1_22 [gene=PB1_gp22] [protein=hypothetical protein] [protein_id=YP_002455952.1] [location=13171..14568]	55.508	50	93.548	99
>lcl|NC_011810.1_cds_YP_002455953.1_23 [gene=PB1_gp23] [protein=hypothetical protein] [protein_id=YP_002455953.1] [location=14572..15207]	50.935	99	91.943	99
>lcl|NC_011810.1_cds_YP_002455954.1_24 [gene=PB1_gp24] [protein=hypothetical protein] [protein_id=YP_002455954.1] [location=15217..16365]	60	99	95.026	99
>lcl|NC_011810.1_cds_YP_002455955.1_25 [gene=PB1_gp25] [protein=hypothetical protein] [protein_id=YP_002455955.1] [location=16467..16904]	39.865	96	93.103	99
>lcl|NC_011810.1_cds_YP_002455956.1_26 [gene=PB1_gp26] [protein=hypothetical protein] [protein_id=YP_002455956.1] [location=16919..17386]	51.974	97	97.419	99
>lcl|NC_011810.1_cds_YP_002455957.1_27 [gene=PB1_gp27] [protein=hypothetical protein] [protein_id=YP_002455957.1] [location=17380..17781]	50.413	90	87.121	99
>lcl|NC_011810.1_cds_YP_002455958.1_28 [gene=PB1_gp28] [protein=hypothetical protein] [protein_id=YP_002455958.1] [location=17789..18340]	38.418	96	91.803	99
>lcl|NC_011810.1_cds_YP_002455959.1_29 [gene=PB1_gp29] [protein=hypothetical protein] [protein_id=YP_002455959.1] [location=18337..18918]	97.368	20	99.482	99
>lcl|NC_011810.1_cds_YP_002455960.1_30 [gene=PB1_gp30] [protein=hypothetical protein] [protein_id=YP_002455960.1] [location=18935..20449]	59.725	99	97.024	99
>lcl|NC_011810.1_cds_YP_002455961.1_31 [gene=PB1_gp31] [protein=hypothetical protein] [protein_id=YP_002455961.1] [location=20507..20959]	29.787	93	98	99
>lcl|NC_011810.1_cds_YP_002455962.1_32 [gene=PB1_gp32] [protein=hypothetical protein] [protein_id=YP_002455962.1] [location=20959..21282]	58.252	95	97.196	99
>lcl|NC_011810.1_cds_YP_002455963.1_33 [gene=PB1_gp33] [protein=hypothetical protein] [protein_id=YP_002455963.1] [location=21279..21629]	50	94	96.552	99
>lcl|NC_011810.1_cds_YP_002455964.1_34 [gene=PB1_gp34] [protein=hypothetical protein] [protein_id=YP_002455964.1] [location=21631..22059]	85.149	71	84.158	71
>lcl|NC_011810.1_cds_YP_002455965.1_35 [gene=PB1_gp35] [protein=hypothetical protein] [protein_id=YP_002455965.1] [location=22069..22572]	31.677	92	97.006	99
>lcl|NC_011810.1_cds_YP_002455966.1_36 [gene=PB1_gp36] [protein=hypothetical protein] [protein_id=YP_002455966.1] [location=22572..23111]	39.264	89	97.765	99
>lcl|NC_011810.1_cds_YP_002455967.1_37 [gene=PB1_gp37] [protein=hypothetical protein] [protein_id=YP_002455967.1] [location=23120..23713]	21.622	37	96.954	99
>lcl|NC_011810.1_cds_YP_002455968.1_38 [gene=PB1_gp38] [protein=hypothetical protein] [protein_id=YP_002455968.1] [location=23723..24151]	42.975	85	89.437	99
>lcl|NC_011810.1_cds_YP_002455969.1_39 [gene=PB1_gp39] [protein=putative tail protein containing transglycosylase] [protein_id=YP_002455969.1] [location=24155..26737]	26.194	70	95.93	99
>lcl|NC_011810.1_cds_YP_002455970.1_40 [gene=PB1_gp40] [protein=hypothetical protein] [protein_id=YP_002455970.1] [location=26737..27600]	38.961	99	96.864	99
>lcl|NC_011810.1_cds_YP_002455971.1_41 [gene=PB1_gp41] [protein=hypothetical protein] [protein_id=YP_002455971.1] [location=27600..28133]	43.86	96	92.09	99
>lcl|NC_011810.1_cds_YP_002455972.1_42 [gene=PB1_gp42] [protein=hypothetical protein] [protein_id=YP_002455972.1] [location=28189..28854]	85.714	35	96.38	99
>lcl|NC_011810.1_cds_YP_002455973.1_43 [gene=PB1_gp43] [protein=hypothetical protein] [protein_id=YP_002455973.1] [location=28865..28918]	100	94	0	0
>lcl|NC_011810.1_cds_YP_002455974.1_44 [gene=PB1_gp44] [protein=hypothetical protein] [protein_id=YP_002455974.1] [location=28911..30164]	49.048	99	95.204	99
>lcl|NC_011810.1_cds_YP_002455975.1_45 [gene=PB1_gp45] [protein=hypothetical protein] [protein_id=YP_002455975.1] [location=30161..31675]	56.647	34	96.627	99
>lcl|NC_011810.1_cds_YP_002455976.1_46 [gene=PB1_gp46] [protein=hypothetical protein] [protein_id=YP_002455976.1] [location=31680..34574]	46.718	27	94.606	99
>lcl|NC_011810.1_cds_YP_002455977.1_47 [gene=PB1_gp47] [protein=tail fiber component] [protein_id=YP_002455977.1] [location=34576..35004]	90.845	99	94.366	99
>lcl|NC_011810.1_cds_YP_002455978.1_48 [gene=PB1_gp48] [protein=endolysin] [protein_id=YP_002455978.1] [location=35004..35666]	46.919	95	97.273	99
>lcl|NC_011810.1_cds_YP_002455979.1_49 [gene=PB1_gp49] [protein=hypothetical protein] [protein_id=YP_002455979.1] [location=complement(35690..35941)]	94.203	82	95.652	82
>lcl|NC_011810.1_cds_YP_002455980.1_50 [gene=PB1_gp50] [protein=DNA ligase] [protein_id=YP_002455980.1] [location=complement(36221..37132)]	75.578	99	89.109	99
>lcl|NC_011810.1_cds_YP_002455981.1_51 [gene=PB1_gp51] [protein=hypothetical protein] [protein_id=YP_002455981.1] [location=complement(37186..37740)]	38.421	95	80.435	99
>lcl|NC_011810.1_cds_YP_002455982.1_52 [gene=PB1_gp52] [protein=hypothetical protein] [protein_id=YP_002455982.1] [location=complement(37737..38342)]	42.391	91	100	99
>lcl|NC_011810.1_cds_YP_002455983.1_53 [gene=PB1_gp53] [protein=hypothetical protein] [protein_id=YP_002455983.1] [location=complement(38398..39294)]	56.917	82	97.266	86
>lcl|NC_011810.1_cds_YP_002455984.1_54 [gene=PB1_gp54] [protein=hypothetical protein] [protein_id=YP_002455984.1] [location=complement(39383..40003)]	38.235	81	97.938	94
>lcl|NC_011810.1_cds_YP_002455985.1_55 [gene=PB1_gp55] [protein=helicase] [protein_id=YP_002455985.1] [location=complement(40098..41657)]	46.286	95	95.954	99
>lcl|NC_011810.1_cds_YP_002455986.1_56 [gene=PB1_gp56] [protein=hypothetical protein] [protein_id=YP_002455986.1] [location=complement(41654..42064)]	43.333	65	94.118	99
>lcl|NC_011810.1_cds_YP_002455987.1_57 [gene=PB1_gp57] [protein=DNA polymerase] [protein_id=YP_002455987.1] [location=complement(42057..45164)]	58.196	75	97.005	99
>lcl|NC_011810.1_cds_YP_002455988.1_58 [gene=PB1_gp58] [protein=hypothetical protein] [protein_id=YP_002455988.1] [location=complement(45164..45718)]	48.168	97	97.283	99
>lcl|NC_011810.1_cds_YP_002455989.1_59 [gene=PB1_gp59] [protein=polynucleotide kinase/phosphorylase] [protein_id=YP_002455989.1] [location=complement(45794..46834)]	80.347	99	80.347	99
>lcl|NC_011810.1_cds_YP_002455990.1_60 [gene=PB1_gp60] [protein=hypothetical protein] [protein_id=YP_002455990.1] [location=complement(46837..47028)]	76.19	98	0	0
>lcl|NC_011810.1_cds_YP_002455991.1_61 [gene=PB1_gp61] [protein=thymidylate synthase complementing protein] [protein_id=YP_002455991.1] [location=complement(47030..47947)]	93.443	99	93.77	99
>lcl|NC_011810.1_cds_YP_002455992.1_62 [gene=PB1_gp62] [protein=hypothetical protein] [protein_id=YP_002455992.1] [location=complement(47947..48153)]	75	99	79.412	99
>lcl|NC_011810.1_cds_YP_002455993.1_63 [gene=PB1_gp63] [protein=hypothetical protein] [protein_id=YP_002455993.1] [location=complement(48165..48431)]	80.519	87	85.714	87
>lcl|NC_011810.1_cds_YP_002455994.1_64 [gene=PB1_gp64] [protein=hypothetical protein] [protein_id=YP_002455994.1] [location=complement(48165..48398)]	80.519	99	85.714	99
>lcl|NC_011810.1_cds_YP_002455995.1_65 [gene=PB1_gp65] [protein=hypothetical protein] [protein_id=YP_002455995.1] [location=complement(48431..48649)]	88.889	99	88.889	99
>lcl|NC_011810.1_cds_YP_002455996.1_66 [gene=PB1_gp66] [protein=hypothetical protein] [protein_id=YP_002455996.1] [location=complement(48633..48851)]	95.775	97	97.222	99
>lcl|NC_011810.1_cds_YP_002455997.1_67 [gene=PB1_gp67] [protein=hypothetical protein] [protein_id=YP_002455997.1] [location=complement(48851..49081)]	94.737	99	93.421	99
>lcl|NC_011810.1_cds_YP_002455998.1_68 [gene=PB1_gp68] [protein=hypothetical protein] [protein_id=YP_002455998.1] [location=complement(49171..50172)]	88.889	99	92.492	99
>lcl|NC_011810.1_cds_YP_002455999.1_69 [gene=PB1_gp69] [protein=hypothetical protein] [protein_id=YP_002455999.1] [location=complement(50277..51167)]	44.578	28	98.98	33
>lcl|NC_011810.1_cds_YP_002456000.1_70 [gene=PB1_gp70] [protein=ATP-dependent exonuclease] [protein_id=YP_002456000.1] [location=complement(51328..52515)]	50.663	94	97.468	99
>lcl|NC_011810.1_cds_YP_002456001.1_71 [gene=PB1_gp71] [protein=hypothetical protein] [protein_id=YP_002456001.1] [location=complement(52502..52924)]	94.286	99	95	99
>lcl|NC_011810.1_cds_YP_002456002.1_72 [gene=PB1_gp72] [protein=hypothetical protein] [protein_id=YP_002456002.1] [location=53092..53877]	75	9	89.655	99
>lcl|NC_011810.1_cds_YP_002456003.1_73 [gene=PB1_gp73] [protein=hypothetical protein] [protein_id=YP_002456003.1] [location=53888..54940]	35.039	66	54.587	51
>lcl|NC_011810.1_cds_YP_002456004.1_74 [gene=PB1_gp74] [protein=hypothetical protein] [protein_id=YP_002456004.1] [location=54940..55389]	81.579	99	77.632	99
>lcl|NC_011810.1_cds_YP_002456005.1_75 [gene=PB1_gp75] [protein=hypothetical protein] [protein_id=YP_002456005.1] [location=55386..56462]	66.387	98	98.603	99
>lcl|NC_011810.1_cds_YP_002456006.1_76 [gene=PB1_gp76] [protein=hypothetical protein] [protein_id=YP_002456006.1] [location=56468..56653]	83.607	98	100	98
>lcl|NC_011810.1_cds_YP_002456007.1_77 [gene=PB1_gp77] [protein=helicase] [protein_id=YP_002456007.1] [location=56801..58540]	43.018	77	97.496	96
>lcl|NC_011810.1_cds_YP_002456008.1_78 [gene=PB1_gp79] [protein=hypothetical protein] [protein_id=YP_002456008.1] [location=59511..60089]	95.722	97	96.257	97
>lcl|NC_011810.1_cds_YP_002456009.1_79 [gene=PB1_gp80] [protein=hypothetical protein] [protein_id=YP_002456009.1] [location=complement(60252..60866)]	86.765	99	97.059	99
>lcl|NC_011810.1_cds_YP_002456010.1_80 [gene=PB1_gp81] [protein=hypothetical protein] [protein_id=YP_002456010.1] [location=complement(61059..61664)]	83.333	21	85.714	59
>lcl|NC_011810.1_cds_YP_002456011.1_81 [gene=PB1_gp82] [protein=hypothetical protein] [protein_id=YP_002456011.1] [location=complement(61674..61991)]	86.667	99	87.619	99
>lcl|NC_011810.1_cds_YP_002456012.1_82 [gene=PB1_gp83] [protein=hypothetical protein] [protein_id=YP_002456012.1] [location=complement(62042..62263)]	33.803	93	95.89	99
>lcl|NC_011810.1_cds_YP_002456013.1_83 [gene=PB1_gp84] [protein=hypothetical protein] [protein_id=YP_002456013.1] [location=complement(62319..62543)]	89.189	99	97.297	99
>lcl|NC_011810.1_cds_YP_002456014.1_84 [gene=PB1_gp85] [protein=hypothetical protein] [protein_id=YP_002456014.1] [location=complement(62603..62929)]	92.308	48	92.381	96
>lcl|NC_011810.1_cds_YP_002456015.1_85 [gene=PB1_gp86] [protein=hypothetical protein] [protein_id=YP_002456015.1] [location=complement(62932..63579)]	88.889	90	97.209	99
>lcl|NC_011810.1_cds_YP_002456016.1_86 [gene=PB1_gp87] [protein=hypothetical protein] [protein_id=YP_002456016.1] [location=complement(63611..63823)]	70	99	92.857	99
>lcl|NC_011810.1_cds_YP_002456017.1_87 [gene=PB1_gp88] [protein=hypothetical protein] [protein_id=YP_002456017.1] [location=complement(63820..64020)]	50	90	96.97	99
>lcl|NC_011810.1_cds_YP_002456018.1_88 [gene=PB1_gp89] [protein=hypothetical protein] [protein_id=YP_002456018.1] [location=complement(64017..64232)]	90.141	99	100	99
>lcl|NC_011810.1_cds_YP_002456019.1_89 [gene=PB1_gp90] [protein=hypothetical protein] [protein_id=YP_002456019.1] [location=complement(64229..64429)]	71.212	99	72.727	99
>lcl|NC_011810.1_cds_YP_002456020.1_90 [gene=PB1_gp91] [protein=hypothetical protein] [protein_id=YP_002456020.1] [location=complement(64487..64690)]	93.182	65	95.455	65
>lcl|NC_011810.1_cds_YP_002456021.1_91 [gene=PB1_gp92] [protein=hypothetical protein] [protein_id=YP_002456021.1] [location=complement(64554..64739)]	93.333	73	95.082	98
>lcl|NC_011810.1_cds_YP_002456022.1_92 [gene=PB1_gp93] [protein=hypothetical protein] [protein_id=YP_002456022.1] [location=complement(64819..65007)]	80.645	98	83.871	98
>lcl|NC_011810.1_cds_YP_002456023.1_93 [gene=PB1_gp94] [protein=hypothetical protein] [protein_id=YP_002456023.1] [location=complement(65010..65669)]	64.078	47	66.019	47
NC_001895
>lcl|NC_001895.1_cds_NP_046757.1_1 [gene=Q] [protein=portal vertex protein] [protein_id=NP_046757.1] [location=complement(187..1221)]	42.484	44	34.049	92
>lcl|NC_001895.1_cds_NP_046758.1_2 [gene=P] [protein=terminase ATPase subunit] [protein_id=NP_046758.1] [location=complement(1221..2993)]	36.585	41	41.818	97
>lcl|NC_001895.1_cds_NP_046759.1_3 [gene=O] [protein=capsid-scaffolding protein] [protein_id=NP_046759.1] [location=3167..4021]	42.657	50	44.286	49
>lcl|NC_001895.1_cds_NP_046760.1_4 [gene=N] [protein=capsid protein] [protein_id=NP_046760.1] [location=4080..5153]	26.25	87	27.3	93
>lcl|NC_001895.1_cds_NP_046761.1_5 [gene=M] [protein=terminase endonuclease subunit] [protein_id=NP_046761.1] [location=5157..5900]	28.099	48	28.488	69
>lcl|NC_001895.1_cds_NP_046762.1_6 [gene=L] [protein=gpL] [protein_id=NP_046762.1] [location=6000..6509]	29.73	84	0	0
>lcl|NC_001895.1_cds_NP_046763.1_7 [gene=X] [protein=gpX] [protein_id=NP_046763.1] [location=6509..6712]	43.662	99	43.75	94
>lcl|NC_001895.1_cds_NP_046764.1_8 [gene=Y] [protein=gpY] [protein_id=NP_046764.1] [location=6716..6997]	100	85	47.727	94
>lcl|NC_001895.1_cds_NP_046765.1_9 [gene=K] [protein=gpK] [protein_id=NP_046765.1] [location=6997..7494]	49.697	99	57.862	95
>lcl|NC_001895.1_cds_NP_046766.1_10 [gene=lysA] [protein=LysA] [protein_id=NP_046766.1] [location=7509..7934]	92.199	99	0	0
>lcl|NC_001895.1_cds_NP_046767.1_11 [gene=lysB] [protein=LysB] [protein_id=NP_046767.1] [location=7922..8347]	47.5	28	0	0
>lcl|NC_001895.1_cds_NP_757382.1_12 [gene=lysC] [protein=LysC] [protein_id=NP_757382.1] [location=8202..8492]	46.341	42	0	0
>lcl|NC_001895.1_cds_NP_046768.1_13 [gene=R] [protein=gpR] [protein_id=NP_046768.1] [location=8455..8922]	36.765	44	0	0
>lcl|NC_001895.1_cds_NP_046769.1_14 [gene=S] [protein=gpS] [protein_id=NP_046769.1] [location=8915..9367]	25.49	97	28.916	96
>lcl|NC_001895.1_cds_NP_046770.1_15 [gene=P2p15] [protein=hypothetical protein] [protein_id=NP_046770.1] [location=complement(9439..10224)]	100	99	0	0
>lcl|NC_001895.1_cds_NP_046771.1_16 [gene=V] [protein=gpV] [protein_id=NP_046771.1] [location=10308..10943]	43.86	53	35.135	69
>lcl|NC_001895.1_cds_NP_046772.1_17 [gene=W] [protein=baseplate wedge subunit] [protein_id=NP_046772.1] [location=10940..11287]	50.667	64	42.308	90
>lcl|NC_001895.1_cds_NP_046773.1_18 [gene=J] [protein=baseplate assembly protein] [protein_id=NP_046773.1] [location=11292..12200]	50.909	73	38.014	96
>lcl|NC_001895.1_cds_NP_046774.1_19 [gene=I] [protein=gpI] [protein_id=NP_046774.1] [location=12193..12723]	39.655	64	33.149	92
>lcl|NC_001895.1_cds_NP_046775.1_20 [gene=H] [protein=gpH] [protein_id=NP_046775.1] [location=12734..14743]	50.82	8	90.385	16
>lcl|NC_001895.1_cds_NP_046776.1_21 [gene=G] [protein=gpG] [protein_id=NP_046776.1] [location=14747..15274]	39.286	29	95.429	99
>lcl|NC_001895.1_cds_NP_046777.1_22 [gene=fun(Z)] [protein=Fun(Z)] [protein_id=NP_046777.1] [location=complement(15675..17261)]	100	99	0	0
>lcl|NC_001895.1_cds_NP_046778.1_23 [gene=FI] [protein=major tail sheath protein] [protein_id=NP_046778.1] [location=17652..18842]	44.332	99	35.733	95
>lcl|NC_001895.1_cds_NP_046779.1_24 [gene=FII] [protein=major tail tube protein] [protein_id=NP_046779.1] [location=18855..19373]	73.529	39	37.059	98
>lcl|NC_001895.1_cds_NP_046780.1_25 [gene=E+E'] [protein=gpE+E'] [protein_id=NP_046780.1] [location=join(19430..19684	19684..19857)]	54.286	24	0	0
>lcl|NC_001895.1_cds_NP_046781.1_26 [gene=E] [protein=gpE] [protein_id=NP_046781.1] [location=19430..19705]	35	87	0	0
>lcl|NC_001895.1_cds_NP_046782.1_27 [gene=T] [protein=gpT] [protein_id=NP_046782.1] [location=19850..22297]	42.708	10	24.178	62
>lcl|NC_001895.1_cds_NP_046783.1_28 [gene=U] [protein=gpU] [protein_id=NP_046783.1] [location=22312..22791]	50	23	30.233	80
>lcl|NC_001895.1_cds_NP_046784.1_29 [gene=D] [protein=tail protein] [protein_id=NP_046784.1] [location=22791..23954]	34.444	93	35.683	57
>lcl|NC_001895.1_cds_NP_046785.1_30 [gene=ogr] [protein=Ogr] [protein_id=NP_046785.1] [location=24036..24254]	40	55	0	0
>lcl|NC_001895.1_cds_NP_046786.1_31 [gene=int] [protein=integrase] [protein_id=NP_046786.1] [location=complement(24462..25475)]	37.349	24	38.806	95
>lcl|NC_001895.1_cds_NP_046787.1_32 [gene=C] [protein=gpC] [protein_id=NP_046787.1] [location=complement(25591..25890)]	43.158	95	0	0
>lcl|NC_001895.1_cds_NP_046788.1_33 [gene=cox] [protein=Cox] [protein_id=NP_046788.1] [location=26005..26280]	40	60	0	0
>lcl|NC_001895.1_cds_NP_046789.1_34 [gene=P2p34] [protein=hypothetical protein] [protein_id=NP_046789.1] [location=26291..26461]	96.429	98	0	0
>lcl|NC_001895.1_cds_NP_046790.1_35 [gene=B] [protein=gpB] [protein_id=NP_046790.1] [location=26458..26958]	98.193	99	0	0
>lcl|NC_001895.1_cds_NP_046791.1_36 [gene=P2p36] [protein=hypothetical protein] [protein_id=NP_046791.1] [location=27022..27246]	39.216	68	0	0
>lcl|NC_001895.1_cds_NP_046792.1_37 [gene=P2p37] [protein=hypothetical protein] [protein_id=NP_046792.1] [location=27246..27548]	87.879	98	0	0
>lcl|NC_001895.1_cds_NP_046793.1_38 [gene=P2p38] [protein=DksA-like zinc finger domain containing protein] [protein_id=NP_046793.1] [location=27548..27772]	45.714	93	0	0
>lcl|NC_001895.1_cds_NP_046794.1_39 [gene=P2p39] [protein=hypothetical protein] [protein_id=NP_046794.1] [location=27769..28044]	50	93	38.462	97
>lcl|NC_001895.1_cds_NP_046795.1_40 [gene=A] [protein=gpA] [protein_id=NP_046795.1] [location=28034..30319]	48.413	17	95.652	39
>lcl|NC_001895.1_cds_NP_046796.1_41 [gene=P2p41] [protein=hypothetical protein] [protein_id=NP_046796.1] [location=30316..30645]	94.667	68	45.333	68
>lcl|NC_001895.1_cds_NP_046797.1_42 [gene=tin] [protein=Tin] [protein_id=NP_046797.1] [location=complement(30684..31445)]	100	99	0	0
>lcl|NC_001895.1_cds_NP_046798.1_43 [gene=old] [protein=Old] [protein_id=NP_046798.1] [location=complement(31620..33380)]	25.607	77	0	0
NC_007917
>lcl|NC_007917.1_cds_YP_529552.1_1 [gene=ter1] [protein=putative terminase small subunit] [protein_id=YP_529552.1] [location=201..692]	100	99	80.412	59
>lcl|NC_007917.1_cds_YP_529553.1_2 [gene=ter2] [protein=putative terminase large subunit] [protein_id=YP_529553.1] [location=778..1746]	100	99	77.432	79
>lcl|NC_007917.1_cds_YP_529554.1_3 [gene=CDBPCV119_gp03] [protein=hypothetical protein] [protein_id=YP_529554.1] [location=1897..2595]	100	99	39.394	28
>lcl|NC_007917.1_cds_YP_529555.1_4 [gene=CDBPCV119_gp04] [protein=putative portal protein] [protein_id=YP_529555.1] [location=2610..3965]	37.9	47	45.024	89
>lcl|NC_007917.1_cds_YP_529556.1_5 [gene=CDBPCV119_gp05] [protein=putative head protein] [protein_id=YP_529556.1] [location=3978..5018]	31.646	23	37.278	97
>lcl|NC_007917.1_cds_YP_529557.1_6 [gene=CDBPCV119_gp06] [protein=hypothetical protein] [protein_id=YP_529557.1] [location=5086..5715]	100	93	59.574	22
>lcl|NC_007917.1_cds_YP_529558.1_7 [gene=CDBPCV119_gp07] [protein=hypothetical protein] [protein_id=YP_529558.1] [location=5737..5931]	100	58	0	0
>lcl|NC_007917.1_cds_YP_529559.1_8 [gene=CDBPCV119_gp08] [protein=putative scaffold protein] [protein_id=YP_529559.1] [location=6323..6919]	43.333	45	36.81	80
>lcl|NC_007917.1_cds_YP_529560.1_9 [gene=CDBPCV119_gp09] [protein=putative capsid protein] [protein_id=YP_529560.1] [location=6943..7881]	24.39	74	28.477	95
>lcl|NC_007917.1_cds_YP_529561.1_10 [gene=CDBPCV119_gp10] [protein=hypothetical protein] [protein_id=YP_529561.1] [location=8142..8423]	100	99	0	0
>lcl|NC_007917.1_cds_YP_529562.1_11 [gene=CDBPCV119_gp11] [protein=hypothetical protein] [protein_id=YP_529562.1] [location=8496..8846]	100	99	32.432	61
>lcl|NC_007917.1_cds_YP_529563.1_12 [gene=CDBPCV119_gp12] [protein=hypothetical protein] [protein_id=YP_529563.1] [location=8909..9259]	28.947	89	0	0
>lcl|NC_007917.1_cds_YP_529564.1_13 [gene=CDBPCV119_gp13] [protein=hypothetical protein] [protein_id=YP_529564.1] [location=9270..9722]	100	99	0	0
>lcl|NC_007917.1_cds_YP_529565.1_14 [gene=xkdK] [protein=XkdK protein] [protein_id=YP_529565.1] [location=9723..10793]	24.155	57	39.665	99
>lcl|NC_007917.1_cds_YP_529566.1_15 [gene=xkdM] [protein=XkdM protein] [protein_id=YP_529566.1] [location=10808..11239]	34.286	49	42.254	99
>lcl|NC_007917.1_cds_YP_529567.1_16 [gene=xkdN] [protein=XkdN protein] [protein_id=YP_529567.1] [location=11271..11741]	28.07	67	41.727	87
>lcl|NC_007917.1_cds_YP_529568.1_17 [gene=CDBPCV119_gp17] [protein=putative tape measure protein] [protein_id=YP_529568.1] [location=11918..14752]	100	99	36.077	37
>lcl|NC_007917.1_cds_YP_529569.1_18 [gene=CDBPCV119_gp18] [protein=hypothetical protein] [protein_id=YP_529569.1] [location=14957..15577]	100	99	0	0
>lcl|NC_007917.1_cds_YP_529570.1_19 [gene=CDBPCV119_gp19] [protein=hypothetical protein] [protein_id=YP_529570.1] [location=16506..16751]	41.935	76	0	0
>lcl|NC_007917.1_cds_YP_529571.1_20 [gene=xkdP] [protein=XkdP protein] [protein_id=YP_529571.1] [location=16769..17155]	32.632	67	37.008	93
>lcl|NC_007917.1_cds_YP_529572.1_21 [protein=hypothetical protein] [protein_id=YP_529572.1] [location=17134..17442]	39.189	68	0	0
>lcl|NC_007917.1_cds_YP_529573.1_22 [gene=CDBPCV119_gp22] [protein=hypothetical protein] [protein_id=YP_529573.1] [location=17463..17705]	48.837	53	0	0
>lcl|NC_007917.1_cds_YP_529574.1_23 [gene=xkdQ] [protein=XkdQ protein] [protein_id=YP_529574.1] [location=17964..18650]	93.805	99	29.114	98
>lcl|NC_007917.1_cds_YP_529575.1_24 [gene=CDBPCV119_gp24] [protein=hypothetical protein] [protein_id=YP_529575.1] [location=18694..19317]	45.588	83	0	0
>lcl|NC_007917.1_cds_YP_529576.1_25 [protein=hypothetical protein] [protein_id=YP_529576.1] [location=19500..19826]	87.037	99	0	0
>lcl|NC_007917.1_cds_YP_529577.1_26 [gene=xkdS] [protein=XkdS protein] [protein_id=YP_529577.1] [location=19826..20194]	32.479	93	44.34	81
>lcl|NC_007917.1_cds_YP_529578.1_27 [gene=xkdT] [protein=XkdT protein] [protein_id=YP_529578.1] [location=20248..21300]	26.211	95	36.441	98
>lcl|NC_007917.1_cds_YP_529579.1_28 [protein=hypothetical protein] [protein_id=YP_529579.1] [location=21300..21908]	25.185	67	37.692	64
>lcl|NC_007917.1_cds_YP_529580.1_29 [gene=CDBPCV119_gp29] [protein=hypothetical protein] [protein_id=YP_529580.1] [location=21925..22323]	55.856	83	50	93
>lcl|NC_007917.1_cds_YP_529581.1_30 [gene=CDBPCV119_gp30] [protein=hypothetical protein] [protein_id=YP_529581.1] [location=22382..22705]	59.459	28	0	0
>lcl|NC_007917.1_cds_YP_529582.1_31 [gene=CDBPCV119_gp31] [protein=hypothetical protein] [protein_id=YP_529582.1] [location=22723..23994]	54.545	8	0	0
>lcl|NC_007917.1_cds_YP_529583.1_32 [gene=CDBPCV119_gp32] [protein=hypothetical protein] [protein_id=YP_529583.1] [location=23994..24176]	91.525	97	0	0
>lcl|NC_007917.1_cds_YP_529584.1_33 [gene=CDBPCV119_gp33] [protein=hypothetical protein] [protein_id=YP_529584.1] [location=24212..24442]	85.526	99	36.842	99
>lcl|NC_007917.1_cds_YP_529585.1_34 [gene=CDBPCV119_gp34] [protein=putative holin] [protein_id=YP_529585.1] [location=24462..24719]	88.235	99	47.059	97
>lcl|NC_007917.1_cds_YP_529586.1_35 [gene=CDBPCV119_gp35] [protein=putative lysin] [protein_id=YP_529586.1] [location=24719..25534]	35.379	99	39.286	60
>lcl|NC_007917.1_cds_YP_529587.1_36 [gene=CDBPCV119_gp36] [protein=hypothetical protein] [protein_id=YP_529587.1] [location=25551..25847]	100	99	0	0
>lcl|NC_007917.1_cds_YP_529588.1_37 [gene=CDBPCV119_gp37] [protein=hypothetical protein] [protein_id=YP_529588.1] [location=26360..26953]	100	94	0	0
>lcl|NC_007917.1_cds_YP_529589.1_38 [gene=CDBPCV119_gp38] [protein=hypothetical protein] [protein_id=YP_529589.1] [location=26971..27402]	100	99	0	0
>lcl|NC_007917.1_cds_YP_529590.1_39 [gene=CDBPCV119_gp39] [protein=hypothetical protein] [protein_id=YP_529590.1] [location=27404..27730]	100	99	0	0
>lcl|NC_007917.1_cds_YP_529591.1_40 [gene=CDBPCV119_gp40] [protein=hypothetical protein] [protein_id=YP_529591.1] [location=27702..28109]	100	99	0	0
>lcl|NC_007917.1_cds_YP_529592.1_41 [gene=CDBPCV119_gp41] [protein=hypothetical protein] [protein_id=YP_529592.1] [location=29562..29843]	39.13	49	0	0
>lcl|NC_007917.1_cds_YP_529593.1_42 [gene=CDBPCV119_gp42] [protein=hypothetical protein] [protein_id=YP_529593.1] [location=29883..30155]	38.462	71	0	0
>lcl|NC_007917.1_cds_YP_529594.1_43 [gene=int] [protein=putative integrase] [protein_id=YP_529594.1] [location=complement(30567..31673)]	27.792	97	23.099	89
>lcl|NC_007917.1_cds_YP_529595.1_44 [gene=CDBPCV119_gp44] [protein=hypothetical protein] [protein_id=YP_529595.1] [location=complement(31732..32133)]	100	99	57.143	99
>lcl|NC_007917.1_cds_YP_529596.1_45 [gene=repR] [protein=RepR; putative repressor] [protein_id=YP_529596.1] [location=complement(32781..33176)]	35	86	53.03	50
>lcl|NC_007917.1_cds_YP_529597.1_46 [gene=CDBPCV119_gp46] [protein=hypothetical protein] [protein_id=YP_529597.1] [location=complement(33693..33911)]	27.536	93	39.394	90
>lcl|NC_007917.1_cds_YP_529598.1_47 [gene=CDBPCV119_gp47] [protein=putative antirepressor] [protein_id=YP_529598.1] [location=34260..35093]	74.06	94	65.714	38
>lcl|NC_007917.1_cds_YP_529599.1_48 [gene=CDBPCV119_gp48] [protein=hypothetical protein] [protein_id=YP_529599.1] [location=35137..35331]	96.875	98	0	0
>lcl|NC_007917.1_cds_YP_529600.1_49 [gene=CDBPCV119_gp49] [protein=hypothetical protein] [protein_id=YP_529600.1] [location=35954..36310]	100	99	0	0
>lcl|NC_007917.1_cds_YP_529601.1_50 [gene=CDBPCV119_gp50] [protein=hypothetical protein] [protein_id=YP_529601.1] [location=37273..37515]	96.25	99	35.714	86
>lcl|NC_007917.1_cds_YP_529602.1_51 [gene=CDBPCV119_gp51] [protein=hypothetical protein] [protein_id=YP_529602.1] [location=37525..38133]	91.584	99	58.088	67
>lcl|NC_007917.1_cds_YP_529603.1_52 [gene=CDBPCV119_gp52] [protein=putative replication protein] [protein_id=YP_529603.1] [location=38134..39024]	52.288	95	39.604	34
>lcl|NC_007917.1_cds_YP_529604.1_53 [gene=CDBPCV119_gp53] [protein=hypothetical protein] [protein_id=YP_529604.1] [location=39274..39681]	43.478	99	33.333	99
>lcl|NC_007917.1_cds_YP_529605.1_54 [gene=CDBPCV119_gp54] [protein=hypothetical protein] [protein_id=YP_529605.1] [location=39756..40010]	100	99	0	0
>lcl|NC_007917.1_cds_YP_529606.1_55 [gene=CDBPCV119_gp55] [protein=hypothetical protein] [protein_id=YP_529606.1] [location=40057..40347]	32.99	96	0	0
>lcl|NC_007917.1_cds_YP_529607.1_56 [gene=CDBPCV119_gp56] [protein=hypothetical protein] [protein_id=YP_529607.1] [location=40344..40709]	100	99	0	0
>lcl|NC_007917.1_cds_YP_529608.1_57 [gene=CDBPCV119_gp57] [protein=hypothetical protein] [protein_id=YP_529608.1] [location=40774..41094]	38	47	0	0
>lcl|NC_007917.1_cds_YP_529609.1_58 [gene=CDBPCV119_gp58] [protein=hypothetical protein] [protein_id=YP_529609.1] [location=41354..41527]	100	98	0	0
>lcl|NC_007917.1_cds_YP_529610.1_59 [gene=CDBPCV119_gp59] [protein=hypothetical protein] [protein_id=YP_529610.1] [location=41527..41862]	99.048	94	0	0
>lcl|NC_007917.1_cds_YP_529611.1_60 [gene=CDBPCV119_gp60] [protein=hypothetical protein] [protein_id=YP_529611.1] [location=41947..42729]	99.569	89	53.165	90
>lcl|NC_007917.1_cds_YP_529612.1_61 [gene=CDBPCV119_gp61] [protein=hypothetical protein] [protein_id=YP_529612.1] [location=42710..43042]	81.481	24	45.775	83
>lcl|NC_007917.1_cds_YP_529613.1_62 [gene=CDBPCV119_gp62] [protein=hypothetical protein] [protein_id=YP_529613.1] [location=43341..43997]	86.567	31	0	0
>lcl|NC_007917.1_cds_YP_529614.1_63 [gene=CDBPCV119_gp63] [protein=hypothetical protein] [protein_id=YP_529614.1] [location=43969..44337]	66.667	52	0	0
>lcl|NC_007917.1_cds_YP_529615.1_64 [gene=CDBPCV119_gp64] [protein=hypothetical protein] [protein_id=YP_529615.1] [location=44368..45072]	100	99	26.804	73
>lcl|NC_007917.1_cds_YP_529616.1_65 [gene=CDBPCV119_gp65] [protein=hypothetical protein] [protein_id=YP_529616.1] [location=45069..45242]	100	98	0	0
>lcl|NC_007917.1_cds_YP_529617.1_66 [gene=CDBPCV119_gp66] [protein=hypothetical protein] [protein_id=YP_529617.1] [location=45235..45606]	76.923	94	0	0
>lcl|NC_007917.1_cds_YP_529618.1_67 [gene=CDBPCV119_gp67] [protein=hypothetical protein] [protein_id=YP_529618.1] [location=45609..46076]	45.349	54	0	0
>lcl|NC_007917.1_cds_YP_529619.1_68 [gene=CDBPCV119_gp68] [protein=hypothetical protein] [protein_id=YP_529619.1] [location=46155..46340]	100	98	0	0
>lcl|NC_007917.1_cds_YP_529620.1_69 [gene=CDBPCV119_gp69] [protein=hypothetical protein] [protein_id=YP_529620.1] [location=46354..46593]	100	99	0	0
>lcl|NC_007917.1_cds_YP_529621.1_70 [gene=mcdi633] [protein=methyltransferase] [protein_id=YP_529621.1] [location=46722..47528]	100	99	30.798	94
>lcl|NC_007917.1_cds_YP_529622.1_71 [gene=CDBPCV119_gp71] [protein=putative Holliday junction resolvase] [protein_id=YP_529622.1] [location=47542..47895]	86.325	99	46.154	86
>lcl|NC_007917.1_cds_YP_529623.1_72 [gene=CDBPCV119_gp72] [protein=hypothetical protein] [protein_id=YP_529623.1] [location=47984..48691]	45.882	36	49.55	46
>lcl|NC_007917.1_cds_YP_529624.1_73 [gene=CDBPCV119_gp73] [protein=hypothetical protein] [protein_id=YP_529624.1] [location=48785..49273]	52.564	96	40	85
>lcl|NC_007917.1_cds_YP_529625.1_74 [gene=CDBPCV119_gp74] [protein=hypothetical protein] [protein_id=YP_529625.1] [location=50000..50194]	100	98	0	0
>lcl|NC_007917.1_cds_YP_529626.1_75 [gene=CDBPCV119_gp75] [protein=hypothetical protein] [protein_id=YP_529626.1] [location=50194..50805]	100	94	36.364	54
>lcl|NC_007917.1_cds_YP_529627.1_76 [gene=CDBPCV119_gp76] [protein=hypothetical protein] [protein_id=YP_529627.1] [location=50824..51069]	100	99	0	0
>lcl|NC_007917.1_cds_YP_529628.1_77 [gene=CDBPCV119_gp77] [protein=hypothetical protein] [protein_id=YP_529628.1] [location=51466..52410]	100	99	0	0
>lcl|NC_007917.1_cds_YP_529629.1_78 [gene=CDBPCV119_gp78] [protein=hypothetical protein] [protein_id=YP_529629.1] [location=52718..53017]	100	99	0	0
>lcl|NC_007917.1_cds_YP_529630.1_79 [gene=CDBPCV119_gp79] [protein=hypothetical protein] [protein_id=YP_529630.1] [location=53083..53313]	100	99	60.811	96
NC_004629
>lcl|NC_004629.1_cds_NP_803567.1_1 [gene=PHIKZ001] [protein=ORF001] [protein_id=NP_803567.1] [location=164..553]	38.614	75	100	99
>lcl|NC_004629.1_cds_NP_803568.1_2 [gene=PHIKZ002] [protein=ORF002] [protein_id=NP_803568.1] [location=517..1101]	24.528	79	100	99
>lcl|NC_004629.1_cds_NP_803569.1_3 [gene=PHIKZ003] [protein=ORF003] [protein_id=NP_803569.1] [location=1076..1582]	100	99	99.405	99
>lcl|NC_004629.1_cds_NP_803570.1_4 [gene=PHIKZ004] [protein=ORF004] [protein_id=NP_803570.1] [location=1582..2103]	34.307	77	100	99
>lcl|NC_004629.1_cds_NP_803571.1_5 [gene=PHIKZ005] [protein=ORF005] [protein_id=NP_803571.1] [location=2220..2624]	30.392	76	97.761	99
>lcl|NC_004629.1_cds_NP_803572.1_6 [gene=PHIKZ006] [protein=ORF006] [protein_id=NP_803572.1] [location=2719..3234]	39.683	37	100	99
>lcl|NC_004629.1_cds_NP_803573.1_7 [gene=PHIKZ007] [protein=ORF007] [protein_id=NP_803573.1] [location=3252..3488]	40.909	84	98.438	81
>lcl|NC_004629.1_cds_NP_803574.1_8 [gene=PHIKZ008] [protein=ORF008] [protein_id=NP_803574.1] [location=3491..3703]	100	99	100	99
>lcl|NC_004629.1_cds_NP_803575.1_9 [gene=PHIKZ009] [protein=ORF009] [protein_id=NP_803575.1] [location=3805..4137]	100	57	100	99
>lcl|NC_004629.1_cds_NP_803576.1_10 [gene=PHIKZ010] [protein=ORF010] [protein_id=NP_803576.1] [location=4219..4479]	30.488	87	100	99
>lcl|NC_004629.1_cds_NP_803577.1_11 [gene=PHIKZ011] [protein=ORF011] [protein_id=NP_803577.1] [location=4730..5071]	44.615	57	94.366	62
>lcl|NC_004629.1_cds_NP_803578.1_12 [gene=PHIKZ012] [protein=ORF012] [protein_id=NP_803578.1] [location=5077..5475]	30.556	54	90.323	93
>lcl|NC_004629.1_cds_NP_803579.1_13 [gene=PHIKZ013] [protein=ORF013] [protein_id=NP_803579.1] [location=5649..6056]	29.825	83	72.593	99
>lcl|NC_004629.1_cds_NP_803580.1_14 [gene=PHIKZ014] [protein=ORF014] [protein_id=NP_803580.1] [location=6206..7318]	30.566	70	100	99
>lcl|NC_004629.1_cds_NP_803581.1_15 [gene=PHIKZ015] [protein=ORF015] [protein_id=NP_803581.1] [location=7424..8425]	100	99	96.697	99
>lcl|NC_004629.1_cds_NP_803582.1_16 [gene=PHIKZ016] [protein=ORF016] [protein_id=NP_803582.1] [location=8438..8917]	29.375	96	93.878	61
>lcl|NC_004629.1_cds_NP_803583.1_17 [gene=PHIKZ017] [protein=ORF017] [protein_id=NP_803583.1] [location=9147..9539]	26.316	85	100	99
>lcl|NC_004629.1_cds_NP_803584.1_18 [gene=PHIKZ018] [protein=ORF018] [protein_id=NP_803584.1] [location=9602..9931]	100	99	100	99
>lcl|NC_004629.1_cds_NP_803585.1_19 [gene=PHIKZ019] [protein=ORF019] [protein_id=NP_803585.1] [location=9960..10169]	100	99	98.551	99
>lcl|NC_004629.1_cds_NP_803586.1_20 [gene=PHIKZ020] [protein=ORF020] [protein_id=NP_803586.1] [location=10255..10512]	75.385	76	0	0
>lcl|NC_004629.1_cds_NP_803587.1_21 [gene=PHIKZ021] [protein=ORF021] [protein_id=NP_803587.1] [location=10659..10994]	48.624	97	0	0
>lcl|NC_004629.1_cds_NP_803588.1_22 [gene=PHIKZ022] [protein=ORF022] [protein_id=NP_803588.1] [location=11002..11565]	56.667	32	100	61
>lcl|NC_004629.1_cds_NP_803589.1_23 [gene=PHIKZ023] [protein=ORF023] [protein_id=NP_803589.1] [location=11569..11985]	33.333	55	0	0
>lcl|NC_004629.1_cds_NP_803590.1_24 [gene=PHIKZ024] [protein=ORF024] [protein_id=NP_803590.1] [location=12264..12530]	100	27	98.864	99
>lcl|NC_004629.1_cds_NP_803591.1_25 [gene=PHIKZ025] [protein=ORF025] [protein_id=NP_803591.1] [location=complement(12584..14737)]	27.288	81	100	99
>lcl|NC_004629.1_cds_NP_803592.1_26 [gene=PHIKZ026] [protein=ORF026] [protein_id=NP_803592.1] [location=complement(14877..16535)]	27.748	97	99.819	99
>lcl|NC_004629.1_cds_NP_803593.1_27 [gene=PHIKZ027] [protein=ORF027] [protein_id=NP_803593.1] [location=complement(16532..19228)]	24.472	98	100	99
>lcl|NC_004629.1_cds_NP_803594.1_28 [gene=PHIKZ028] [protein=ORF028] [protein_id=NP_803594.1] [location=complement(19245..20207)]	48.879	69	99.057	99
>lcl|NC_004629.1_cds_NP_803595.1_29 [gene=PHIKZ029] [protein=ORF029] [protein_id=NP_803595.1] [location=20336..22423]	24.777	73	99.416	98
>lcl|NC_004629.1_cds_NP_803596.1_30 [gene=PHIKZ030] [protein=ORF030] [protein_id=NP_803596.1] [location=22455..23336]	21.687	83	100	99
>lcl|NC_004629.1_cds_NP_803597.1_31 [gene=PHIKZ031] [protein=ORF031] [protein_id=NP_803597.1] [location=23646..24842]	100	99	100	99
>lcl|NC_004629.1_cds_NP_803598.1_32 [gene=PHIKZ032] [protein=ORF032] [protein_id=NP_803598.1] [location=complement(25242..26516)]	26.253	97	99.764	99
>lcl|NC_004629.1_cds_NP_803599.1_33 [gene=PHIKZ033] [protein=ORF033] [protein_id=NP_803599.1] [location=26571..27440]	100	99	95.156	99
>lcl|NC_004629.1_cds_NP_803600.1_34 [gene=PHIKZ034] [protein=ORF034] [protein_id=NP_803600.1] [location=27747..28517]	40.075	99	0	0
>lcl|NC_004629.1_cds_NP_803601.1_35 [gene=PHIKZ035] [protein=ORF035] [protein_id=NP_803601.1] [location=28527..29342]	100	99	0	0
>lcl|NC_004629.1_cds_NP_803602.1_36 [gene=PHIKZ036] [protein=ORF036] [protein_id=NP_803602.1] [location=29446..30261]	100	99	0	0
>lcl|NC_004629.1_cds_NP_803603.1_37 [gene=PHIKZ037] [protein=ORF037] [protein_id=NP_803603.1] [location=30298..31119]	100	99	0	0
>lcl|NC_004629.1_cds_NP_803604.1_38 [gene=PHIKZ038] [protein=ORF038] [protein_id=NP_803604.1] [location=31367..31879]	26.897	83	0	0
>lcl|NC_004629.1_cds_NP_803605.1_39 [gene=PHIKZ039] [protein=ORF039] [protein_id=NP_803605.1] [location=31930..32913]	31.118	98	0	0
>lcl|NC_004629.1_cds_NP_803606.1_40 [gene=PHIKZ040] [protein=ORF040] [protein_id=NP_803606.1] [location=32968..33450]	41.414	61	36.496	83
>lcl|NC_004629.1_cds_NP_803607.1_41 [gene=PHIKZ041] [protein=ORF041] [protein_id=NP_803607.1] [location=33490..33963]	40.909	70	0	0
>lcl|NC_004629.1_cds_NP_803608.1_42 [gene=PHIKZ042] [protein=ORF042] [protein_id=NP_803608.1] [location=complement(34962..35762)]	23.929	99	28.679	98
>lcl|NC_004629.1_cds_NP_803609.1_43 [gene=PHIKZ043] [protein=ORF043] [protein_id=NP_803609.1] [location=36341..37414]	25.275	97	0	0
>lcl|NC_004629.1_cds_NP_803610.1_44 [gene=PHIKZ044] [protein=ORF044] [protein_id=NP_803610.1] [location=37464..37853]	100	92	0	0
>lcl|NC_004629.1_cds_NP_803611.1_45 [gene=PHIKZ045] [protein=ORF045] [protein_id=NP_803611.1] [location=38102..38560]	100	12	0	0
>lcl|NC_004629.1_cds_NP_803612.1_46 [gene=PHIKZ046] [protein=ORF046] [protein_id=NP_803612.1] [location=38502..38936]	100	12	0	0
>lcl|NC_004629.1_cds_NP_803613.1_47 [gene=PHIKZ047] [protein=ORF047] [protein_id=NP_803613.1] [location=38933..39469]	31	56	0	0
>lcl|NC_004629.1_cds_NP_803614.1_48 [gene=PHIKZ048] [protein=ORF048] [protein_id=NP_803614.1] [location=39542..39925]	100	99	99.213	99
>lcl|NC_004629.1_cds_NP_803615.1_49 [gene=PHIKZ049] [protein=ORF049] [protein_id=NP_803615.1] [location=39960..40376]	44.444	97	99.275	99
>lcl|NC_004629.1_cds_NP_803616.1_50 [gene=PHIKZ050] [protein=ORF050] [protein_id=NP_803616.1] [location=40578..42773]	30.484	95	98.358	99
>lcl|NC_004629.1_cds_NP_803617.1_51 [gene=PHIKZ051] [protein=ORF051] [protein_id=NP_803617.1] [location=43035..43754]	100	99	95.397	99
>lcl|NC_004629.1_cds_NP_803618.1_52 [gene=PHIKZ052] [protein=ORF052] [protein_id=NP_803618.1] [location=complement(43798..44889)]	55.161	85	99.725	99
>lcl|NC_004629.1_cds_NP_803619.1_53 [gene=PHIKZ053] [protein=ORF053] [protein_id=NP_803619.1] [location=44971..45336]	100	99	94.215	99
>lcl|NC_004629.1_cds_NP_803620.1_54 [gene=PHIKZ054] [protein=ORF054] [protein_id=NP_803620.1] [location=45648..47528]	41.99	94	99.201	99
>lcl|NC_004629.1_cds_NP_803621.1_55 [gene=PHIKZ055] [protein=ORF055] [protein_id=NP_803621.1] [location=47923..49185]	20.507	97	98.807	99
>lcl|NC_004629.1_cds_NP_803622.1_56 [gene=PHIKZ056] [protein=ORF056] [protein_id=NP_803622.1] [location=49201..50205]	32.432	33	41.007	41
>lcl|NC_004629.1_cds_NP_803623.1_57 [gene=PHIKZ057] [protein=ORF057] [protein_id=NP_803623.1] [location=50810..51193]	100	99	87.402	99
>lcl|NC_004629.1_cds_NP_803624.1_58 [gene=PHIKZ058] [protein=ORF058] [protein_id=NP_803624.1] [location=51206..51631]	100	99	96.454	99
>lcl|NC_004629.1_cds_NP_803625.1_59 [gene=PHIKZ059] [protein=ORF059] [protein_id=NP_803625.1] [location=52006..52617]	30.159	90	99.507	99
>lcl|NC_004629.1_cds_NP_803626.1_60 [gene=PHIKZ060] [protein=ORF060] [protein_id=NP_803626.1] [location=52669..53004]	100	99	98.198	99
>lcl|NC_004629.1_cds_NP_803627.1_61 [gene=PHIKZ061] [protein=ORF061] [protein_id=NP_803627.1] [location=52991..53455]	100	99	95.455	99
>lcl|NC_004629.1_cds_NP_803628.1_62 [gene=PHIKZ062] [protein=ORF062] [protein_id=NP_803628.1] [location=53549..53959]	31.111	66	100	99
>lcl|NC_004629.1_cds_NP_803629.1_63 [gene=PHIKZ063] [protein=ORF063] [protein_id=NP_803629.1] [location=53960..54517]	20.183	59	98.919	99
>lcl|NC_004629.1_cds_NP_803630.1_64 [gene=PHIKZ064] [protein=ORF064] [protein_id=NP_803630.1] [location=54552..55100]	30.769	84	98.352	99
>lcl|NC_004629.1_cds_NP_803631.1_65 [gene=PHIKZ065] [protein=ORF065] [protein_id=NP_803631.1] [location=55063..56229]	29.947	94	100	92
>lcl|NC_004629.1_cds_NP_803632.1_66 [gene=PHIKZ066] [protein=ORF066] [protein_id=NP_803632.1] [location=56242..57072]	31.439	92	99.638	99
>lcl|NC_004629.1_cds_NP_803633.1_67 [gene=PHIKZ067] [protein=ORF067] [protein_id=NP_803633.1] [location=57159..57899]	52.764	80	100	99
>lcl|NC_004629.1_cds_NP_803634.1_68 [gene=PHIKZ068] [protein=ORF068] [protein_id=NP_803634.1] [location=58025..59590]	49.526	99	99.808	99
>lcl|NC_004629.1_cds_NP_803635.1_69 [gene=PHIKZ069] [protein=ORF069] [protein_id=NP_803635.1] [location=59607..61280]	47.834	97	99.82	99
>lcl|NC_004629.1_cds_NP_803636.1_70 [gene=PHIKZ070] [protein=ORF070] [protein_id=NP_803636.1] [location=61327..62628]	23.913	58	100	99
>lcl|NC_004629.1_cds_NP_803637.1_71 [gene=PHIKZ071] [protein=ORF071] [protein_id=NP_803637.1] [location=63275..64459]	23.704	98	98.985	99
>lcl|NC_004629.1_cds_NP_803638.1_72 [gene=PHIKZ072] [protein=ORF072] [protein_id=NP_803638.1] [location=64486..65436]	40.625	20	34.532	44
>lcl|NC_004629.1_cds_NP_803639.1_73 [gene=PHIKZ073] [protein=ORF073] [protein_id=NP_803639.1] [location=65693..66595]	23.077	98	100	99
>lcl|NC_004629.1_cds_NP_803640.1_74 [gene=PHIKZ074] [protein=ORF074] [protein_id=NP_803640.1] [location=66626..68659]	23.326	61	100	99
>lcl|NC_004629.1_cds_NP_803641.1_75 [gene=PHIKZ075] [protein=ORF075] [protein_id=NP_803641.1] [location=68643..70256]	28.679	48	99.805	95
>lcl|NC_004629.1_cds_NP_803642.1_76 [gene=PHIKZ076] [protein=ORF076] [protein_id=NP_803642.1] [location=70441..70698]	100	99	0	0
>lcl|NC_004629.1_cds_NP_803643.1_77 [gene=PHIKZ077] [protein=ORF077] [protein_id=NP_803643.1] [location=complement(71903..73504)]	40.244	91	99.625	99
>lcl|NC_004629.1_cds_NP_803644.1_78 [gene=PHIKZ078] [protein=ORF078] [protein_id=NP_803644.1] [location=complement(73516..74010)]	28.671	87	98.78	99
>lcl|NC_004629.1_cds_NP_803645.1_79 [gene=PHIKZ079] [protein=ORF079] [protein_id=NP_803645.1] [location=74148..75038]	38.112	96	99.324	99
>lcl|NC_004629.1_cds_NP_803646.1_80 [gene=PHIKZ080] [protein=ORF080] [protein_id=NP_803646.1] [location=75025..76374]	24.667	98	99.777	99
>lcl|NC_004629.1_cds_NP_803647.1_81 [gene=PHIKZ081] [protein=ORF081] [protein_id=NP_803647.1] [location=76437..77858]	31.01	58	98.943	99
>lcl|NC_004629.1_cds_NP_803648.1_82 [gene=PHIKZ082] [protein=ORF082] [protein_id=NP_803648.1] [location=77960..79876]	24.883	98	98.276	99
>lcl|NC_004629.1_cds_NP_803649.1_83 [gene=PHIKZ083] [protein=ORF083] [protein_id=NP_803649.1] [location=complement(80347..81861)]	31.944	14	99.008	99
>lcl|NC_004629.1_cds_NP_803650.1_84 [gene=PHIKZ084] [protein=ORF084] [protein_id=NP_803650.1] [location=81963..83204]	34.101	98	100	99
>lcl|NC_004629.1_cds_NP_803651.1_85 [gene=PHIKZ085] [protein=ORF085] [protein_id=NP_803651.1] [location=83216..83665]	33.103	97	100	99
>lcl|NC_004629.1_cds_NP_803652.1_86 [gene=PHIKZ086] [protein=ORF086] [protein_id=NP_803652.1] [location=83658..84944]	24.451	83	99.526	98
>lcl|NC_004629.1_cds_NP_803653.1_87 [gene=PHIKZ087] [protein=ORF087] [protein_id=NP_803653.1] [location=complement(84986..87901)]	24.975	99	99.897	99
>lcl|NC_004629.1_cds_NP_803654.1_88 [gene=PHIKZ088] [protein=ORF088] [protein_id=NP_803654.1] [location=complement(87905..88954)]	26.687	92	100	99
>lcl|NC_004629.1_cds_NP_803655.1_89 [gene=PHIKZ089] [protein=ORF089] [protein_id=NP_803655.1] [location=88994..90157]	26.05	89	100	99
>lcl|NC_004629.1_cds_NP_803656.1_90 [gene=PHIKZ090] [protein=ORF090] [protein_id=NP_803656.1] [location=90168..91097]	47.119	95	100	99
>lcl|NC_004629.1_cds_NP_803657.1_91 [gene=PHIKZ091] [protein=ORF091] [protein_id=NP_803657.1] [location=91097..91642]	51.176	92	100	99
>lcl|NC_004629.1_cds_NP_803658.1_92 [gene=PHIKZ092] [protein=ORF092] [protein_id=NP_803658.1] [location=91652..92974]	34.831	80	99.761	95
>lcl|NC_004629.1_cds_NP_803659.1_93 [gene=PHIKZ093] [protein=ORF093] [protein_id=NP_803659.1] [location=92980..94287]	40.426	11	99.527	97
>lcl|NC_004629.1_cds_NP_803660.1_94 [gene=PHIKZ094] [protein=ORF094] [protein_id=NP_803660.1] [location=94357..95874]	40.196	19	98.614	99
>lcl|NC_004629.1_cds_NP_803661.1_95 [gene=PHIKZ095] [protein=ORF095] [protein_id=NP_803661.1] [location=95962..97605]	40.845	12	99.086	99
>lcl|NC_004629.1_cds_NP_803662.1_96 [gene=PHIKZ096] [protein=ORF096] [protein_id=NP_803662.1] [location=97667..98782]	27.397	94	100	99
>lcl|NC_004629.1_cds_NP_803663.1_97 [gene=PHIKZ097] [protein=ORF097] [protein_id=NP_803663.1] [location=98882..101332]	29.345	42	98.085	58
>lcl|NC_004629.1_cds_NP_803664.1_98 [gene=PHIKZ098] [protein=ORF098] [protein_id=NP_803664.1] [location=101416..103044]	42.545	99	100	99
>lcl|NC_004629.1_cds_NP_803665.1_99 [gene=PHIKZ099] [protein=ORF099] [protein_id=NP_803665.1] [location=103044..104453]	22.436	94	100	99
>lcl|NC_004629.1_cds_NP_803666.1_100 [gene=PHIKZ100] [protein=ORF100] [protein_id=NP_803666.1] [location=104458..105039]	38.298	95	100	99
>lcl|NC_004629.1_cds_NP_803667.1_101 [gene=PHIKZ101] [protein=ORF101] [protein_id=NP_803667.1] [location=105041..106423]	27.297	78	100	99
>lcl|NC_004629.1_cds_NP_803668.1_102 [gene=PHIKZ102] [protein=ORF102] [protein_id=NP_803668.1] [location=106448..106870]	24.603	89	100	99
>lcl|NC_004629.1_cds_NP_803669.1_103 [gene=PHIKZ103] [protein=ORF103] [protein_id=NP_803669.1] [location=107044..107436]	100	99	100	99
>lcl|NC_004629.1_cds_NP_803670.1_104 [gene=PHIKZ104] [protein=ORF104] [protein_id=NP_803670.1] [location=107517..108005]	62.5	98	100	99
>lcl|NC_004629.1_cds_NP_803671.1_105 [gene=PHIKZ105] [protein=ORF105] [protein_id=NP_803671.1] [location=108129..108575]	100	99	100	99
>lcl|NC_004629.1_cds_NP_803672.1_106 [gene=PHIKZ106] [protein=ORF106] [protein_id=NP_803672.1] [location=108610..108948]	100	99	100	99
>lcl|NC_004629.1_cds_NP_803673.1_107 [gene=PHIKZ107] [protein=ORF107] [protein_id=NP_803673.1] [location=109264..109581]	100	99	100	99
>lcl|NC_004629.1_cds_NP_803674.1_108 [gene=PHIKZ108] [protein=ORF108] [protein_id=NP_803674.1] [location=110100..110456]	100	99	100	99
>lcl|NC_004629.1_cds_NP_803675.1_109 [gene=PHIKZ109] [protein=ORF109] [protein_id=NP_803675.1] [location=110467..110889]	100	99	100	99
>lcl|NC_004629.1_cds_NP_803676.1_110 [gene=PHIKZ110] [protein=ORF110] [protein_id=NP_803676.1] [location=111248..111631]	100	99	100	99
>lcl|NC_004629.1_cds_NP_803677.1_111 [gene=PHIKZ111] [protein=ORF111] [protein_id=NP_803677.1] [location=111667..112164]	100	99	98.63	88
>lcl|NC_004629.1_cds_NP_803678.1_112 [gene=PHIKZ112] [protein=ORF112] [protein_id=NP_803678.1] [location=112206..112481]	42.553	51	100	99
>lcl|NC_004629.1_cds_NP_803679.1_113 [gene=PHIKZ113] [protein=ORF113] [protein_id=NP_803679.1] [location=112527..112790]	32.203	67	100	99
>lcl|NC_004629.1_cds_NP_803680.1_114 [gene=PHIKZ114] [protein=ORF114] [protein_id=NP_803680.1] [location=112798..113082]	100	99	0	0
>lcl|NC_004629.1_cds_NP_803681.1_115 [gene=PHIKZ115] [protein=ORF115] [protein_id=NP_803681.1] [location=113086..113373]	32.203	61	100	78
>lcl|NC_004629.1_cds_NP_803682.1_116 [gene=PHIKZ116] [protein=ORF116] [protein_id=NP_803682.1] [location=113925..114200]	100	99	98.901	99
>lcl|NC_004629.1_cds_NP_803683.1_117 [gene=PHIKZ117] [protein=ORF117] [protein_id=NP_803683.1] [location=114366..114671]	100	30	0	0
>lcl|NC_004629.1_cds_NP_803684.1_118 [gene=PHIKZ118] [protein=ORF118] [protein_id=NP_803684.1] [location=complement(115975..117522)]	37.681	13	100	99
>lcl|NC_004629.1_cds_NP_803685.1_119 [gene=PHIKZ119] [protein=ORF119] [protein_id=NP_803685.1] [location=117662..118195]	52.247	99	100	99
>lcl|NC_004629.1_cds_NP_803686.1_120 [gene=PHIKZ120] [protein=ORF120] [protein_id=NP_803686.1] [location=118268..120511]	21.978	35	100	97
>lcl|NC_004629.1_cds_NP_803687.1_121 [gene=PHIKZ121] [protein=ORF121] [protein_id=NP_803687.1] [location=120708..121160]	100	99	98.387	82
>lcl|NC_004629.1_cds_NP_803688.1_122 [gene=PHIKZ122] [protein=ORF122] [protein_id=NP_803688.1] [location=121117..122199]	26.722	98	100	99
>lcl|NC_004629.1_cds_NP_803689.1_123 [gene=PHIKZ123] [protein=ORF123] [protein_id=NP_803689.1] [location=122209..123840]	18.634	56	99.816	99
>lcl|NC_004629.1_cds_NP_803690.1_124 [gene=PHIKZ124] [protein=ORF124] [protein_id=NP_803690.1] [location=123876..126041]	41.667	23	99.723	99
>lcl|NC_004629.1_cds_NP_803691.1_125 [gene=PHIKZ125] [protein=ORF125] [protein_id=NP_803691.1] [location=126122..126754]	26.136	78	99.524	99
>lcl|NC_004629.1_cds_NP_803692.1_126 [gene=PHIKZ126] [protein=ORF126] [protein_id=NP_803692.1] [location=complement(126819..127262)]	40	57	97.279	99
>lcl|NC_004629.1_cds_NP_803693.1_127 [gene=PHIKZ127] [protein=ORF127] [protein_id=NP_803693.1] [location=complement(127271..128143)]	37.113	99	98.966	99
>lcl|NC_004629.1_cds_NP_803694.1_128 [gene=PHIKZ128] [protein=ORF128] [protein_id=NP_803694.1] [location=complement(128154..130328)]	29.685	82	99.862	99
>lcl|NC_004629.1_cds_NP_803695.1_129 [gene=PHIKZ129] [protein=ORF129] [protein_id=NP_803695.1] [location=130364..133054]	54.054	4	100	97
>lcl|NC_004629.1_cds_NP_803696.1_130 [gene=PHIKZ130] [protein=ORF130] [protein_id=NP_803696.1] [location=complement(133101..134384)]	22.569	64	100	99
>lcl|NC_004629.1_cds_NP_803697.1_131 [gene=PHIKZ131] [protein=ORF131] [protein_id=NP_803697.1] [location=134482..136797]	26.316	15	100	99
>lcl|NC_004629.1_cds_NP_803698.1_132 [gene=PHIKZ132] [protein=ORF132] [protein_id=NP_803698.1] [location=136810..137142]	36.207	51	100	99
>lcl|NC_004629.1_cds_NP_803699.1_133 [gene=PHIKZ133] [protein=ORF133] [protein_id=NP_803699.1] [location=137217..138605]	30.556	15	99.784	99
>lcl|NC_004629.1_cds_NP_803700.1_134 [gene=PHIKZ134] [protein=ORF134] [protein_id=NP_803700.1] [location=138617..139990]	23.239	61	100	99
>lcl|NC_004629.1_cds_NP_803701.1_135 [gene=PHIKZ135] [protein=ORF135] [protein_id=NP_803701.1] [location=139990..141381]	22.609	48	100	99
>lcl|NC_004629.1_cds_NP_803702.1_136 [gene=PHIKZ136] [protein=ORF136] [protein_id=NP_803702.1] [location=141381..141983]	35.2	60	100	99
>lcl|NC_004629.1_cds_NP_803703.1_137 [gene=PHIKZ137] [protein=ORF137] [protein_id=NP_803703.1] [location=141934..142416]	60.952	65	98.649	92
>lcl|NC_004629.1_cds_NP_803704.1_138 [gene=PHIKZ138] [protein=ORF138] [protein_id=NP_803704.1] [location=142425..142913]	42.446	85	100	99
>lcl|NC_004629.1_cds_NP_803705.1_139 [gene=PHIKZ139] [protein=ORF139] [protein_id=NP_803705.1] [location=143009..143905]	29.787	92	100	99
>lcl|NC_004629.1_cds_NP_803706.1_140 [gene=PHIKZ140] [protein=ORF140] [protein_id=NP_803706.1] [location=143908..144471]	50.82	97	100	99
>lcl|NC_004629.1_cds_NP_803707.1_141 [gene=PHIKZ141] [protein=ORF141] [protein_id=NP_803707.1] [location=144487..144993]	28.743	93	100	99
>lcl|NC_004629.1_cds_NP_803708.1_142 [gene=PHIKZ142] [protein=ORF142] [protein_id=NP_803708.1] [location=145215..145610]	29.545	98	100	99
>lcl|NC_004629.1_cds_NP_803709.1_143 [gene=PHIKZ143] [protein=ORF143] [protein_id=NP_803709.1] [location=145693..146226]	45.198	99	98.87	99
>lcl|NC_004629.1_cds_NP_803710.1_144 [gene=PHIKZ144] [protein=ORF144] [protein_id=NP_803710.1] [location=146288..147070]	49.206	24	100	99
>lcl|NC_004629.1_cds_NP_803711.1_145 [gene=PHIKZ145] [protein=ORF145] [protein_id=NP_803711.1] [location=147276..149645]	54.054	5	99.493	99
>lcl|NC_004629.1_cds_NP_803712.1_146 [gene=PHIKZ146] [protein=ORF146] [protein_id=NP_803712.1] [location=149645..152926]	69.231	2	97.896	99
>lcl|NC_004629.1_cds_NP_803713.1_147 [gene=PHIKZ147] [protein=ORF147] [protein_id=NP_803713.1] [location=complement(153059..153775)]	41.453	98	100	99
>lcl|NC_004629.1_cds_NP_803714.1_148 [gene=PHIKZ148] [protein=ORF148] [protein_id=NP_803714.1] [location=complement(153765..154271)]	25	85	100	99
>lcl|NC_004629.1_cds_NP_803715.1_149 [gene=PHIKZ149] [protein=ORF149] [protein_id=NP_803715.1] [location=complement(154274..154948)]	30.928	86	100	99
>lcl|NC_004629.1_cds_NP_803716.1_150 [gene=PHIKZ150] [protein=ORF150] [protein_id=NP_803716.1] [location=complement(154981..155301)]	40.566	99	100	99
>lcl|NC_004629.1_cds_NP_803717.1_151 [gene=PHIKZ151] [protein=ORF151] [protein_id=NP_803717.1] [location=complement(155325..155675)]	47.368	97	100	99
>lcl|NC_004629.1_cds_NP_803718.1_152 [gene=PHIKZ152] [protein=ORF152] [protein_id=NP_803718.1] [location=complement(155752..157191)]	26.726	88	100	99
>lcl|NC_004629.1_cds_NP_803719.1_153 [gene=PHIKZ153] [protein=ORF153] [protein_id=NP_803719.1] [location=157289..158203]	27.885	98	100	99
>lcl|NC_004629.1_cds_NP_803720.1_154 [gene=PHIKZ154] [protein=ORF154] [protein_id=NP_803720.1] [location=complement(158250..158735)]	100	10	98.214	35
>lcl|NC_004629.1_cds_NP_803721.1_155 [gene=PHIKZ155] [protein=ORF155] [protein_id=NP_803721.1] [location=complement(158680..160128)]	100	4	100	99
>lcl|NC_004629.1_cds_NP_803722.1_156 [gene=PHIKZ156] [protein=ORF156] [protein_id=NP_803722.1] [location=complement(160184..160597)]	30.147	95	99.038	75
>lcl|NC_004629.1_cds_NP_803723.1_157 [gene=PHIKZ157] [protein=ORF157] [protein_id=NP_803723.1] [location=161075..162412]	23.714	99	100	99
>lcl|NC_004629.1_cds_NP_803724.1_158 [gene=PHIKZ158] [protein=ORF158] [protein_id=NP_803724.1] [location=162468..163418]	37.654	51	100	99
>lcl|NC_004629.1_cds_NP_803725.1_159 [gene=PHIKZ159] [protein=ORF159] [protein_id=NP_803725.1] [location=163400..163819]	26.4	89	100	89
>lcl|NC_004629.1_cds_NP_803726.1_160 [gene=PHIKZ160] [protein=ORF160] [protein_id=NP_803726.1] [location=163823..164296]	25	98	100	99
>lcl|NC_004629.1_cds_NP_803727.1_161 [gene=PHIKZ161] [protein=ORF161] [protein_id=NP_803727.1] [location=164395..165030]	29.57	85	100	99
>lcl|NC_004629.1_cds_NP_803728.1_162 [gene=PHIKZ162] [protein=ORF162] [protein_id=NP_803728.1] [location=165066..166634]	28.198	65	100	99
>lcl|NC_004629.1_cds_NP_803729.1_163 [gene=PHIKZ163] [protein=ORF163] [protein_id=NP_803729.1] [location=166644..167831]	19.685	87	100	99
>lcl|NC_004629.1_cds_NP_803730.1_164 [gene=PHIKZ164] [protein=ORF164] [protein_id=NP_803730.1] [location=complement(168147..169040)]	28	79	100	98
>lcl|NC_004629.1_cds_NP_803731.1_165 [gene=PHIKZ165] [protein=ORF165] [protein_id=NP_803731.1] [location=169093..171585]	21.879	94	100	99
>lcl|NC_004629.1_cds_NP_803732.1_166 [gene=PHIKZ166] [protein=ORF166] [protein_id=NP_803732.1] [location=171896..172291]	100	99	100	99
>lcl|NC_004629.1_cds_NP_803733.1_167 [gene=PHIKZ167] [protein=ORF167] [protein_id=NP_803733.1] [location=172658..173086]	100	99	100	99
>lcl|NC_004629.1_cds_NP_803734.1_168 [gene=PHIKZ168] [protein=ORF168] [protein_id=NP_803734.1] [location=173136..173792]	100	99	100	99
>lcl|NC_004629.1_cds_NP_803735.1_169 [gene=PHIKZ169] [protein=ORF169] [protein_id=NP_803735.1] [location=complement(173838..174353)]	31.757	85	100	99
>lcl|NC_004629.1_cds_NP_803736.1_170 [gene=PHIKZ170] [protein=ORF170] [protein_id=NP_803736.1] [location=174433..174957]	23.837	98	100	99
>lcl|NC_004629.1_cds_NP_803737.1_171 [gene=PHIKZ171] [protein=ORF171] [protein_id=NP_803737.1] [location=175028..175789]	49.603	98	100	86
>lcl|NC_004629.1_cds_NP_803738.1_172 [gene=PHIKZ172] [protein=ORF172] [protein_id=NP_803738.1] [location=175782..176222]	31.304	78	100	99
>lcl|NC_004629.1_cds_NP_803739.1_173 [gene=PHIKZ173] [protein=ORF173] [protein_id=NP_803739.1] [location=176179..177153]	100	98	100	95
>lcl|NC_004629.1_cds_NP_803740.1_174 [gene=PHIKZ174] [protein=ORF174] [protein_id=NP_803740.1] [location=177236..178300]	21.239	90	99.718	99
>lcl|NC_004629.1_cds_NP_803741.1_175 [gene=PHIKZ175] [protein=ORF175] [protein_id=NP_803741.1] [location=complement(178350..179162)]	29.63	74	100	99
>lcl|NC_004629.1_cds_NP_803742.1_176 [gene=PHIKZ176] [protein=ORF176] [protein_id=NP_803742.1] [location=complement(179174..179902)]	25.833	98	100	99
>lcl|NC_004629.1_cds_NP_803743.1_177 [gene=PHIKZ177] [protein=ORF177] [protein_id=NP_803743.1] [location=complement(180050..181609)]	41.104	94	100	99
>lcl|NC_004629.1_cds_NP_803744.1_178 [gene=PHIKZ178] [protein=ORF178] [protein_id=NP_803744.1] [location=complement(181802..186157)]	31.868	25	100	99
>lcl|NC_004629.1_cds_NP_803745.1_179 [gene=PHIKZ179] [protein=ORF179] [protein_id=NP_803745.1] [location=complement(186660..187733)]	31.818	30	20.973	83
>lcl|NC_004629.1_cds_NP_803746.1_180 [gene=PHIKZ180] [protein=ORF180] [protein_id=NP_803746.1] [location=complement(187786..189258)]	32.311	99	99.796	99
>lcl|NC_004629.1_cds_NP_803747.1_181 [gene=PHIKZ181] [protein=ORF181] [protein_id=NP_803747.1] [location=189334..196047]	23.944	12	98.972	99
>lcl|NC_004629.1_cds_NP_803748.1_182 [gene=PHIKZ182] [protein=ORF182] [protein_id=NP_803748.1] [location=196103..198097]	27.984	36	99.849	99
>lcl|NC_004629.1_cds_NP_803749.1_183 [gene=PHIKZ183] [protein=ORF183] [protein_id=NP_803749.1] [location=198156..198461]	100	99	100	99
>lcl|NC_004629.1_cds_NP_803750.1_184 [gene=PHIKZ184] [protein=ORF184] [protein_id=NP_803750.1] [location=198469..199161]	53.571	24	96.087	99
>lcl|NC_004629.1_cds_NP_803751.1_185 [gene=PHIKZ185] [protein=ORF185] [protein_id=NP_803751.1] [location=199270..199824]	100	99	78.261	99
>lcl|NC_004629.1_cds_NP_803752.1_186 [gene=PHIKZ186] [protein=ORF186] [protein_id=NP_803752.1] [location=200099..200503]	28.462	96	97.015	99
>lcl|NC_004629.1_cds_NP_803753.1_187 [gene=PHIKZ187] [protein=ORF187] [protein_id=NP_803753.1] [location=200624..200953]	100	99	100	99
>lcl|NC_004629.1_cds_NP_803754.1_188 [gene=PHIKZ188] [protein=ORF188] [protein_id=NP_803754.1] [location=200956..202014]	26.214	56	100	99
>lcl|NC_004629.1_cds_NP_803755.1_189 [gene=PHIKZ189] [protein=ORF189] [protein_id=NP_803755.1] [location=202052..202303]	42.667	89	100	99
>lcl|NC_004629.1_cds_NP_803756.1_190 [gene=PHIKZ190] [protein=ORF190] [protein_id=NP_803756.1] [location=202373..202813]	99.315	99	96.575	99
>lcl|NC_004629.1_cds_NP_803757.1_191 [gene=PHIKZ191] [protein=ORF191] [protein_id=NP_803757.1] [location=202841..203632]	100	99	98.069	98
>lcl|NC_004629.1_cds_NP_803758.1_192 [gene=PHIKZ192] [protein=ORF192] [protein_id=NP_803758.1] [location=203640..204350]	31.019	91	84.746	99
>lcl|NC_004629.1_cds_NP_803759.1_193 [gene=PHIKZ193] [protein=ORF193] [protein_id=NP_803759.1] [location=204350..204712]	100	99	85	99
>lcl|NC_004629.1_cds_NP_803760.1_194 [gene=PHIKZ194] [protein=ORF194] [protein_id=NP_803760.1] [location=204725..205081]	26.786	93	93.22	99
>lcl|NC_004629.1_cds_NP_803761.1_195 [gene=PHIKZ195] [protein=ORF195] [protein_id=NP_803761.1] [location=205231..205605]	100	99	96.774	99
>lcl|NC_004629.1_cds_NP_803762.1_196 [gene=PHIKZ196] [protein=ORF196] [protein_id=NP_803762.1] [location=205607..205969]	64.167	99	85	99
>lcl|NC_004629.1_cds_NP_803763.1_197 [gene=PHIKZ197] [protein=ORF197] [protein_id=NP_803763.1] [location=205981..206343]	57.426	83	98.333	99
>lcl|NC_004629.1_cds_NP_803764.1_198 [gene=PHIKZ198] [protein=ORF198] [protein_id=NP_803764.1] [location=206484..206972]	41.975	99	100	99
>lcl|NC_004629.1_cds_NP_803765.1_199 [gene=PHIKZ199] [protein=ORF199] [protein_id=NP_803765.1] [location=207063..207494]	60.284	98	100	99
>lcl|NC_004629.1_cds_NP_803766.1_200 [gene=PHIKZ200] [protein=ORF200] [protein_id=NP_803766.1] [location=207514..208173]	36.652	98	99.451	83
>lcl|NC_004629.1_cds_NP_803767.1_201 [gene=PHIKZ201] [protein=ORF201] [protein_id=NP_803767.1] [location=complement(208214..210163)]	33.569	41	99.686	98
>lcl|NC_004629.1_cds_NP_803768.1_202 [gene=PHIKZ202] [protein=ORF202] [protein_id=NP_803768.1] [location=complement(210174..210644)]	100	99	99.359	99
>lcl|NC_004629.1_cds_NP_803769.1_203 [gene=PHIKZ203] [protein=ORF203] [protein_id=NP_803769.1] [location=complement(210656..212767)]	30.452	70	100	99
>lcl|NC_004629.1_cds_NP_803770.1_204 [gene=PHIKZ204] [protein=ORF204] [protein_id=NP_803770.1] [location=213118..213513]	100	99	100	99
>lcl|NC_004629.1_cds_NP_803771.1_205 [gene=PHIKZ205] [protein=ORF205] [protein_id=NP_803771.1] [location=213678..214079]	100	99	100	99
>lcl|NC_004629.1_cds_NP_803772.1_206 [gene=PHIKZ206] [protein=ORF206] [protein_id=NP_803772.1] [location=214322..215032]	23.856	98	100	99
>lcl|NC_004629.1_cds_NP_803773.1_207 [gene=PHIKZ207] [protein=ORF207] [protein_id=NP_803773.1] [location=215032..215685]	44.601	95	100	99
>lcl|NC_004629.1_cds_NP_803774.1_208 [gene=PHIKZ208] [protein=ORF208] [protein_id=NP_803774.1] [location=215789..216889]	100	99	100	99
>lcl|NC_004629.1_cds_NP_803775.1_209 [gene=PHIKZ209] [protein=ORF209] [protein_id=NP_803775.1] [location=216997..217599]	30.556	34	99.5	99
>lcl|NC_004629.1_cds_NP_803776.1_210 [gene=PHIKZ210] [protein=ORF210] [protein_id=NP_803776.1] [location=217727..218059]	37.895	85	99.091	99
>lcl|NC_004629.1_cds_NP_803777.1_211 [gene=PHIKZ211] [protein=ORF211] [protein_id=NP_803777.1] [location=218592..219011]	100	99	99.281	99
>lcl|NC_004629.1_cds_NP_803778.1_212 [gene=PHIKZ212] [protein=ORF212] [protein_id=NP_803778.1] [location=219008..219352]	100	99	99.123	99
>lcl|NC_004629.1_cds_NP_803779.1_213 [gene=PHIKZ213] [protein=ORF213] [protein_id=NP_803779.1] [location=219357..219905]	100	98	100	99
>lcl|NC_004629.1_cds_NP_803780.1_214 [gene=PHIKZ214] [protein=ORF214] [protein_id=NP_803780.1] [location=219929..220498]	42.347	98	100	99
>lcl|NC_004629.1_cds_NP_803781.1_215 [gene=PHIKZ215] [protein=ORF215] [protein_id=NP_803781.1] [location=220501..220737]	100	99	100	99
>lcl|NC_004629.1_cds_NP_803782.1_216 [gene=PHIKZ216] [protein=ORF216] [protein_id=NP_803782.1] [location=220828..221304]	32.53	50	100	99
>lcl|NC_004629.1_cds_NP_803783.1_217 [gene=PHIKZ217] [protein=ORF217] [protein_id=NP_803783.1] [location=221363..221554]	100	83	100	98
>lcl|NC_004629.1_cds_NP_803784.1_218 [gene=PHIKZ218] [protein=ORF218] [protein_id=NP_803784.1] [location=221574..221789]	100	99	98.485	92
>lcl|NC_004629.1_cds_NP_803785.1_219 [gene=PHIKZ219] [protein=ORF219] [protein_id=NP_803785.1] [location=222249..223382]	100	99	96	99
>lcl|NC_004629.1_cds_NP_803786.1_220 [gene=PHIKZ220] [protein=ORF220] [protein_id=NP_803786.1] [location=223379..223849]	100	99	100	99
>lcl|NC_004629.1_cds_NP_803787.1_221 [gene=PHIKZ221] [protein=ORF221] [protein_id=NP_803787.1] [location=223952..224299]	100	99	100	99
>lcl|NC_004629.1_cds_NP_803788.1_222 [gene=PHIKZ222] [protein=ORF222] [protein_id=NP_803788.1] [location=224368..224700]	100	91	100	91
>lcl|NC_004629.1_cds_NP_803789.1_223 [gene=PHIKZ223] [protein=ORF223] [protein_id=NP_803789.1] [location=224889..225287]	31.959	71	100	99
>lcl|NC_004629.1_cds_NP_803790.1_224 [gene=PHIKZ224] [protein=ORF224] [protein_id=NP_803790.1] [location=225274..225708]	32.593	92	99.27	94
>lcl|NC_004629.1_cds_NP_803791.1_225 [gene=PHIKZ225] [protein=ORF225] [protein_id=NP_803791.1] [location=225684..226007]	100	92	100	54
>lcl|NC_004629.1_cds_NP_803792.1_226 [gene=PHIKZ226] [protein=ORF226] [protein_id=NP_803792.1] [location=226010..226339]	100	99	100	99
>lcl|NC_004629.1_cds_NP_803793.1_227 [gene=PHIKZ227] [protein=ORF227] [protein_id=NP_803793.1] [location=226349..226864]	100	99	100	99
>lcl|NC_004629.1_cds_NP_803794.1_228 [gene=PHIKZ228] [protein=ORF228] [protein_id=NP_803794.1] [location=226877..227476]	100	99	100	99
>lcl|NC_004629.1_cds_NP_803795.1_229 [gene=PHIKZ229] [protein=ORF229] [protein_id=NP_803795.1] [location=227533..227898]	39.344	99	100	93
>lcl|NC_004629.1_cds_NP_803796.1_230 [gene=PHIKZ230] [protein=ORF230] [protein_id=NP_803796.1] [location=227934..228251]	100	92	100	92
>lcl|NC_004629.1_cds_NP_803797.1_231 [gene=PHIKZ231] [protein=ORF231] [protein_id=NP_803797.1] [location=228809..229276]	100	99	100	99
>lcl|NC_004629.1_cds_NP_803798.1_232 [gene=PHIKZ232] [protein=ORF232] [protein_id=NP_803798.1] [location=229299..230207]	100	99	100	99
>lcl|NC_004629.1_cds_NP_803799.1_233 [gene=PHIKZ233] [protein=ORF233] [protein_id=NP_803799.1] [location=230470..231177]	100	99	100	99
>lcl|NC_004629.1_cds_NP_803800.1_234 [gene=PHIKZ234] [protein=ORF234] [protein_id=NP_803800.1] [location=231283..231576]	100	99	100	59
>lcl|NC_004629.1_cds_NP_803801.1_235 [gene=PHIKZ235] [protein=ORF235] [protein_id=NP_803801.1] [location=231804..233270]	45.614	99	100	99
>lcl|NC_004629.1_cds_NP_803802.1_236 [gene=PHIKZ236] [protein=ORF236] [protein_id=NP_803802.1] [location=233404..233811]	100	99	100	99
>lcl|NC_004629.1_cds_NP_803803.1_237 [gene=PHIKZ237] [protein=ORF237] [protein_id=NP_803803.1] [location=233811..234644]	100	99	99.639	99
>lcl|NC_004629.1_cds_NP_803804.1_238 [gene=PHIKZ238] [protein=ORF238] [protein_id=NP_803804.1] [location=234694..235194]	100	99	81.325	99
>lcl|NC_004629.1_cds_NP_803805.1_239 [gene=PHIKZ239] [protein=ORF239] [protein_id=NP_803805.1] [location=235869..236285]	100	99	94.286	25
>lcl|NC_004629.1_cds_NP_803806.1_240 [gene=PHIKZ240] [protein=ORF240] [protein_id=NP_803806.1] [location=236287..236769]	100	99	90.625	99
>lcl|NC_004629.1_cds_NP_803807.1_241 [gene=PHIKZ241] [protein=ORF241] [protein_id=NP_803807.1] [location=236899..237228]	100	99	99.083	99
>lcl|NC_004629.1_cds_NP_803808.1_242 [gene=PHIKZ242] [protein=ORF242] [protein_id=NP_803808.1] [location=237340..237777]	100	99	99.237	90
>lcl|NC_004629.1_cds_NP_803809.1_243 [gene=PHIKZ243] [protein=ORF243] [protein_id=NP_803809.1] [location=237798..238694]	100	99	94.631	99
>lcl|NC_004629.1_cds_NP_803810.1_244 [gene=PHIKZ244] [protein=ORF244] [protein_id=NP_803810.1] [location=238752..239108]	27.273	97	99.153	99
>lcl|NC_004629.1_cds_NP_803811.1_245 [gene=PHIKZ245] [protein=ORF245] [protein_id=NP_803811.1] [location=239159..239593]	33.636	74	100	99
>lcl|NC_004629.1_cds_NP_803812.1_246 [gene=PHIKZ246] [protein=ORF246] [protein_id=NP_803812.1] [location=239624..240280]	33.333	66	100	99
>lcl|NC_004629.1_cds_NP_803813.1_247 [gene=PHIKZ247] [protein=ORF247] [protein_id=NP_803813.1] [location=240689..241096]	100	99	99.259	99
>lcl|NC_004629.1_cds_NP_803814.1_248 [gene=PHIKZ248] [protein=ORF248] [protein_id=NP_803814.1] [location=241109..241468]	38.938	93	99.16	99
>lcl|NC_004629.1_cds_NP_803815.1_249 [gene=PHIKZ249] [protein=ORF249] [protein_id=NP_803815.1] [location=241472..242266]	100	99	98.106	99
>lcl|NC_004629.1_cds_NP_803816.1_250 [gene=PHIKZ250] [protein=ORF250] [protein_id=NP_803816.1] [location=242280..242663]	32.5	62	100	99
>lcl|NC_004629.1_cds_NP_803817.1_251 [gene=PHIKZ251] [protein=ORF251] [protein_id=NP_803817.1] [location=242681..243136]	100	99	100	99
>lcl|NC_004629.1_cds_NP_803818.1_252 [gene=PHIKZ252] [protein=ORF252] [protein_id=NP_803818.1] [location=243169..243546]	100	99	100	71
>lcl|NC_004629.1_cds_NP_803819.1_253 [gene=PHIKZ253] [protein=ORF253] [protein_id=NP_803819.1] [location=243536..243775]	100	99	100	78
>lcl|NC_004629.1_cds_NP_803820.1_254 [gene=PHIKZ254] [protein=ORF254] [protein_id=NP_803820.1] [location=244069..244443]	100	99	100	99
>lcl|NC_004629.1_cds_NP_803821.1_255 [gene=PHIKZ255] [protein=ORF255] [protein_id=NP_803821.1] [location=244424..244891]	100	98	100	97
>lcl|NC_004629.1_cds_NP_803822.1_256 [gene=PHIKZ256] [protein=ORF256] [protein_id=NP_803822.1] [location=244864..245094]	100	99	0	0
>lcl|NC_004629.1_cds_NP_803823.1_257 [gene=PHIKZ257] [protein=ORF257] [protein_id=NP_803823.1] [location=245091..245777]	28.07	48	100	99
>lcl|NC_004629.1_cds_NP_803824.1_258 [gene=PHIKZ258] [protein=ORF258] [protein_id=NP_803824.1] [location=245822..246196]	28.07	82	100	99
>lcl|NC_004629.1_cds_NP_803825.1_259 [gene=PHIKZ259] [protein=ORF259] [protein_id=NP_803825.1] [location=246199..246633]	100	99	100	99
>lcl|NC_004629.1_cds_NP_803826.1_260 [gene=PHIKZ260] [protein=ORF260] [protein_id=NP_803826.1] [location=246758..247117]	100	99	100	99
>lcl|NC_004629.1_cds_NP_803827.1_261 [gene=PHIKZ261] [protein=ORF261] [protein_id=NP_803827.1] [location=247512..247934]	100	99	84.058	98
>lcl|NC_004629.1_cds_NP_803828.1_262 [gene=PHIKZ262] [protein=ORF262] [protein_id=NP_803828.1] [location=247986..248219]	100	99	100	99
>lcl|NC_004629.1_cds_NP_803829.1_263 [gene=PHIKZ263] [protein=ORF263] [protein_id=NP_803829.1] [location=248247..248525]	100	99	96.739	99
>lcl|NC_004629.1_cds_NP_803830.1_264 [gene=PHIKZ264] [protein=ORF264] [protein_id=NP_803830.1] [location=248552..248971]	27.273	84	94.964	99
>lcl|NC_004629.1_cds_NP_803831.1_265 [gene=PHIKZ265] [protein=ORF265] [protein_id=NP_803831.1] [location=249050..249346]	34.444	91	97.959	99
>lcl|NC_004629.1_cds_NP_803832.1_266 [gene=PHIKZ266] [protein=ORF266] [protein_id=NP_803832.1] [location=249813..250244]	33.333	67	96.503	99
>lcl|NC_004629.1_cds_NP_803833.1_267 [gene=PHIKZ267] [protein=ORF267] [protein_id=NP_803833.1] [location=250307..250609]	46.875	94	93	99
>lcl|NC_004629.1_cds_NP_803834.1_268 [gene=PHIKZ268] [protein=ORF268] [protein_id=NP_803834.1] [location=250902..251204]	55.172	86	95.833	95
>lcl|NC_004629.1_cds_NP_803835.1_269 [gene=PHIKZ269] [protein=ORF269] [protein_id=NP_803835.1] [location=251213..251425]	100	99	98.571	99
>lcl|NC_004629.1_cds_NP_803836.1_270 [gene=PHIKZ270] [protein=ORF270] [protein_id=NP_803836.1] [location=251422..251799]	100	99	97.6	99
>lcl|NC_004629.1_cds_NP_803837.1_271 [gene=PHIKZ271] [protein=ORF271] [protein_id=NP_803837.1] [location=251801..252166]	100	99	81.818	99
>lcl|NC_004629.1_cds_NP_803838.1_272 [gene=PHIKZ272] [protein=ORF272] [protein_id=NP_803838.1] [location=252210..252545]	36.111	90	97.297	99
>lcl|NC_004629.1_cds_NP_803839.1_273 [gene=PHIKZ273] [protein=ORF273] [protein_id=NP_803839.1] [location=252592..253278]	27.461	82	89.474	99
>lcl|NC_004629.1_cds_NP_803840.1_274 [gene=PHIKZ274] [protein=ORF274] [protein_id=NP_803840.1] [location=253291..253530]	100	99	98.734	99
>lcl|NC_004629.1_cds_NP_803841.1_275 [gene=PHIKZ275] [protein=ORF275] [protein_id=NP_803841.1] [location=253527..253886]	100	99	91.597	99
>lcl|NC_004629.1_cds_NP_803842.1_276 [gene=PHIKZ276] [protein=ORF276] [protein_id=NP_803842.1] [location=253901..254422]	100	99	98.844	99
>lcl|NC_004629.1_cds_NP_803843.1_277 [gene=PHIKZ277] [protein=ORF277] [protein_id=NP_803843.1] [location=254434..254733]	100	99	98.99	99
>lcl|NC_004629.1_cds_NP_803844.1_278 [gene=PHIKZ278] [protein=ORF278] [protein_id=NP_803844.1] [location=254792..255232]	31.915	93	99.315	99
>lcl|NC_004629.1_cds_NP_803845.1_279 [gene=PHIKZ279] [protein=ORF279] [protein_id=NP_803845.1] [location=255225..255737]	100	99	100	99
>lcl|NC_004629.1_cds_NP_803846.1_280 [gene=PHIKZ280] [protein=ORF280] [protein_id=NP_803846.1] [location=255745..256110]	100	99	100	99
>lcl|NC_004629.1_cds_NP_803847.1_281 [gene=PHIKZ281] [protein=ORF281] [protein_id=NP_803847.1] [location=256151..256507]	100	99	100	99
>lcl|NC_004629.1_cds_NP_803848.1_282 [gene=PHIKZ282] [protein=ORF282] [protein_id=NP_803848.1] [location=256554..257069]	56.805	98	100	99
>lcl|NC_004629.1_cds_NP_803849.1_283 [gene=PHIKZ283] [protein=ORF283] [protein_id=NP_803849.1] [location=257085..257549]	100	99	99.351	99
>lcl|NC_004629.1_cds_NP_803850.1_284 [gene=PHIKZ284] [protein=ORF284] [protein_id=NP_803850.1] [location=258009..258845]	100	99	93.103	99
>lcl|NC_004629.1_cds_NP_803851.1_285 [gene=PHIKZ285] [protein=ORF285] [protein_id=NP_803851.1] [location=258903..259688]	60.536	99	95.019	99
>lcl|NC_004629.1_cds_NP_803852.1_286 [gene=PHIKZ286] [protein=ORF286] [protein_id=NP_803852.1] [location=259685..261211]	54.247	99	98.189	98
>lcl|NC_004629.1_cds_NP_803853.1_287 [gene=PHIKZ287] [protein=ORF287] [protein_id=NP_803853.1] [location=261572..262225]	40.991	97	99.539	99
>lcl|NC_004629.1_cds_NP_803854.1_288 [gene=PHIKZ288] [protein=ORF288] [protein_id=NP_803854.1] [location=262782..263162]	25	76	99.206	99
>lcl|NC_004629.1_cds_NP_803855.1_289 [gene=PHIKZ289] [protein=ORF289] [protein_id=NP_803855.1] [location=263329..264060]	100	99	98.765	99
>lcl|NC_004629.1_cds_NP_803856.1_290 [gene=PHIKZ290] [protein=ORF290] [protein_id=NP_803856.1] [location=264066..264581]	100	99	94.737	99
>lcl|NC_004629.1_cds_NP_803857.1_291 [gene=PHIKZ291] [protein=ORF291] [protein_id=NP_803857.1] [location=264750..265430]	100	99	92.478	99
>lcl|NC_004629.1_cds_NP_803858.1_292 [gene=PHIKZ292] [protein=ORF292] [protein_id=NP_803858.1] [location=complement(265492..265926)]	100	56	88.889	99
>lcl|NC_004629.1_cds_NP_803859.1_293 [gene=PHIKZ293] [protein=ORF293] [protein_id=NP_803859.1] [location=complement(265962..266372)]	100	99	94.853	99
>lcl|NC_004629.1_cds_NP_803860.1_294 [gene=PHIKZ294] [protein=ORF294] [protein_id=NP_803860.1] [location=complement(267140..267769)]	100	99	100	99
>lcl|NC_004629.1_cds_NP_803861.1_295 [gene=PHIKZ295] [protein=ORF295] [protein_id=NP_803861.1] [location=complement(268241..268531)]	100	99	100	99
>lcl|NC_004629.1_cds_NP_803862.1_296 [gene=PHIKZ296] [protein=ORF296] [protein_id=NP_803862.1] [location=complement(268916..269398)]	100	99	42.188	40
>lcl|NC_004629.1_cds_NP_803863.1_297 [gene=PHIKZ297] [protein=ORF297] [protein_id=NP_803863.1] [location=complement(269852..270364)]	31.852	77	99.412	99
>lcl|NC_004629.1_cds_NP_803864.1_298 [gene=PHIKZ298] [protein=ORF298] [protein_id=NP_803864.1] [location=complement(270649..271656)]	54.354	99	99.701	99
>lcl|NC_004629.1_cds_NP_803865.1_299 [gene=PHIKZ299] [protein=ORF299] [protein_id=NP_803865.1] [location=complement(271952..272299)]	100	99	100	99
>lcl|NC_004629.1_cds_NP_803866.1_300 [gene=PHIKZ300] [protein=ORF300] [protein_id=NP_803866.1] [location=complement(272598..272855)]	37.333	84	100	85
>lcl|NC_004629.1_cds_NP_803867.1_301 [gene=PHIKZ301] [protein=ORF301] [protein_id=NP_803867.1] [location=complement(272956..273249)]	100	99	100	99
>lcl|NC_004629.1_cds_NP_803868.1_302 [gene=PHIKZ302] [protein=ORF302] [protein_id=NP_803868.1] [location=complement(273499..273951)]	41.86	28	100	99
>lcl|NC_004629.1_cds_NP_803869.1_303 [gene=PHIKZ303] [protein=ORF303] [protein_id=NP_803869.1] [location=complement(274165..276105)]	30.973	17	77.21	78
>lcl|NC_004629.1_cds_NP_803870.1_304 [gene=PHIKZ304] [protein=ORF304] [protein_id=NP_803870.1] [location=complement(276191..276604)]	45.926	98	99.27	99
>lcl|NC_004629.1_cds_NP_803871.1_305 [gene=PHIKZ305] [protein=ORF305] [protein_id=NP_803871.1] [location=complement(276601..277764)]	65.312	95	100	95
>lcl|NC_004629.1_cds_NP_803872.1_306 [gene=PHIKZ306] [protein=ORF306] [protein_id=NP_803872.1] [location=complement(277865..280204)]	63.007	98	100	99
NC_005856
>lcl|NC_005856.1_cds_YP_006471.1_1 [gene=cra] [protein=Cra] [protein_id=YP_006471.1] [location=207..428]	95.89	99	0	0
>lcl|NC_005856.1_cds_YP_006472.1_2 [gene=cre] [protein=Cre] [protein_id=YP_006472.1] [location=436..1467]	41.304	93	100	99
>lcl|NC_005856.1_cds_YP_006473.1_3 [gene=c8] [protein=C8] [protein_id=YP_006473.1] [location=1518..1829]	90.291	99	0	0
>lcl|NC_005856.1_cds_YP_006474.1_4 [gene=ref] [protein=Ref] [protein_id=YP_006474.1] [location=2077..2637]	96.667	96	0	0
>lcl|NC_005856.1_cds_YP_006475.1_5 [gene=mat] [protein=Mat] [protein_id=YP_006475.1] [location=2716..3468]	95.775	85	0	0
>lcl|NC_005856.1_cds_YP_006476.1_6 [gene=res] [protein=Res] [protein_id=YP_006476.1] [location=complement(3544..6456)]	99.588	99	0	0
>lcl|NC_005856.1_cds_YP_006477.1_7 [gene=lxc] [protein=Lxc] [protein_id=YP_006477.1] [location=complement(9750..9998)]	98.78	99	0	0
>lcl|NC_005856.1_cds_YP_006478.1_8 [gene=ulx] [protein=Ulx] [protein_id=YP_006478.1] [location=complement(9995..10435)]	98.63	99	0	0
>lcl|NC_005856.1_cds_YP_006479.1_9 [gene=darB] [protein=DarB] [protein_id=YP_006479.1] [location=complement(10469..17236)]	99.802	22	29.319	8
>lcl|NC_005856.1_cds_YP_006480.1_10 [gene=prt] [protein=Prt] [protein_id=YP_006480.1] [location=17312..19021]	97.996	88	0	0
>lcl|NC_005856.1_cds_YP_006481.1_11 [gene=pro] [protein=Pro] [protein_id=YP_006481.1] [location=19014..20033]	100	92	0	0
>lcl|NC_005856.1_cds_YP_006482.1_12 [gene=lydE] [protein=LydE] [protein_id=YP_006482.1] [location=complement(20013..20228)]	100	49	0	0
>lcl|NC_005856.1_cds_YP_006483.1_13 [gene=lydD] [protein=LydD] [protein_id=YP_006483.1] [location=complement(20078..20332)]	98	59	0	0
>lcl|NC_005856.1_cds_YP_006484.1_14 [gene=lyz] [protein=Lyz] [protein_id=YP_006484.1] [location=complement(20325..20882)]	99.459	99	55.556	89
>lcl|NC_005856.1_cds_YP_006485.1_15 [gene=ssb] [protein=Ssb] [protein_id=YP_006485.1] [location=21051..21539]	96.026	93	75	73
>lcl|NC_005856.1_cds_YP_006486.1_16 [gene=isaA] [protein=IsaA] [protein_id=YP_006486.1] [location=21569..22531]	99.324	46	0	0
>lcl|NC_005856.1_cds_YP_006487.1_17 [gene=insB] [protein=InsB] [protein_id=YP_006487.1] [location=complement(22641..23144)]	100	15	45.455	85
>lcl|NC_005856.1_cds_YP_006488.1_18 [gene=insA] [protein=InsA] [protein_id=YP_006488.1] [location=complement(23063..23338)]	100	29	41.758	99
>lcl|NC_005856.1_cds_YP_006489.1_19 [gene=isaB] [protein=IsaB] [protein_id=YP_006489.1] [location=23527..24132]	100	99	0	0
>lcl|NC_005856.1_cds_YP_006490.1_20 [gene=hxr] [protein=Hxr] [protein_id=YP_006490.1] [location=complement(24244..24552)]	98.684	74	0	0
>lcl|NC_005856.1_cds_YP_006491.1_21 [gene=ddrB] [protein=DdrB] [protein_id=YP_006491.1] [location=complement(24542..27529)]	100	13	0	0
>lcl|NC_005856.1_cds_YP_006492.1_22 [gene=iddB] [protein=IddB] [protein_id=YP_006492.1] [location=26577..26975]	97.727	99	0	0
>lcl|NC_005856.1_cds_YP_006493.1_23 [gene=ddrA] [protein=DdrA] [protein_id=YP_006493.1] [location=complement(27542..27907)]	96.33	89	0	0
>lcl|NC_005856.1_cds_YP_006494.1_24 [gene=darA] [protein=DarA] [protein_id=YP_006494.1] [location=complement(27904..29823)]	97.34	99	0	0
>lcl|NC_005856.1_cds_YP_006495.1_25 [gene=hdf] [protein=Hdf] [protein_id=YP_006495.1] [location=complement(29825..30436)]	98.5	98	0	0
>lcl|NC_005856.1_cds_YP_006496.1_26 [gene=lydB] [protein=LydB] [protein_id=YP_006496.1] [location=complement(30414..30857)]	98.639	99	0	0
>lcl|NC_005856.1_cds_YP_006497.1_27 [gene=lydA] [protein=LydA] [protein_id=YP_006497.1] [location=complement(30854..31183)]	30.952	76	0	0
>lcl|NC_005856.1_cds_YP_006498.1_28 [gene=lydC] [protein=LydC] [protein_id=YP_006498.1] [location=complement(31251..31532)]	30.137	78	0	0
>lcl|NC_005856.1_cds_YP_006499.1_29 [gene=cin] [protein=Cin] [protein_id=YP_006499.1] [location=31660..32220]	42.969	67	77.957	99
>lcl|NC_005856.1_cds_YP_006500.1_30 [gene=U prime] [protein=gpU prime] [protein_id=YP_006500.1] [location=33785..34318]	96.386	47	95.48	99
>lcl|NC_005856.1_cds_YP_006501.1_31 [gene=U] [protein=gpU] [protein_id=YP_006501.1] [location=complement(34347..34874)]	39.759	46	96.571	99
>lcl|NC_005856.1_cds_YP_006502.1_32 [gene=S] [protein=gpS] [protein_id=YP_006502.1] [location=complement(34878..37841)]	100	19	90.294	34
>lcl|NC_005856.1_cds_YP_006503.1_33 [gene=R] [protein=gpR] [protein_id=YP_006503.1] [location=complement(37853..38287)]	89.394	46	0	0
>lcl|NC_005856.1_cds_YP_006504.1_34 [gene=16] [protein=gp16] [protein_id=YP_006504.1] [location=complement(38366..39202)]	100	41	0	0
>lcl|NC_005856.1_cds_YP_006505.1_35 [gene=bplA] [protein=BplA] [protein_id=YP_006505.1] [location=complement(39202..40635)]	80	18	23.203	61
>lcl|NC_005856.1_cds_YP_006506.1_36 [gene=pmgA] [protein=PmgA] [protein_id=YP_006506.1] [location=complement(40632..40988)]	98.305	99	0	0
>lcl|NC_005856.1_cds_YP_006507.1_37 [gene=sit] [protein=Sit] [protein_id=YP_006507.1] [location=complement(40988..44410)]	95.614	99	27.434	10
>lcl|NC_005856.1_cds_YP_006508.1_38 [gene=pmgB] [protein=PmgB] [protein_id=YP_006508.1] [location=complement(44492..45373)]	99.317	99	0	0
>lcl|NC_005856.1_cds_YP_006509.1_39 [gene=tub] [protein=Tub] [protein_id=YP_006509.1] [location=complement(45388..45999)]	98.936	92	0	0
>lcl|NC_005856.1_cds_YP_006510.1_40 [gene=pmgC] [protein=PmgC] [protein_id=YP_006510.1] [location=complement(46010..46576)]	97.34	99	0	0
>lcl|NC_005856.1_cds_YP_006511.1_41 [gene=simC] [protein=SimC] [protein_id=YP_006511.1] [location=complement(46786..47580)]	99.614	98	0	0
>lcl|NC_005856.1_cds_YP_006512.1_42 [gene=simB] [protein=SimB] [protein_id=YP_006512.1] [location=complement(47573..47908)]	100	73	0	0
>lcl|NC_005856.1_cds_YP_006513.1_43 [gene=simA] [protein=SimA] [protein_id=YP_006513.1] [location=complement(47912..48070)]	100	98	0	0
>lcl|NC_005856.1_cds_YP_006514.1_44 [gene=icd] [protein=Icd] [protein_id=YP_006514.1] [location=48470..48691]	95.89	99	0	0
>lcl|NC_005856.1_cds_YP_006515.1_45 [gene=ant1] [protein=Ant1] [protein_id=YP_006515.1] [location=48688..49731]	100	13	59.394	47
>lcl|NC_005856.1_cds_YP_006516.1_46 [gene=ant2] [protein=Ant2] [protein_id=YP_006516.1] [location=48937..49731]	50.98	76	59.394	62
>lcl|NC_005856.1_cds_YP_006517.1_47 [gene=kilA] [protein=KilA] [protein_id=YP_006517.1] [location=49896..50696]	49.444	64	67.692	49
>lcl|NC_005856.1_cds_YP_006518.1_48 [gene=repL] [protein=RepL] [protein_id=YP_006518.1] [location=50726..51571]	100	70	0	0
>lcl|NC_005856.1_cds_YP_006519.1_49 [gene=rlfA] [protein=RlfA] [protein_id=YP_006519.1] [location=51740..52444]	100	71	43.723	97
>lcl|NC_005856.1_cds_YP_006520.1_50 [gene=rlfB] [protein=RlfB] [protein_id=YP_006520.1] [location=52444..52908]	97.403	99	0	0
>lcl|NC_005856.1_cds_YP_006521.1_51 [gene=pmgF] [protein=PmgF] [protein_id=YP_006521.1] [location=complement(53074..53370)]	43.077	66	0	0
>lcl|NC_005856.1_cds_YP_006522.1_52 [gene=bplB] [protein=BplB] [protein_id=YP_006522.1] [location=complement(53454..53963)]	98.817	99	0	0
>lcl|NC_005856.1_cds_YP_006523.1_53 [gene=pmgG] [protein=PmgG] [protein_id=YP_006523.1] [location=complement(53975..54556)]	90.674	99	0	0
>lcl|NC_005856.1_cds_YP_006524.1_54 [gene=21] [protein=gp21] [protein_id=YP_006524.1] [location=complement(54592..55407)]	95.652	93	0	0
>lcl|NC_005856.1_cds_YP_006525.1_55 [gene=22] [protein=gp22] [protein_id=YP_006525.1] [location=complement(55417..57006)]	98.488	99	0	0
>lcl|NC_005856.1_cds_YP_006526.1_56 [gene=23] [protein=gp23] [protein_id=YP_006526.1] [location=complement(57067..58773)]	100	31	0	0
>lcl|NC_005856.1_cds_YP_006527.1_57 [gene=parB] [protein=ParB] [protein_id=YP_006527.1] [location=complement(58999..60000)]	42.857	89	36.471	50
>lcl|NC_005856.1_cds_YP_006528.1_58 [gene=parA] [protein=ParA] [protein_id=YP_006528.1] [location=complement(60017..61213)]	100	5	22.896	74
>lcl|NC_005856.1_cds_YP_006529.1_59 [gene=repA] [protein=RepA] [protein_id=YP_006529.1] [location=complement(61771..62631)]	40.809	91	0	0
>lcl|NC_005856.1_cds_YP_006530.1_60 [gene=upfA] [protein=UpfA] [protein_id=YP_006530.1] [location=complement(62950..63342)]	95.385	99	0	0
>lcl|NC_005856.1_cds_YP_006531.1_61 [gene=mlp] [protein=Mlp] [protein_id=YP_006531.1] [location=complement(63354..63686)]	100	39	0	0
>lcl|NC_005856.1_cds_YP_006532.1_62 [gene=ppfA] [protein=PpfA] [protein_id=YP_006532.1] [location=complement(63520..63942)]	100	39	0	0
>lcl|NC_005856.1_cds_YP_006533.1_63 [gene=upfB] [protein=UpfB] [protein_id=YP_006533.1] [location=complement(63982..64827)]	97.509	99	0	0
>lcl|NC_005856.1_cds_YP_006534.1_64 [gene=upfC] [protein=UpfC] [protein_id=YP_006534.1] [location=complement(64779..65063)]	87.5	17	37.5	89
>lcl|NC_005856.1_cds_YP_006535.1_65 [gene=uhr] [protein=Uhr] [protein_id=YP_006535.1] [location=65233..65517]	100	99	0	0
>lcl|NC_005856.1_cds_YP_006536.1_66 [gene=hrdC] [protein=HrdC] [protein_id=YP_006536.1] [location=65510..66415]	99.336	99	41.667	98
>lcl|NC_005856.1_cds_YP_006537.1_67 [gene=dmt] [protein=Dmt] [protein_id=YP_006537.1] [location=66412..68676]	90.099	54	64.463	32
>lcl|NC_005856.1_cds_YP_006538.1_68 [gene=plp] [protein=Plp] [protein_id=YP_006538.1] [location=complement(69472..69849)]	97.849	74	0	0
>lcl|NC_005856.1_cds_YP_006539.1_69 [gene=upl] [protein=Upl] [protein_id=YP_006539.1] [location=complement(69850..70041)]	100	98	0	0
>lcl|NC_005856.1_cds_YP_006540.1_70 [gene=tciA] [protein=TciA] [protein_id=YP_006540.1] [location=70233..70658]	30.556	99	60.741	95
>lcl|NC_005856.1_cds_YP_006541.1_71 [gene=tciB] [protein=TciB] [protein_id=YP_006541.1] [location=70658..70822]	83.333	98	0	0
>lcl|NC_005856.1_cds_YP_006542.1_72 [gene=tciC] [protein=TciC] [protein_id=YP_006542.1] [location=70822..70929]	100	97	0	0
>lcl|NC_005856.1_cds_YP_006543.1_73 [gene=ban] [protein=Ban] [protein_id=YP_006543.1] [location=71295..72659]	98.899	99	46.712	97
>lcl|NC_005856.1_cds_YP_006544.1_74 [gene=dbn] [protein=Dbn] [protein_id=YP_006544.1] [location=72659..73657]	98.258	86	0	0
>lcl|NC_005856.1_cds_YP_006545.1_75 [gene=5] [protein=gp5] [protein_id=YP_006545.1] [location=complement(73704..74336)]	99.048	99	23.182	95
>lcl|NC_005856.1_cds_YP_006546.1_76 [gene=6] [protein=gp6] [protein_id=YP_006546.1] [location=complement(74329..75345)]	98.817	99	0	0
>lcl|NC_005856.1_cds_YP_006547.1_77 [gene=24] [protein=gp24] [protein_id=YP_006547.1] [location=complement(75347..76132)]	98.467	99	0	0
>lcl|NC_005856.1_cds_YP_006548.1_78 [gene=7] [protein=gp7] [protein_id=YP_006548.1] [location=complement(76119..76847)]	99.174	99	0	0
>lcl|NC_005856.1_cds_YP_006549.1_79 [gene=25] [protein=gp25] [protein_id=YP_006549.1] [location=complement(76851..78068)]	98.765	99	0	0
>lcl|NC_005856.1_cds_YP_006550.1_80 [gene=26] [protein=gp26] [protein_id=YP_006550.1] [location=complement(78078..78455)]	98.4	99	0	0
>lcl|NC_005856.1_cds_YP_006551.1_81 [gene=pmgL] [protein=PmgL] [protein_id=YP_006551.1] [location=78602..78847]	98.571	85	0	0
>lcl|NC_005856.1_cds_YP_006552.1_82 [gene=pmgM] [protein=pmgM] [protein_id=YP_006552.1] [location=78850..79428]	97.396	99	37.168	58
>lcl|NC_005856.1_cds_YP_006553.1_83 [gene=pmgN] [protein=PmgN] [protein_id=YP_006553.1] [location=79495..79650]	100	37	0	0
>lcl|NC_005856.1_cds_YP_006554.1_84 [gene=pmgO] [protein=PmgO] [protein_id=YP_006554.1] [location=79592..80254]	100	8	32.979	81
>lcl|NC_005856.1_cds_YP_006555.1_85 [gene=pmgP] [protein=PmgP] [protein_id=YP_006555.1] [location=80152..80778]	96.97	16	0	0
>lcl|NC_005856.1_cds_YP_006556.1_86 [gene=ppp] [protein=Ppp] [protein_id=YP_006556.1] [location=80760..81452]	98.261	99	65.455	95
>lcl|NC_005856.1_cds_YP_006557.1_87 [gene=pmgQ] [protein=PmgQ] [protein_id=YP_006557.1] [location=81449..82150]	97.854	99	0	0
>lcl|NC_005856.1_cds_YP_006558.1_88 [gene=pmgR] [protein=PmgR] [protein_id=YP_006558.1] [location=82232..82450]	100	99	33.333	82
>lcl|NC_005856.1_cds_YP_006559.1_89 [gene=pmgS] [protein=PmgS] [protein_id=YP_006559.1] [location=82452..83714]	98.571	99	23.291	91
>lcl|NC_005856.1_cds_YP_006560.1_90 [gene=pap] [protein=Pap] [protein_id=YP_006560.1] [location=83787..84293]	95.833	99	40.397	89
>lcl|NC_005856.1_cds_YP_006561.1_91 [gene=pmgT] [protein=PmgT] [protein_id=YP_006561.1] [location=84488..85417]	92.453	17	43.265	74
>lcl|NC_005856.1_cds_YP_006562.1_92 [gene=pmgU] [protein=PmgU] [protein_id=YP_006562.1] [location=85222..85557]	85.938	57	55.882	30
>lcl|NC_005856.1_cds_YP_006563.1_93 [gene=pmgV] [protein=PmgV] [protein_id=YP_006563.1] [location=85554..85916]	95.833	99	0	0
>lcl|NC_005856.1_cds_YP_006564.1_94 [gene=upfM] [protein=UpfM] [protein_id=YP_006564.1] [location=86099..86212]	94.595	97	0	0
>lcl|NC_005856.1_cds_YP_006565.1_95 [gene=upfN] [protein=UpfN] [protein_id=YP_006565.1] [location=86228..86425]	95.455	67	0	0
>lcl|NC_005856.1_cds_YP_006566.1_96 [gene=upfO] [protein=UpfO] [protein_id=YP_006566.1] [location=86403..86543]	62.5	68	0	0
>lcl|NC_005856.1_cds_YP_006567.1_97 [gene=hot] [protein=Hot] [protein_id=YP_006567.1] [location=86567..86830]	91.566	94	78.481	90
>lcl|NC_005856.1_cds_YP_006568.1_98 [gene=lxr] [protein=Lxr] [protein_id=YP_006568.1] [location=complement(86837..87409)]	93.122	99	0	0
>lcl|NC_005856.1_cds_YP_006569.1_99 [gene=humD] [protein=HumD] [protein_id=YP_006569.1] [location=87584..87973]	96.899	99	69.767	99
>lcl|NC_005856.1_cds_YP_006570.1_100 [gene=phd] [protein=Phd] [protein_id=YP_006570.1] [location=88046..88267]	100	99	0	0
>lcl|NC_005856.1_cds_YP_006571.1_101 [gene=doc] [protein=Doc] [protein_id=YP_006571.1] [location=88267..88647]	99.206	99	27.642	94
>lcl|NC_005856.1_cds_YP_006572.1_102 [gene=pdcA] [protein=PdcA] [protein_id=YP_006572.1] [location=88631..88831]	95.455	99	0	0
>lcl|NC_005856.1_cds_YP_006573.1_103 [gene=pdcB] [protein=PdcB] [protein_id=YP_006573.1] [location=88859..89902]	100	7	26.163	98
>lcl|NC_005856.1_cds_YP_006574.1_104 [gene=lpa] [protein=Lpa] [protein_id=YP_006574.1] [location=89991..90443]	30.645	81	0	0
>lcl|NC_005856.1_cds_YP_006575.1_105 [gene=pacA] [protein=PacA] [protein_id=YP_006575.1] [location=90529..91722]	35.417	12	0	0
>lcl|NC_005856.1_cds_YP_006576.1_106 [gene=pacB] [protein=PacB] [protein_id=YP_006576.1] [location=91722..93206]	55.738	98	27.564	90
>lcl|NC_005856.1_cds_YP_006577.1_107 [gene=c1.100] [protein=C1.100] [protein_id=YP_006577.1] [location=complement(93231..94082)]	21.269	89	0	0
>lcl|NC_005856.1_cds_YP_006578.1_108 [gene=coi] [protein=Coi] [protein_id=YP_006578.1] [location=complement(94193..94402)]	100	43	0	0
>lcl|NC_005856.1_cds_YP_006579.1_109 [gene=imcB] [protein=ImcB] [protein_id=YP_006579.1] [location=complement(94368..94463)]	100	97	0	0
>lcl|NC_005856.1_cds_YP_006580.1_110 [gene=imcA] [protein=ImcA] [protein_id=YP_006580.1] [location=complement(94482..94595)]	97.297	97	0	0
NC_007021
>lcl|NC_007021.1_cds_YP_238535.1_1 [gene=TwortORF097] [protein=ORF097] [protein_id=YP_238535.1] [location=764..1165]	48.148	40	41	73
>lcl|NC_007021.1_cds_YP_238536.1_2 [gene=TwortORF036] [protein=ORF036] [protein_id=YP_238536.1] [location=1284..2144]	90	10	53.586	83
>lcl|NC_007021.1_cds_YP_238537.1_3 [gene=TwortORF039] [protein=ORF039] [protein_id=YP_238537.1] [location=2157..2948]	49.451	32	50.549	32
>lcl|NC_007021.1_cds_YP_238538.1_4 [gene=TwortORF057] [protein=ORF057] [protein_id=YP_238538.1] [location=2935..3570]	33.636	51	0	0
>lcl|NC_007021.1_cds_YP_238539.1_5 [gene=TwortORF029] [protein=ORF029] [protein_id=YP_238539.1] [location=3606..4577]	54.93	22	0	0
>lcl|NC_007021.1_cds_YP_238540.1_6 [gene=TwortORF205] [protein=hypothetical protein] [protein_id=YP_238540.1] [location=4663..5019]	53.846	44	0	0
>lcl|NC_007021.1_cds_YP_238541.1_7 [gene=TwortORF121] [protein=ORF121] [protein_id=YP_238541.1] [location=5028..5408]	51.282	31	0	0
>lcl|NC_007021.1_cds_YP_238542.1_8 [gene=TwortORF012] [protein=ORF012] [protein_id=YP_238542.1] [location=5389..7119]	40	21	26.774	53
>lcl|NC_007021.1_cds_YP_238543.1_9 [gene=TwortORF040] [protein=ORF040] [protein_id=YP_238543.1] [location=7268..8053]	51.163	16	28.019	72
>lcl|NC_007021.1_cds_YP_238544.1_10 [gene=TwortORF028] [protein=ORF028] [protein_id=YP_238544.1] [location=8059..9054]	30.645	53	0	0
>lcl|NC_007021.1_cds_YP_238545.1_11 [gene=TwortORF016] [protein=ORF016] [protein_id=YP_238545.1] [location=9146..10534]	52.632	8	65.217	74
>lcl|NC_007021.1_cds_YP_238546.1_12 [gene=TwortORF286] [protein=ORF286] [protein_id=YP_238546.1] [location=10485..10619]	100	33	0	0
>lcl|NC_007021.1_cds_YP_238547.1_13 [gene=TwortORF138] [protein=ORF138] [protein_id=YP_238547.1] [location=10621..10890]	43.478	50	0	0
>lcl|NC_007021.1_cds_YP_238548.1_14 [gene=TwortORF032] [protein=ORF032] [protein_id=YP_238548.1] [location=10902..11813]	31.474	82	0	0
>lcl|NC_007021.1_cds_YP_238549.1_15 [gene=TwortORF034] [protein=ORF034] [protein_id=YP_238549.1] [location=11825..12712]	29.101	59	0	0
>lcl|NC_007021.1_cds_YP_238550.1_16 [gene=TwortORF055] [protein=ORF055] [protein_id=YP_238550.1] [location=12712..13356]	26.5	87	0	0
>lcl|NC_007021.1_cds_YP_238551.1_17 [gene=TwortORF037] [protein=ORF037] [protein_id=YP_238551.1] [location=13387..14214]	25.214	77	0	0
>lcl|NC_007021.1_cds_YP_238552.1_18 [gene=TwortORF185] [protein=ORF185] [protein_id=YP_238552.1] [location=14204..14413]	54	71	0	0
>lcl|NC_007021.1_cds_YP_238553.1_19 [gene=TwortORF011] [protein=ORF011] [protein_id=YP_238553.1] [location=14434..16197]	100	11	0	0
>lcl|NC_007021.1_cds_YP_238554.1_20 [gene=TwortORF203] [protein=ORF203] [protein_id=YP_238554.1] [location=complement(15456..15647)]	34.545	86	0	0
>lcl|NC_007021.1_cds_YP_238555.1_21 [gene=TwortORF106] [protein=ORF106] [protein_id=YP_238555.1] [location=16272..16637]	47.826	94	0	0
>lcl|NC_007021.1_cds_YP_238556.1_22 [gene=TwortORF018] [protein=ORF018] [protein_id=YP_238556.1] [location=17654..18967]	34.043	21	34.746	26
>lcl|NC_007021.1_cds_YP_238557.1_23 [gene=TwortORF172] [protein=ORF172] [protein_id=YP_238557.1] [location=complement(18142..18363)]	32	91	0	0
>lcl|NC_007021.1_cds_YP_238558.1_24 [gene=TwortORF245] [protein=ORF245] [protein_id=YP_238558.1] [location=19026..19184]	100	32	0	0
>lcl|NC_007021.1_cds_YP_238559.1_25 [gene=TwortORF219] [protein=ORF219] [protein_id=YP_238559.1] [location=19132..19311]	83.333	30	0	0
>lcl|NC_007021.1_cds_YP_238560.1_26 [gene=TwortORF083] [protein=hypothetical protein] [protein_id=YP_238560.1] [location=19347..19802]	42.568	95	0	0
>lcl|NC_007021.1_cds_YP_238561.1_27 [gene=TwortORF125] [protein=hypothetical protein] [protein_id=YP_238561.1] [location=19849..20154]	44.118	67	0	0
>lcl|NC_007021.1_cds_YP_238562.1_28 [gene=TwortORF229] [protein=ORF229] [protein_id=YP_238562.1] [location=20237..20689]	36.792	70	0	0
>lcl|NC_007021.1_cds_YP_238563.1_29 [gene=TwortORF081] [protein=ORF081] [protein_id=YP_238563.1] [location=20763..21221]	38.889	43	0	0
>lcl|NC_007021.1_cds_YP_238564.1_30 [gene=TwortORF002] [protein=ORF002] [protein_id=YP_238564.1] [location=21272..25081]	76.19	3	42.623	9
>lcl|NC_007021.1_cds_YP_238565.1_31 [gene=TwortORF087] [protein=ORF087] [protein_id=YP_238565.1] [location=complement(24748..25182)]	94.444	12	0	0
>lcl|NC_007021.1_cds_YP_238566.1_32 [gene=TwortORF007] [protein=ORF007] [protein_id=YP_238566.1] [location=25129..27543]	100	4	42.629	31
>lcl|NC_007021.1_cds_YP_238567.1_33 [gene=TwortORF319] [protein=ORF319] [protein_id=YP_238567.1] [location=27431..27550]	44.118	85	0	0
>lcl|NC_007021.1_cds_YP_238568.1_34 [gene=TwortORF035] [protein=ORF035] [protein_id=YP_238568.1] [location=27547..28413]	32.129	84	0	0
>lcl|NC_007021.1_cds_YP_238569.1_35 [gene=TwortORF010] [protein=ORF010] [protein_id=YP_238569.1] [location=28410..30224]	100	8	37.391	19
>lcl|NC_007021.1_cds_YP_238570.1_36 [gene=TwortORF277] [protein=ORF277] [protein_id=YP_238570.1] [location=28975..29115]	43.478	98	0	0
>lcl|NC_007021.1_cds_YP_238571.1_37 [gene=TwortORF041] [protein=ORF041] [protein_id=YP_238571.1] [location=30314..31093]	29.508	23	0	0
>lcl|NC_007021.1_cds_YP_238572.1_38 [gene=TwortORF072] [protein=ORF072] [protein_id=YP_238572.1] [location=31090..31623]	48.333	34	0	0
>lcl|NC_007021.1_cds_YP_238573.1_39 [gene=TwortORF050] [protein=ORF050] [protein_id=YP_238573.1] [location=31613..32317]	28.272	81	0	0
>lcl|NC_007021.1_cds_YP_238574.1_40 [gene=TwortORF026] [protein=ORF026] [protein_id=YP_238574.1] [location=32331..33377]	100	6	24.367	83
>lcl|NC_007021.1_cds_YP_238575.1_41 [gene=TwortORF381] [protein=ORF381] [protein_id=YP_238575.1] [location=complement(33308..33418)]	100	59	0	0
>lcl|NC_007021.1_cds_YP_238576.1_42 [gene=TwortORF005] [protein=ORF005] [protein_id=YP_238576.1] [location=33388..36519]	35.915	14	0	0
>lcl|NC_007021.1_cds_YP_238577.1_43 [gene=TwortORF073] [protein=ORF073] [protein_id=YP_238577.1] [location=36604..37113]	62.222	26	0	0
>lcl|NC_007021.1_cds_YP_238578.1_44 [gene=TwortORF003] [protein=ORF003] [protein_id=YP_238578.1] [location=37130..40585]	30.954	93	28.846	43
>lcl|NC_007021.1_cds_YP_238579.1_45 [gene=TwortORF232] [protein=ORF232] [protein_id=YP_238579.1] [location=40636..40803]	64.286	50	0	0
>lcl|NC_007021.1_cds_YP_238580.1_46 [gene=TwortORF024] [protein=ORF024] [protein_id=YP_238580.1] [location=40803..41852]	22.293	42	0	0
>lcl|NC_007021.1_cds_YP_238581.1_47 [gene=TwortORF107] [protein=ORF107] [protein_id=YP_238581.1] [location=41868..42233]	32.143	92	0	0
>lcl|NC_007021.1_cds_YP_238582.1_48 [gene=TwortORF017] [protein=hypothetical protein] [protein_id=YP_238582.1] [location=42242..43570]	34.13	99	0	0
>lcl|NC_007021.1_cds_YP_238583.1_49 [gene=TwortORF006] [protein=ORF006] [protein_id=YP_238583.1] [location=43659..46673]	24.044	32	31.25	30
>lcl|NC_007021.1_cds_YP_238584.1_50 [gene=TwortORF013] [protein=ORF013] [protein_id=YP_238584.1] [location=46679..48166]	22.8	49	0	0
>lcl|NC_007021.1_cds_YP_238585.1_51 [gene=TwortORF014] [protein=ORF014] [protein_id=YP_238585.1] [location=48153..49595]	25.806	51	26.104	51
>lcl|NC_007021.1_cds_YP_238586.1_52 [gene=TwortORF027] [protein=ORF027] [protein_id=YP_238586.1] [location=49656..50675]	100	10	27.273	72
>lcl|NC_007021.1_cds_YP_238587.1_53 [gene=TwortORF401] [protein=ORF401] [protein_id=YP_238587.1] [location=complement(49703..49807)]	58.824	97	0	0
>lcl|NC_007021.1_cds_YP_238588.1_54 [gene=TwortORF109] [protein=hypothetical protein] [protein_id=YP_238588.1] [location=50732..51094]	34.615	64	0	0
>lcl|NC_007021.1_cds_YP_238589.1_55 [gene=TwortORF009] [protein=ORF009] [protein_id=YP_238589.1] [location=51098..53008]	57.759	18	37.736	25
>lcl|NC_007021.1_cds_YP_238590.1_56 [gene=TwortORF065] [protein=ORF065] [protein_id=YP_238590.1] [location=53011..53598]	30.928	47	0	0
>lcl|NC_007021.1_cds_YP_238591.1_57 [gene=TwortORF023] [protein=ORF023] [protein_id=YP_238591.1] [location=53611..54672]	61.194	19	0	0
>lcl|NC_007021.1_cds_YP_238592.1_58 [gene=TwortORF310] [protein=ORF310] [protein_id=YP_238592.1] [location=54913..55035]	100	98	0	0
>lcl|NC_007021.1_cds_YP_238593.1_59 [gene=TwortORF089] [protein=hypothetical protein] [protein_id=YP_238593.1] [location=55035..55466]	47.619	71	0	0
>lcl|NC_007021.1_cds_YP_238594.1_60 [gene=TwortORF063] [protein=ORF063] [protein_id=YP_238594.1] [location=55456..56055]	68.421	19	28.358	65
>lcl|NC_007021.1_cds_YP_238595.1_61 [gene=TwortORF099] [protein=ORF099] [protein_id=YP_238595.1] [location=56071..56463]	36.364	64	36.842	86
>lcl|NC_007021.1_cds_YP_238596.1_62 [gene=TwortORF045] [protein=ORF045] [protein_id=YP_238596.1] [location=56474..57217]	46.154	16	49.789	96
>lcl|NC_007021.1_cds_YP_238597.1_63 [gene=TwortORF033] [protein=ORF033] [protein_id=YP_238597.1] [location=57767..58669]	33.333	31	39.116	98
>lcl|NC_007021.1_cds_YP_238598.1_64 [gene=TwortORF052] [protein=ORF052] [protein_id=YP_238598.1] [location=58841..59572]	32.203	40	33.333	89
>lcl|NC_007021.1_cds_YP_238599.1_65 [gene=TwortORF371] [protein=ORF371] [protein_id=YP_238599.1] [location=59547..59657]	100	97	0	0
>lcl|NC_007021.1_cds_YP_238600.1_66 [gene=TwortORF118] [protein=ORF118] [protein_id=YP_238600.1] [location=59778..60104]	34.568	72	40.741	99
>lcl|NC_007021.1_cds_YP_238601.1_67 [gene=TwortORF025] [protein=ORF025] [protein_id=YP_238601.1] [location=60120..61169]	46.032	17	50.649	88
>lcl|NC_007021.1_cds_YP_238602.1_68 [gene=TwortORF252] [protein=ORF252] [protein_id=YP_238602.1] [location=complement(61079..61234)]	100	33	0	0
>lcl|NC_007021.1_cds_YP_238603.1_69 [gene=TwortORF139] [protein=ORF139] [protein_id=YP_238603.1] [location=61182..61451]	100	99	0	0
>lcl|NC_007021.1_cds_YP_238604.1_70 [gene=TwortORF123] [protein=thioredoxin-like protein] [protein_id=YP_238604.1] [location=61453..61761]	63.095	78	0	0
>lcl|NC_007021.1_cds_YP_238605.1_71 [gene=TwortORF064] [protein=ORF064] [protein_id=YP_238605.1] [location=61841..62563]	27.632	91	0	0
>lcl|NC_007021.1_cds_YP_238606.1_72 [gene=TwortORF129] [protein=ORF129] [protein_id=YP_238606.1] [location=62563..62859]	30.952	85	0	0
>lcl|NC_007021.1_cds_YP_238607.1_73 [gene=TwortORF110] [protein=ORF110] [protein_id=YP_238607.1] [location=62939..63250]	100	99	0	0
>lcl|NC_007021.1_cds_YP_238608.1_74 [gene=TwortORF004] [protein=ORF004] [protein_id=YP_238608.1] [location=63253..66456]	64.706	3	45.545	18
>lcl|NC_007021.1_cds_YP_238609.1_75 [gene=TwortORF186] [protein=ORF186] [protein_id=YP_238609.1] [location=66506..66709]	100	99	0	0
>lcl|NC_007021.1_cds_YP_238610.1_76 [gene=TwortORF077] [protein=ORF077] [protein_id=YP_238610.1] [location=66694..67176]	29.577	88	0	0
>lcl|NC_007021.1_cds_YP_238611.1_77 [gene=TwortORF022] [protein=ORF022] [protein_id=YP_238611.1] [location=67248..68342]	26.05	63	0	0
>lcl|NC_007021.1_cds_YP_238612.1_78 [gene=TwortORF155] [protein=ORF155] [protein_id=YP_238612.1] [location=68485..68730]	98.765	99	0	0
>lcl|NC_007021.1_cds_YP_238613.1_79 [gene=TwortORF019] [protein=ORF019] [protein_id=YP_238613.1] [location=68745..69968]	84.091	11	28.571	68
>lcl|NC_007021.1_cds_YP_238614.1_80 [gene=TwortORF112] [protein=ORF112] [protein_id=YP_238614.1] [location=69961..70308]	34.066	78	0	0
>lcl|NC_007021.1_cds_YP_238615.1_81 [gene=TwortORF058] [protein=ORF058] [protein_id=YP_238615.1] [location=70301..70936]	44.068	28	0	0
>lcl|NC_007021.1_cds_YP_238616.1_82 [gene=TwortORF407] [protein=ORF407] [protein_id=YP_238616.1] [location=70924..71025]	0	0	0	0
>lcl|NC_007021.1_cds_YP_238617.1_83 [gene=TwortORF056] [protein=hypothetical protein] [protein_id=YP_238617.1] [location=71007..71645]	29.452	62	0	0
>lcl|NC_007021.1_cds_YP_238618.1_84 [gene=TwortORF178] [protein=ORF178] [protein_id=YP_238618.1] [location=72199..72414]	57.576	46	42.254	99
>lcl|NC_007021.1_cds_YP_238619.1_85 [gene=TwortORF131] [protein=ORF131] [protein_id=YP_238619.1] [location=72515..72757]	65.625	74	0	0
>lcl|NC_007021.1_cds_YP_238620.1_86 [gene=TwortORF047] [protein=hypothetical protein] [protein_id=YP_238620.1] [location=72757..73491]	36.957	87	0	0
>lcl|NC_007021.1_cds_YP_238621.1_87 [gene=TwortORF020] [protein=ORF020] [protein_id=YP_238621.1] [location=73484..74719]	24.819	97	24.074	74
>lcl|NC_007021.1_cds_YP_238622.1_88 [gene=TwortORF105] [protein=ORF105] [protein_id=YP_238622.1] [location=74729..75094]	25.806	75	0	0
>lcl|NC_007021.1_cds_YP_238623.1_89 [gene=TwortORF071] [protein=ORF071] [protein_id=YP_238623.1] [location=75147..75683]	27.607	84	0	0
>lcl|NC_007021.1_cds_YP_238624.1_90 [gene=TwortORF043] [protein=ORF043] [protein_id=YP_238624.1] [location=75676..76422]	35.115	52	28.205	47
>lcl|NC_007021.1_cds_YP_238625.1_91 [gene=TwortORF093] [protein=ORF093] [protein_id=YP_238625.1] [location=76406..76825]	63.636	24	0	0
>lcl|NC_007021.1_cds_YP_238626.1_92 [gene=TwortORF038] [protein=ORF038] [protein_id=YP_238626.1] [location=76827..77633]	21.739	71	0	0
>lcl|NC_007021.1_cds_YP_238627.1_93 [gene=TwortORF048] [protein=ORF048] [protein_id=YP_238627.1] [location=77972..78700]	30.178	69	0	0
>lcl|NC_007021.1_cds_YP_238628.1_94 [gene=TwortORF079] [protein=ORF079] [protein_id=YP_238628.1] [location=78716..79180]	30.275	68	0	0
>lcl|NC_007021.1_cds_YP_238629.1_95 [gene=TwortORF088] [protein=ORF088] [protein_id=YP_238629.1] [location=79238..79669]	27.451	70	0	0
>lcl|NC_007021.1_cds_YP_238630.1_96 [gene=TwortORF054] [protein=hypothetical protein] [protein_id=YP_238630.1] [location=79679..80353]	34.184	85	0	0
>lcl|NC_007021.1_cds_YP_238631.1_97 [gene=TwortORF366] [protein=ORF366] [protein_id=YP_238631.1] [location=complement(80299..80412)]	100	45	0	0
>lcl|NC_007021.1_cds_YP_238632.1_98 [gene=TwortORF096] [protein=hypothetical protein] [protein_id=YP_238632.1] [location=80346..80741]	100	17	0	0
>lcl|NC_007021.1_cds_YP_238633.1_99 [gene=TwortORF157] [protein=ORF157] [protein_id=YP_238633.1] [location=80877..81116]	100	99	0	0
>lcl|NC_007021.1_cds_YP_238634.1_100 [gene=TwortORF168] [protein=ORF168] [protein_id=YP_238634.1] [location=81116..81340]	100	29	0	0
>lcl|NC_007021.1_cds_YP_238635.1_101 [gene=TwortORF237] [protein=ORF237] [protein_id=YP_238635.1] [location=81337..81501]	50.909	89	0	0
>lcl|NC_007021.1_cds_YP_238636.1_102 [gene=TwortORF190] [protein=ORF190] [protein_id=YP_238636.1] [location=81498..81704]	100	99	0	0
>lcl|NC_007021.1_cds_YP_238637.1_103 [gene=TwortORF021] [protein=ORF021] [protein_id=YP_238637.1] [location=81885..82994]	36.634	81	65.041	99
>lcl|NC_007021.1_cds_YP_238638.1_104 [gene=TwortORF132] [protein=ORF132] [protein_id=YP_238638.1] [location=83366..83644]	100	99	0	0
>lcl|NC_007021.1_cds_YP_238639.1_105 [gene=TwortORF067] [protein=ORF067] [protein_id=YP_238639.1] [location=83723..84286]	100	99	0	0
>lcl|NC_007021.1_cds_YP_238640.1_106 [gene=TwortORF111] [protein=ORF111] [protein_id=YP_238640.1] [location=84303..84659]	100	99	0	0
>lcl|NC_007021.1_cds_YP_238641.1_107 [gene=TwortORF195] [protein=ORF195] [protein_id=YP_238641.1] [location=84673..84873]	100	99	0	0
>lcl|NC_007021.1_cds_YP_238642.1_108 [gene=TwortORF084] [protein=ORF084] [protein_id=YP_238642.1] [location=84887..85339]	100	99	0	0
>lcl|NC_007021.1_cds_YP_238643.1_109 [gene=TwortORF102] [protein=ORF102] [protein_id=YP_238643.1] [location=85420..85794]	100	99	0	0
>lcl|NC_007021.1_cds_YP_238644.1_110 [gene=TwortORF130] [protein=ORF130] [protein_id=YP_238644.1] [location=85776..86069]	100	99	0	0
>lcl|NC_007021.1_cds_YP_238645.1_111 [gene=TwortORF082] [protein=ORF082] [protein_id=YP_238645.1] [location=86438..86893]	100	99	0	0
>lcl|NC_007021.1_cds_YP_238646.1_112 [gene=TwortORF174] [protein=ORF174] [protein_id=YP_238646.1] [location=86883..87095]	100	99	0	0
>lcl|NC_007021.1_cds_YP_238647.1_113 [gene=TwortORF117] [protein=ORF117] [protein_id=YP_238647.1] [location=87158..87490]	100	99	0	0
>lcl|NC_007021.1_cds_YP_238648.1_114 [gene=TwortORF170] [protein=ORF170] [protein_id=YP_238648.1] [location=88236..88508]	98.889	99	0	0
>lcl|NC_007021.1_cds_YP_238649.1_115 [gene=TwortORF044] [protein=ORF044] [protein_id=YP_238649.1] [location=88523..89269]	27.66	38	22.917	77
>lcl|NC_007021.1_cds_YP_238650.1_116 [gene=TwortORF095] [protein=ORF095] [protein_id=YP_238650.1] [location=89367..89774]	33.813	99	0	0
>lcl|NC_007021.1_cds_YP_238651.1_117 [gene=TwortORF075] [protein=ORF075] [protein_id=YP_238651.1] [location=90005..90502]	100	99	0	0
>lcl|NC_007021.1_cds_YP_238652.1_118 [gene=TwortORF162] [protein=ORF162] [protein_id=YP_238652.1] [location=90560..90793]	100	99	0	0
>lcl|NC_007021.1_cds_YP_238653.1_119 [gene=TwortORF127] [protein=ORF127] [protein_id=YP_238653.1] [location=90817..91119]	41.379	83	0	0
>lcl|NC_007021.1_cds_YP_238654.1_120 [gene=TwortORF114] [protein=ORF114] [protein_id=YP_238654.1] [location=91387..91731]	100	99	0	0
>lcl|NC_007021.1_cds_YP_238655.1_121 [gene=TwortORF227] [protein=ORF227] [protein_id=YP_238655.1] [location=91768..91941]	100	59	0	0
>lcl|NC_007021.1_cds_YP_238656.1_122 [gene=TwortORF200] [protein=ORF200] [protein_id=YP_238656.1] [location=91938..92126]	100	60	0	0
>lcl|NC_007021.1_cds_YP_238657.1_123 [gene=TwortORF179] [protein=ORF179] [protein_id=YP_238657.1] [location=92137..92352]	44.643	78	0	0
>lcl|NC_007021.1_cds_YP_238658.1_124 [gene=TwortORF175] [protein=ORF175] [protein_id=YP_238658.1] [location=92349..92567]	100	99	0	0
>lcl|NC_007021.1_cds_YP_238659.1_125 [gene=TwortORF206] [protein=ORF206] [protein_id=YP_238659.1] [location=92579..92767]	100	76	0	0
>lcl|NC_007021.1_cds_YP_238660.1_126 [gene=TwortORF030] [protein=ORF030] [protein_id=YP_238660.1] [location=92964..93914]	100	99	0	0
>lcl|NC_007021.1_cds_YP_238661.1_127 [gene=TwortORF137] [protein=ORF137] [protein_id=YP_238661.1] [location=94575..94847]	44.872	86	52.564	86
>lcl|NC_007021.1_cds_YP_238662.1_128 [gene=TwortORF197] [protein=ORF197] [protein_id=YP_238662.1] [location=95037..95234]	100	98	0	0
>lcl|NC_007021.1_cds_YP_238663.1_129 [gene=TwortORF094] [protein=ORF094] [protein_id=YP_238663.1] [location=95378..95794]	40.367	78	0	0
>lcl|NC_007021.1_cds_YP_238664.1_130 [gene=TwortORF113] [protein=ORF113] [protein_id=YP_238664.1] [location=complement(96020..96373)]	33.333	49	0	0
>lcl|NC_007021.1_cds_YP_238665.1_131 [gene=TwortORF408] [protein=ORF408] [protein_id=YP_238665.1] [location=96577..96678]	96.97	97	0	0
>lcl|NC_007021.1_cds_YP_238666.1_132 [gene=TwortORF192] [protein=ORF192] [protein_id=YP_238666.1] [location=96697..96900]	100	99	0	0
>lcl|NC_007021.1_cds_YP_238667.1_133 [gene=TwortORF253] [protein=ORF253] [protein_id=YP_238667.1] [location=96902..97054]	45	78	0	0
>lcl|NC_007021.1_cds_YP_238668.1_134 [gene=TwortORF173] [protein=ORF173] [protein_id=YP_238668.1] [location=97072..97260]	100	98	0	0
>lcl|NC_007021.1_cds_YP_238669.1_135 [gene=TwortORF062] [protein=ORF062] [protein_id=YP_238669.1] [location=complement(97830..98432)]	50	19	0	0
>lcl|NC_007021.1_cds_YP_238670.1_136 [gene=TwortORF148] [protein=ORF148] [protein_id=YP_238670.1] [location=complement(98492..98746)]	100	99	0	0
>lcl|NC_007021.1_cds_YP_238671.1_137 [gene=TwortORF171] [protein=ORF171] [protein_id=YP_238671.1] [location=complement(98828..99049)]	45.57	99	0	0
>lcl|NC_007021.1_cds_YP_238672.1_138 [gene=TwortORF104] [protein=ORF104] [protein_id=YP_238672.1] [location=complement(99060..99431)]	100	99	0	0
>lcl|NC_007021.1_cds_YP_238673.1_139 [gene=TwortORF008] [protein=ORF008] [protein_id=YP_238673.1] [location=complement(99421..101685)]	31.169	10	24.275	36
>lcl|NC_007021.1_cds_YP_238674.1_140 [gene=TwortORF126] [protein=ORF126] [protein_id=YP_238674.1] [location=complement(101687..101992)]	53.333	44	0	0
>lcl|NC_007021.1_cds_YP_238675.1_141 [gene=TwortORF146] [protein=ORF146] [protein_id=YP_238675.1] [location=complement(101992..102249)]	46.154	45	68.235	99
>lcl|NC_007021.1_cds_YP_238676.1_142 [gene=TwortORF049] [protein=putative protein phosphatase] [protein_id=YP_238676.1] [location=complement(102246..102953)]	38.462	32	56.596	98
>lcl|NC_007021.1_cds_YP_238677.1_143 [gene=TwortORF217] [protein=ORF217] [protein_id=YP_238677.1] [location=complement(103077..103259)]	100	98	0	0
>lcl|NC_007021.1_cds_YP_238678.1_144 [gene=TwortORF068] [protein=hypothetical protein] [protein_id=YP_238678.1] [location=complement(103267..103824)]	33.117	82	0	0
>lcl|NC_007021.1_cds_YP_238679.1_145 [gene=TwortORF101] [protein=ORF101] [protein_id=YP_238679.1] [location=complement(103887..104270)]	33.607	93	68.852	95
>lcl|NC_007021.1_cds_YP_238680.1_146 [gene=TwortORF086] [protein=ORF086] [protein_id=YP_238680.1] [location=complement(104280..104720)]	100	99	0	0
>lcl|NC_007021.1_cds_YP_238681.1_147 [gene=TwortORF053] [protein=ORF053] [protein_id=YP_238681.1] [location=complement(104729..105412)]	100	99	0	0
>lcl|NC_007021.1_cds_YP_238682.1_148 [gene=TwortORF166] [protein=ORF166] [protein_id=YP_238682.1] [location=complement(105505..105711)]	98.529	99	0	0
>lcl|NC_007021.1_cds_YP_238683.1_149 [gene=TwortORF159] [protein=ORF159] [protein_id=YP_238683.1] [location=complement(105719..105955)]	32.53	99	0	0
>lcl|NC_007021.1_cds_YP_238684.1_150 [gene=TwortORF085] [protein=ORF085] [protein_id=YP_238684.1] [location=complement(105952..106320)]	31.496	92	44.186	97
>lcl|NC_007021.1_cds_YP_238685.1_151 [gene=TwortORF076] [protein=ORF076] [protein_id=YP_238685.1] [location=complement(106317..106814)]	33.333	48	40	84
>lcl|NC_007021.1_cds_YP_238686.1_152 [gene=TwortORF152] [protein=ORF152] [protein_id=YP_238686.1] [location=complement(106727..106975)]	33.929	65	45	70
>lcl|NC_007021.1_cds_YP_238687.1_153 [gene=TwortORF404] [protein=ORF404] [protein_id=YP_238687.1] [location=complement(107152..107256)]	97.059	97	0	0
>lcl|NC_007021.1_cds_YP_238688.1_154 [gene=TwortORF103] [protein=ORF103] [protein_id=YP_238688.1] [location=complement(107765..108139)]	59.322	94	60.345	93
>lcl|NC_007021.1_cds_YP_238689.1_155 [gene=TwortORF124] [protein=ORF124] [protein_id=YP_238689.1] [location=complement(108180..108488)]	35.78	99	0	0
>lcl|NC_007021.1_cds_YP_238690.1_156 [gene=TwortORF001] [protein=ORF001] [protein_id=YP_238690.1] [location=complement(108565..112707)]	33.898	4	53.968	5
>lcl|NC_007021.1_cds_YP_238691.1_157 [gene=TwortORF300] [protein=ORF300] [protein_id=YP_238691.1] [location=complement(108753..108881)]	64.286	98	43.59	91
>lcl|NC_007021.1_cds_YP_238692.1_158 [gene=TwortORF080] [protein=hypothetical protein] [protein_id=YP_238692.1] [location=complement(112708..113172)]	44.186	82	0	0
>lcl|NC_007021.1_cds_YP_238693.1_159 [gene=TwortORF326] [protein=ORF326] [protein_id=YP_238693.1] [location=complement(113241..113360)]	100	98	0	0
>lcl|NC_007021.1_cds_YP_238694.1_160 [gene=TwortORF120] [protein=ORF120] [protein_id=YP_238694.1] [location=complement(113353..113667)]	24.638	64	0	0
>lcl|NC_007021.1_cds_YP_238695.1_161 [gene=TwortORF098] [protein=ORF098] [protein_id=YP_238695.1] [location=complement(113660..114061)]	46.154	57	0	0
>lcl|NC_007021.1_cds_YP_238696.1_162 [gene=TwortORF091] [protein=ORF091] [protein_id=YP_238696.1] [location=complement(114212..114637)]	100	99	56.618	96
>lcl|NC_007021.1_cds_YP_238697.1_163 [gene=TwortORF236] [protein=ORF236] [protein_id=YP_238697.1] [location=complement(114647..114814)]	100	98	0	0
>lcl|NC_007021.1_cds_YP_238698.1_164 [gene=TwortORF191] [protein=ORF191] [protein_id=YP_238698.1] [location=complement(114814..114957)]	100	98	0	0
>lcl|NC_007021.1_cds_YP_238699.1_165 [gene=TwortORF150] [protein=ORF150] [protein_id=YP_238699.1] [location=complement(115004..115255)]	37.975	90	0	0
>lcl|NC_007021.1_cds_YP_238700.1_166 [gene=TwortORF122] [protein=ORF122] [protein_id=YP_238700.1] [location=complement(115267..115584)]	56.364	52	33.333	71
>lcl|NC_007021.1_cds_YP_238701.1_167 [gene=TwortORF061] [protein=hypothetical protein] [protein_id=YP_238701.1] [location=complement(115550..116167)]	44.444	31	0	0
>lcl|NC_007021.1_cds_YP_238702.1_168 [gene=TwortORF230] [protein=ORF230] [protein_id=YP_238702.1] [location=115812..115982]	100	98	0	0
>lcl|NC_007021.1_cds_YP_238703.1_169 [gene=TwortORF060] [protein=ORF060] [protein_id=YP_238703.1] [location=complement(116167..116787)]	83.333	12	63.636	96
>lcl|NC_007021.1_cds_YP_238704.1_170 [gene=TwortORF078] [protein=ORF078] [protein_id=YP_238704.1] [location=complement(116793..117260)]	100	99	0	0
>lcl|NC_007021.1_cds_YP_238705.1_171 [gene=TwortORF141] [protein=ORF141] [protein_id=YP_238705.1] [location=complement(117273..117536)]	40	97	0	0
>lcl|NC_007021.1_cds_YP_238706.1_172 [gene=TwortORF046] [protein=ORF046] [protein_id=YP_238706.1] [location=complement(117607..118344)]	26.794	78	28.846	78
>lcl|NC_007021.1_cds_YP_238707.1_173 [gene=TwortORF340] [protein=ORF340] [protein_id=YP_238707.1] [location=118343..118459]	100	97	0	0
>lcl|NC_007021.1_cds_YP_238708.1_174 [gene=TwortORF051] [protein=ORF051] [protein_id=YP_238708.1] [location=complement(118472..119140)]	35.185	24	35.714	30
>lcl|NC_007021.1_cds_YP_238709.1_175 [gene=TwortORF070] [protein=ORF070] [protein_id=YP_238709.1] [location=complement(119232..119768)]	32.927	88	0	0
>lcl|NC_007021.1_cds_YP_238710.1_176 [gene=TwortORF090] [protein=ORF090] [protein_id=YP_238710.1] [location=complement(119774..120199)]	59.259	19	32.168	92
>lcl|NC_007021.1_cds_YP_238711.1_177 [gene=TwortORF213] [protein=ORF213] [protein_id=YP_238711.1] [location=complement(120196..120381)]	37.736	85	0	0
>lcl|NC_007021.1_cds_YP_238712.1_178 [gene=TwortORF066] [protein=ORF066] [protein_id=YP_238712.1] [location=complement(120393..120965)]	48.684	40	0	0
>lcl|NC_007021.1_cds_YP_238713.1_179 [gene=TwortORF184] [protein=ORF184] [protein_id=YP_238713.1] [location=complement(120958..121170)]	40.741	76	42.857	69
>lcl|NC_007021.1_cds_YP_238714.1_180 [gene=TwortORF134] [protein=ORF134] [protein_id=YP_238714.1] [location=complement(121234..121458)]	100	99	0	0
>lcl|NC_007021.1_cds_YP_238715.1_181 [gene=TwortORF069] [protein=ORF069] [protein_id=YP_238715.1] [location=121601..122128]	56	27	38.095	86
>lcl|NC_007021.1_cds_YP_238716.1_182 [gene=TwortORF015] [protein=ORF015] [protein_id=YP_238716.1] [location=complement(122156..123559)]	37.755	20	55.785	99
>lcl|NC_007021.1_cds_YP_238717.1_183 [gene=TwortORF176] [protein=ORF176] [protein_id=YP_238717.1] [location=complement(123525..124082)]	43.925	57	43.511	69
>lcl|NC_007021.1_cds_YP_238718.1_184 [gene=TwortORF221] [protein=ORF221] [protein_id=YP_238718.1] [location=complement(124155..124334)]	62.712	98	0	0
>lcl|NC_007021.1_cds_YP_238719.1_185 [gene=TwortORF180] [protein=ORF180] [protein_id=YP_238719.1] [location=complement(125284..125499)]	35.849	74	0	0
>lcl|NC_007021.1_cds_YP_238720.1_186 [gene=TwortORF222] [protein=ORF222] [protein_id=YP_238720.1] [location=complement(125834..126037)]	33.333	99	0	0
>lcl|NC_007021.1_cds_YP_238721.1_187 [gene=TwortORF158] [protein=ORF158] [protein_id=YP_238721.1] [location=complement(126402..126722)]	40	56	0	0
>lcl|NC_007021.1_cds_YP_238722.1_188 [gene=TwortORF149] [protein=ORF149] [protein_id=YP_238722.1] [location=complement(126788..127039)]	100	99	0	0
>lcl|NC_007021.1_cds_YP_238723.1_189 [gene=TwortORF140] [protein=ORF140] [protein_id=YP_238723.1] [location=127270..127533]	30.303	75	0	0
>lcl|NC_007021.1_cds_YP_238724.1_190 [gene=TwortORF133] [protein=ORF133] [protein_id=YP_238724.1] [location=127508..127786]	48.889	48	0	0
>lcl|NC_007021.1_cds_YP_238725.1_191 [gene=TwortORF092] [protein=ORF092] [protein_id=YP_238725.1] [location=127779..128192]	25	73	0	0
>lcl|NC_007021.1_cds_YP_238726.1_192 [gene=TwortORF151] [protein=ORF151] [protein_id=YP_238726.1] [location=128207..128446]	46.154	49	0	0
>lcl|NC_007021.1_cds_YP_238727.1_193 [gene=TwortORF031] [protein=ORF031] [protein_id=YP_238727.1] [location=128937..129887]	69.565	7	26.846	90
>lcl|NC_007021.1_cds_YP_238728.1_194 [gene=TwortORF059] [protein=ORF059] [protein_id=YP_238728.1] [location=129991..130623]	79.167	11	0	0
>lcl|NC_007021.1_cds_YP_238729.1_195 [gene=TwortORF212] [protein=ORF212] [protein_id=YP_238729.1] [location=complement(130125..130310)]	43.137	81	0	0
NC_000866
>lcl|NC_000866.4_cds_NP_049616.1_1 [gene=rIIA] [protein=rIIA protector from prophage-induced early lysis] [protein_id=NP_049616.1] [location=complement(12..2189)]	98.039	14	52.909	99
>lcl|NC_000866.4_cds_NP_049617.1_2 [gene=rIIA.1] [protein=rIIA.1 hypothetical protein] [protein_id=NP_049617.1] [location=complement(2200..2403)]	65.672	99	72.727	97
>lcl|NC_000866.4_cds_NP_049618.1_3 [gene=60] [protein=gp60 topoisomerase II	large subunit	C-terminal region] [protein_id=NP_049618.1] [location=complement(join(2458..2802	2853..2990))]	58.696	29	83.333	82
>lcl|NC_000866.4_cds_NP_049619.1_4 [gene=60.1] [protein=gp60.1 hypothetical protein] [protein_id=NP_049619.1] [location=complement(2971..3351)]	30.882	99	0	0
>lcl|NC_000866.4_cds_NP_049620.1_5 [gene=mobA] [protein=MobA homing endonuclease pseudogene] [protein_id=NP_049620.1] [location=complement(3654..3767)]	66.667	55	60.606	87
>lcl|NC_000866.4_cds_NP_049621.1_6 [gene=39] [protein=DNA topoisomerase II large subunit] [protein_id=NP_049621.1] [location=complement(3778..5328)]	48.401	91	78.903	91
>lcl|NC_000866.4_cds_NP_049622.1_7 [gene=39.1] [protein=gp39.1 hypothetical protein] [protein_id=NP_049622.1] [location=complement(5398..5595)]	45.161	92	73.77	92
>lcl|NC_000866.4_cds_NP_049623.1_8 [gene=39.2] [protein=gp39.2 hypothetical protein] [protein_id=NP_049623.1] [location=complement(5702..5839)]	47.059	74	90.909	96
>lcl|NC_000866.4_cds_NP_049624.1_9 [gene=goF] [protein=goF mRNA metabolism modulator] [protein_id=NP_049624.1] [location=complement(5842..6267)]	31.707	58	78.723	99
>lcl|NC_000866.4_cds_NP_049625.1_10 [gene=cef] [protein=cef modifier of suppressor tRNAs] [protein_id=NP_049625.1] [location=complement(6267..6482)]	43.75	65	66.176	94
>lcl|NC_000866.4_cds_NP_049626.1_11 [gene=motB] [protein=MotB modifier of transcription] [protein_id=NP_049626.1] [location=complement(6653..7141)]	51.429	21	54.595	99
>lcl|NC_000866.4_cds_NP_049627.1_12 [gene=motB.1] [protein=MotB.1 hypothetical protein] [protein_id=NP_049627.1] [location=complement(7291..7650)]	50	38	36.567	95
>lcl|NC_000866.4_cds_NP_049628.1_13 [gene=motB.2] [protein=MotB.2 hypothetical protein] [protein_id=NP_049628.1] [location=complement(7661..8161)]	28.302	63	68.675	99
>lcl|NC_000866.4_cds_NP_049629.1_14 [gene=dexA] [protein=exonuclease] [protein_id=NP_049629.1] [location=complement(8225..8908)]	32.828	86	68.584	99
>lcl|NC_000866.4_cds_NP_049630.1_15 [gene=dexA.1] [protein=DexA.1 hypothetical protein] [protein_id=NP_049630.1] [location=complement(8908..9150)]	41.026	96	43.59	96
>lcl|NC_000866.4_cds_NP_049631.1_16 [gene=dexA.2] [protein=DexA.2 hypothetical protein] [protein_id=NP_049631.1] [location=complement(9143..9388)]	31.944	87	31.944	87
>lcl|NC_000866.4_cds_NP_049632.1_17 [gene=dda] [protein=Dda DNA helicase] [protein_id=NP_049632.1] [location=complement(9410..10729)]	32.979	21	78.864	99
>lcl|NC_000866.4_cds_NP_049633.1_18 [gene=dda.1] [protein=Dda.1 hypothetical protein] [protein_id=NP_049633.1] [location=complement(10726..11037)]	28.283	95	77.67	99
>lcl|NC_000866.4_cds_NP_049634.1_19 [gene=srd] [protein=Srd anti-sigma factor	putative] [protein_id=NP_049634.1] [location=complement(11039..11785)]	31.429	28	68.421	99
>lcl|NC_000866.4_cds_NP_049635.1_20 [gene=modA] [protein=ModA RNA polymerase ADP-ribosylase] [protein_id=NP_049635.1] [location=complement(11908..12510)]	33.607	55	34.975	96
>lcl|NC_000866.4_cds_NP_049636.1_21 [gene=modB] [protein=ModB ADP-ribosylase] [protein_id=NP_049636.1] [location=complement(12507..13130)]	32.743	53	32.381	99
>lcl|NC_000866.4_cds_NP_049637.1_22 [gene=modA.2] [protein=ModA.2 hypothetical protein] [protein_id=NP_049637.1] [location=complement(13198..13380)]	50	49	43.548	98
>lcl|NC_000866.4_cds_NP_049638.1_23 [gene=modA.3] [protein=ModA.3 hypothetical protein] [protein_id=NP_049638.1] [location=complement(13389..13859)]	93.75	20	31.944	87
>lcl|NC_000866.4_cds_NP_049639.1_24 [gene=modA.4] [protein=ModA.4 hypothetical protein] [protein_id=NP_049639.1] [location=complement(13852..14016)]	79.167	87	78.846	91
>lcl|NC_000866.4_cds_NP_049640.1_25 [gene=srh] [protein=Srh transcription modulator] [protein_id=NP_049640.1] [location=complement(14013..14216)]	37.931	85	58.209	99
>lcl|NC_000866.4_cds_NP_049641.1_26 [gene=mrh] [protein=Mrh transcription modulator under heat shock] [protein_id=NP_049641.1] [location=complement(14191..14676)]	80.645	19	27.673	94
>lcl|NC_000866.4_cds_NP_049642.1_27 [gene=mrh.1] [protein=Mrh.1 hypothetical protein] [protein_id=NP_049642.1] [location=complement(14685..15026)]	100	66	0	0
>lcl|NC_000866.4_cds_NP_049643.1_28 [gene=mrh.2] [protein=Mrh.2 hypothetical protein] [protein_id=NP_049643.1] [location=complement(15026..15232)]	52.727	78	66.667	99
>lcl|NC_000866.4_cds_NP_049644.1_29 [gene=soc] [protein=Soc small outer capsid protein] [protein_id=NP_049644.1] [location=complement(15331..15573)]	55.556	67	48.649	91
>lcl|NC_000866.4_cds_NP_049645.1_30 [gene=segF] [protein=SegF homing endonuclease] [protein_id=NP_049645.1] [location=complement(15606..16280)]	28.571	40	40.206	42
>lcl|NC_000866.4_cds_NP_049646.1_31 [gene=56] [protein=dCTP pyrophosphatase] [protein_id=NP_049646.1] [location=complement(16270..16785)]	42.197	99	80.117	99
>lcl|NC_000866.4_cds_NP_049647.1_32 [gene=dam] [protein=Dam DNA adenine methyltransferase] [protein_id=NP_049647.1] [location=complement(16846..17625)]	27.638	65	74.903	99
>lcl|NC_000866.4_cds_NP_049648.1_33 [gene=61] [protein=DNA primase] [protein_id=NP_049648.1] [location=complement(17935..18963)]	52	15	72.781	98
>lcl|NC_000866.4_cds_NP_049649.1_34 [gene=61.1] [protein=gp61.1 hypothetical protein] [protein_id=NP_049649.1] [location=complement(18966..19130)]	51.351	62	80.952	76
>lcl|NC_000866.4_cds_NP_049650.1_35 [gene=61.2] [protein=gp61.2 hypothetical protein] [protein_id=NP_049650.1] [location=complement(19132..19758)]	35.922	48	65.278	99
>lcl|NC_000866.4_cds_NP_049651.1_36 [gene=sp] [protein=sp spackle periplasmic protein] [protein_id=NP_049651.1] [location=complement(19758..20051)]	64.948	99	70.103	99
>lcl|NC_000866.4_cds_NP_049652.1_37 [gene=61.4] [protein=gp61.4 hypothetical protein] [protein_id=NP_049652.1] [location=complement(20112..20369)]	40.816	57	46.575	79
>lcl|NC_000866.4_cds_NP_049653.1_38 [gene=dmd] [protein=Dmd discriminator of mRNA degradation] [protein_id=NP_049653.1] [location=complement(20371..20553)]	45	98	59.016	95
>lcl|NC_000866.4_cds_NP_049654.1_39 [gene=41] [protein=41 helicase] [protein_id=NP_049654.1] [location=complement(20612..22039)]	50.746	28	85.833	99
>lcl|NC_000866.4_cds_NP_049655.1_40 [gene=40] [protein=gp40 head vertex assembly chaperone] [protein_id=NP_049655.1] [location=complement(22049..22393)]	34.615	45	83.696	80
>lcl|NC_000866.4_cds_NP_049656.2_41 [gene=uvsX] [protein=UvsX RecA-like recombination protein] [protein_id=NP_049656.2] [location=complement(22386..23561)]	100	5	67.436	99
>lcl|NC_000866.4_cds_NP_049657.1_42 [gene=segA] [protein=SegA homing endonuclease] [protein_id=NP_049657.1] [location=complement(23570..24235)]	51.02	20	46.043	63
>lcl|NC_000866.4_cds_NP_049658.1_43 [gene=b-gt] [protein=b-gt beta glucosyl transferase] [protein_id=NP_049658.1] [location=complement(24400..25455)]	100	11	0	0
>lcl|NC_000866.4_cds_NP_049659.1_44 [gene=42] [protein=gp42 dCMP hydroxymethylase] [protein_id=NP_049659.1] [location=complement(25479..26219)]	100	9	28.655	66
>lcl|NC_000866.4_cds_NP_049660.1_45 [gene=imm] [protein=Imm immunity to superinfection membrane protein] [protein_id=NP_049660.1] [location=complement(26373..26624)]	50.98	61	63.855	99
>lcl|NC_000866.4_cds_NP_049661.1_46 [gene=imm.1] [protein=Imm.1 hypothetical predicted membrane protein] [protein_id=NP_049661.1] [location=complement(26636..27013)]	32	98	32	98
>lcl|NC_000866.4_cds_NP_049662.1_47 [gene=43] [protein=DNA polymerase] [protein_id=NP_049662.1] [location=complement(27197..29893)]	50	6	61.709	99
>lcl|NC_000866.4_cds_NP_049663.1_48 [gene=regA] [protein=translation repressor protein] [protein_id=NP_049663.1] [location=complement(29972..30340)]	42.188	98	78.689	99
>lcl|NC_000866.4_cds_NP_049664.1_49 [gene=62] [protein=clamp loader small subunit] [protein_id=NP_049664.1] [location=complement(30342..30905)]	37.037	29	72.414	93
>lcl|NC_000866.4_cds_NP_049665.1_50 [gene=44] [protein=clamp loader	small subunit] [protein_id=NP_049665.1] [location=complement(30907..31866)]	33.906	70	77.188	99
>lcl|NC_000866.4_cds_NP_049666.1_51 [gene=45] [protein=sliding clamp] [protein_id=NP_049666.1] [location=complement(31917..32603)]	32.727	47	78.947	99
>lcl|NC_000866.4_cds_NP_049667.1_52 [gene=rpbA] [protein=RpbA RNA polymerase binding protein	function unknown] [protein_id=NP_049667.1] [location=complement(32659..33048)]	29.412	88	47.009	88
>lcl|NC_000866.4_cds_NP_049668.1_53 [gene=45.2] [protein=gp45.2 conserved hypothetical protein] [protein_id=NP_049668.1] [location=complement(33058..33246)]	33.929	84	75.806	98
>lcl|NC_000866.4_cds_NP_049669.1_54 [gene=46] [protein=endonuclease subunit] [protein_id=NP_049669.1] [location=complement(33302..34984)]	50.769	12	82.826	99
>lcl|NC_000866.4_cds_NP_049670.1_55 [gene=46.1] [protein=gp46.1 hypothetical protein] [protein_id=NP_049670.1] [location=complement(34981..35187)]	31.148	88	41.791	91
>lcl|NC_000866.4_cds_NP_049671.1_56 [gene=46.2] [protein=gp46.2 hypothetical protein] [protein_id=NP_049671.1] [location=complement(35168..35431)]	100	28	54.321	92
>lcl|NC_000866.4_cds_NP_049672.1_57 [gene=47] [protein=endonuclease subunit] [protein_id=NP_049672.1] [location=complement(35428..36447)]	34.286	30	75.516	99
>lcl|NC_000866.4_cds_NP_813808.1_58 [gene=47.1] [protein=gp47.1 hypothetical predicted membrane protein] [protein_id=NP_813808.1] [location=complement(36444..36584)]	80	96	77.778	96
>lcl|NC_000866.4_cds_NP_049673.1_59 [gene=a-gt] [protein=a-gt alpha glucosyl transferase] [protein_id=NP_049673.1] [location=complement(36624..37826)]	89.577	89	0	0
>lcl|NC_000866.4_cds_NP_049674.1_60 [gene=mobB] [protein=MobB homing endonuclease] [protein_id=NP_049674.1] [location=complement(37885..38679)]	59.091	17	45.865	50
>lcl|NC_000866.4_cds_NP_049675.1_61 [gene=a-gt.2] [protein=a-gt.2 hypothetical protein] [protein_id=NP_049675.1] [location=complement(38731..38922)]	53.659	64	75.926	84
>lcl|NC_000866.4_cds_NP_049676.1_62 [gene=a-gt.3] [protein=a-gt.3 hypothetical protein] [protein_id=NP_049676.1] [location=complement(38907..39110)]	40.299	96	70.769	96
>lcl|NC_000866.4_cds_NP_049677.1_63 [gene=a-gt.4] [protein=hypothetical protein] [protein_id=NP_049677.1] [location=complement(39079..39396)]	31.169	71	59.574	89
>lcl|NC_000866.4_cds_NP_049678.1_64 [gene=a-gt.5] [protein=a-gt.5 hypothetical protein] [protein_id=NP_049678.1] [location=complement(39398..39616)]	31.944	97	46.575	99
>lcl|NC_000866.4_cds_NP_049679.1_65 [gene=55] [protein=RNA polymerase sigma factor] [protein_id=NP_049679.1] [location=complement(39600..40157)]	43.333	32	90.659	98
>lcl|NC_000866.4_cds_NP_049680.1_66 [gene=55.1] [protein=gp55.1 hypothetical protein] [protein_id=NP_049680.1] [location=complement(40193..40456)]	34.848	69	71.014	76
>lcl|NC_000866.4_cds_NP_049681.1_67 [gene=55.2] [protein=gp55.2 hypothetical protein] [protein_id=NP_049681.1] [location=complement(40459..40785)]	30.108	78	74.766	98
>lcl|NC_000866.4_cds_NP_049682.1_68 [gene=55.3] [protein=gp55.3 hypothetical protein] [protein_id=NP_049682.1] [location=complement(40799..41038)]	94.118	43	76.19	79
>lcl|NC_000866.4_cds_NP_049683.1_69 [gene=55.4] [protein=gp55.4 conserved hypothetical protein] [protein_id=NP_049683.1] [location=complement(41039..41170)]	57.895	86	88.372	98
>lcl|NC_000866.4_cds_NP_049684.1_70 [gene=55.5] [protein=gp55.5 conserved protein of unknown function] [protein_id=NP_049684.1] [location=complement(41178..41471)]	42.268	99	84.536	99
>lcl|NC_000866.4_cds_NP_049685.1_71 [gene=55.6] [protein=gp55.6 conserved hypothetical protein] [protein_id=NP_049685.1] [location=complement(41464..41646)]	52.542	93	55.738	95
>lcl|NC_000866.4_cds_NP_049686.1_72 [gene=nrdH] [protein=NrdH glutaredoxin] [protein_id=NP_049686.1] [location=complement(41805..42113)]	31.081	69	86	97
>lcl|NC_000866.4_cds_NP_049687.1_73 [gene=55.8] [protein=gp55.8 conserved hypothetical predicted membrane protein] [protein_id=NP_049687.1] [location=complement(42116..42328)]	41.27	89	90	99
>lcl|NC_000866.4_cds_NP_049688.1_74 [gene=nrdG] [protein=NrdG anaerobic NTP reductase	small subunit] [protein_id=NP_049688.1] [location=complement(42446..42916)]	34.028	87	80.128	99
>lcl|NC_000866.4_cds_NP_049689.1_75 [gene=mobC] [protein=MobC homing endonuclease] [protein_id=NP_049689.1] [location=complement(42906..43538)]	65.517	14	41.228	54
>lcl|NC_000866.4_cds_NP_049690.1_76 [gene=nrdD] [protein=NrdD anaerobic NTP reductase	large subunit] [protein_id=NP_049690.1] [location=complement(join(43535..44814	45848..46385))]	48.344	23	98.182	99
>lcl|NC_000866.4_cds_NP_049691.2_77 [gene=I-TevII] [protein=I-TevII homing endonuclease] [protein_id=NP_049691.2] [location=complement(44836..45612)]	30.328	40	0	0
>lcl|NC_000866.4_cds_NP_049692.1_78 [gene=49] [protein=recombination endonuclease VII] [protein_id=NP_049692.1] [location=complement(46382..46855)]	40.625	41	89.809	99
>lcl|NC_000866.4_cds_NP_049693.2_79 [gene=49] [protein=recombination endonuclease VII] [protein_id=NP_049693.2] [location=complement(46382..46699)]	36.842	72	91.429	99
>lcl|NC_000866.4_cds_NP_049694.1_80 [gene=pin] [protein=Pin protease inhibitor] [protein_id=NP_049694.1] [location=complement(46897..47382)]	73.81	26	40.909	27
>lcl|NC_000866.4_cds_NP_049695.1_81 [gene=49.1] [protein=gp49.1 conserved protein of unknown function] [protein_id=NP_049695.1] [location=complement(47366..47521)]	51.064	90	0	0
>lcl|NC_000866.4_cds_NP_049696.1_82 [gene=49.2] [protein=gp49.2 hypothetical protein] [protein_id=NP_049696.1] [location=complement(47506..47826)]	57.778	42	31.707	77
>lcl|NC_000866.4_cds_NP_049697.1_83 [gene=49.3] [protein=gp49.3 hypothetical protein] [protein_id=NP_049697.1] [location=complement(47823..48131)]	41.053	92	79.412	99
>lcl|NC_000866.4_cds_NP_049698.1_84 [gene=nrdC] [protein=NrdC thioredoxin] [protein_id=NP_049698.1] [location=complement(48128..48391)]	28.736	93	90.805	99
>lcl|NC_000866.4_cds_NP_049699.1_85 [gene=nrdC.1] [protein=NrdC.1 conserved hypothetical protein] [protein_id=NP_049699.1] [location=complement(48393..48635)]	37.5	90	69.231	96
>lcl|NC_000866.4_cds_NP_049700.1_86 [gene=nrdC.2] [protein=NrdC.2 conserved hypothetical protein] [protein_id=NP_049700.1] [location=complement(48622..48936)]	40	43	71.154	99
>lcl|NC_000866.4_cds_NP_049701.1_87 [gene=nrdC.3] [protein=NrdC.3 conserved hypothetical protein] [protein_id=NP_049701.1] [location=complement(48933..49859)]	56.329	99	56.646	99
>lcl|NC_000866.4_cds_NP_049702.1_88 [gene=nrdC.4] [protein=NrdC.4 conserved hypothetical protein] [protein_id=NP_049702.1] [location=complement(49914..50915)]	41.57	99	44.282	99
>lcl|NC_000866.4_cds_NP_049703.1_89 [gene=nrdC.5] [protein=NrdC.5 conserved hypothetical protein] [protein_id=NP_049703.1] [location=complement(50973..51995)]	37.681	20	22.807	79
>lcl|NC_000866.4_cds_NP_049704.1_90 [gene=nrdC.6] [protein=NrdC.6 conserved hypothetical protein] [protein_id=NP_049704.1] [location=complement(52066..52893)]	30.435	68	49.724	63
>lcl|NC_000866.4_cds_NP_049705.1_91 [gene=nrdC.7] [protein=NrdC.7 conserved hypothetical	predicted membrane protein] [protein_id=NP_049705.1] [location=complement(52901..53302)]	40	67	44	74
>lcl|NC_000866.4_cds_NP_049706.1_92 [gene=nrdC.8] [protein=NrdC.8 conserved hypothetical protein] [protein_id=NP_049706.1] [location=complement(53358..53885)]	67.568	84	83.429	99
>lcl|NC_000866.4_cds_NP_049707.1_93 [gene=nrdC.9] [protein=NrdC.9 conserved hypothetical protein] [protein_id=NP_049707.1] [location=complement(53946..54248)]	28.788	64	0	0
>lcl|NC_000866.4_cds_NP_049708.1_94 [gene=nrdC.10] [protein=NrdC.10 conserved hypothetical protein] [protein_id=NP_049708.1] [location=complement(54343..55320)]	91.275	46	77.188	97
>lcl|NC_000866.4_cds_NP_049709.1_95 [gene=nrdC.11] [protein=hypothetical protein] [protein_id=NP_049709.1] [location=complement(55435..56445)]	97.778	13	83.735	99
>lcl|NC_000866.4_cds_NP_049710.1_96 [gene=mobD] [protein=MobD homing endonuclease] [protein_id=NP_049710.1] [location=complement(56429..57208)]	39.655	22	57.333	29
>lcl|NC_000866.4_cds_NP_049711.1_97 [gene=mobD.1] [protein=MobD.1 conserved hypothetical protein] [protein_id=NP_049711.1] [location=complement(57283..57828)]	30.851	95	43.103	95
>lcl|NC_000866.4_cds_NP_049712.1_98 [gene=mobD.2] [protein=MobD.2 conserved hypothetical protein] [protein_id=NP_049712.1] [location=complement(57828..57932)]	46.875	91	64.706	97
>lcl|NC_000866.4_cds_NP_813809.1_99 [gene=mobD.2a] [protein=MobD.2a hypothetical protein] [protein_id=NP_813809.1] [location=complement(58049..58165)]	84.211	97	0	0
>lcl|NC_000866.4_cds_NP_049713.1_100 [gene=mobD.3] [protein=MobD.3 hypothetical protein] [protein_id=NP_049713.1] [location=complement(58155..58349)]	64.407	91	66.102	91
>lcl|NC_000866.4_cds_NP_049714.1_101 [gene=mobD.4] [protein=MobD.4 hypothetical protein] [protein_id=NP_049714.1] [location=complement(58352..58534)]	78.788	51	0	0
>lcl|NC_000866.4_cds_NP_049715.1_102 [gene=mobD.5] [protein=MobD.5 hypothetical protein] [protein_id=NP_049715.1] [location=complement(58534..58722)]	100	41	0	0
>lcl|NC_000866.4_cds_NP_049716.1_103 [gene=rI.-1] [protein=hypothetical protein] [protein_id=NP_049716.1] [location=complement(58819..59205)]	32	58	57.031	99
>lcl|NC_000866.4_cds_NP_049717.1_104 [gene=rI] [protein=rI lysis inhibition regulator	membrane protein] [protein_id=NP_049717.1] [location=complement(59202..59495)]	36.066	62	52.083	97
>lcl|NC_000866.4_cds_NP_049718.1_105 [gene=rI.1] [protein=rI.1 conserved hypothetical protein] [protein_id=NP_049718.1] [location=complement(59508..59720)]	54.286	99	63.768	97
>lcl|NC_000866.4_cds_NP_049719.1_106 [gene=tk] [protein=Tk thymidine kinase] [protein_id=NP_049719.1] [location=complement(59763..60344)]	46.154	20	81.347	99
>lcl|NC_000866.4_cds_NP_049720.1_107 [gene=tk.1] [protein=Tk.1 conserved hypothetical protein] [protein_id=NP_049720.1] [location=complement(60346..60534)]	40	95	59.322	94
>lcl|NC_000866.4_cds_NP_049721.1_108 [gene=tk.2] [protein=Tk.2 conserved hypothetical protein] [protein_id=NP_049721.1] [location=complement(60531..60716)]	45.098	82	55.738	98
>lcl|NC_000866.4_cds_NP_049722.1_109 [gene=tk.3] [protein=Tk.2 conserved hypothetical protein] [protein_id=NP_049722.1] [location=complement(60713..60925)]	70	99	77.143	99
>lcl|NC_000866.4_cds_NP_049723.1_110 [gene=tk.4] [protein=hypothetical protein] [protein_id=NP_049723.1] [location=complement(60922..61389)]	31.008	81	85.161	99
>lcl|NC_000866.4_cds_NP_049724.1_111 [gene=vs] [protein=Vs valyl-tRNA synthetase modifier] [protein_id=NP_049724.1] [location=complement(61386..61733)]	30.769	97	65.455	94
>lcl|NC_000866.4_cds_NP_049725.1_112 [gene=vs.1] [protein=Vs.1 conserved hypothetical protein] [protein_id=NP_049725.1] [location=complement(61726..62271)]	82.609	13	83.146	98
>lcl|NC_000866.4_cds_NP_049726.1_113 [gene=regB] [protein=RegB site-specific RNA endonuclease] [protein_id=NP_049726.1] [location=complement(62279..62740)]	44.348	73	77.483	98
>lcl|NC_000866.4_cds_NP_049727.1_114 [gene=vs.3] [protein=Vs.3 conserved hypothetical protein] [protein_id=NP_049727.1] [location=complement(62800..63078)]	42.105	61	40	70
>lcl|NC_000866.4_cds_NP_049728.1_115 [gene=vs.4] [protein=Vs.4 conserved hypothetical protein] [protein_id=NP_049728.1] [location=complement(63078..63344)]	58	56	64.13	99
>lcl|NC_000866.4_cds_NP_049729.1_116 [gene=vs.5] [protein=Vs.5 conserved hypothetical protein] [protein_id=NP_049729.1] [location=complement(63381..63557)]	46.512	68	69.565	78
>lcl|NC_000866.4_cds_NP_049730.1_117 [gene=vs.6] [protein=Vs.6 conserved hypothetical protein] [protein_id=NP_049730.1] [location=complement(63557..63919)]	42.4	99	94.167	99
>lcl|NC_000866.4_cds_NP_049731.1_118 [gene=vs.7] [protein=Vs.7 conserved hypothetical protein] [protein_id=NP_049731.1] [location=complement(63927..64256)]	37.037	98	63.303	99
>lcl|NC_000866.4_cds_NP_049732.1_119 [gene=vs.8] [protein=Vs.8 conserved hypothetical protein] [protein_id=NP_049732.1] [location=complement(64253..64912)]	100	8	87.425	76
>lcl|NC_000866.4_cds_NP_049733.1_120 [gene=denV] [protein=DenV endonuclease V	N-glycosylase UV repair enzyme] [protein_id=NP_049733.1] [location=complement(64939..65355)]	78.378	27	97.101	99
>lcl|NC_000866.4_cds_NP_049734.1_121 [gene=ipII] [protein=IpII internal head protein] [protein_id=NP_049734.1] [location=complement(65416..65718)]	94.186	85	95.349	85
>lcl|NC_000866.4_cds_NP_049735.1_122 [gene=ipIII] [protein=IpIII internal head protein] [protein_id=NP_049735.1] [location=complement(65834..66415)]	74.737	98	91.667	99
>lcl|NC_000866.4_cds_NP_049736.1_123 [gene=e] [protein=e Lysozyme murein hydrolase] [protein_id=NP_049736.1] [location=complement(66503..66997)]	33.742	98	81.988	98
>lcl|NC_000866.4_cds_NP_049737.1_124 [gene=nudE] [protein=NudE nudix hydrolase] [protein_id=NP_049737.1] [location=complement(67035..67490)]	36.066	80	63.265	97
>lcl|NC_000866.4_cds_NP_049738.1_125 [gene=e.2] [protein=e.2 conserved hypothetical	predicted membrane protein] [protein_id=NP_049738.1] [location=complement(67652..67960)]	38.318	99	37.383	99
>lcl|NC_000866.4_cds_NP_049739.1_126 [gene=e.3] [protein=e.3 conserved hypothetical	predicted membrane protein] [protein_id=NP_049739.1] [location=complement(67957..68319)]	34.454	98	0	0
>lcl|NC_000866.4_cds_NP_049740.1_127 [gene=e.4] [protein=e.4 conserved hypothetical	predicted membrane protein] [protein_id=NP_049740.1] [location=complement(68301..68693)]	52.83	40	50.413	92
>lcl|NC_000866.4_cds_NP_049741.1_128 [gene=e.5] [protein=e.5 conserved hypothetical protein] [protein_id=NP_049741.1] [location=complement(68662..69270)]	47.396	95	46.939	97
>lcl|NC_000866.4_cds_NP_049742.1_129 [gene=e.6] [protein=e.6 conserved hypothetical protein] [protein_id=NP_049742.1] [location=complement(69312..69905)]	31.183	47	87.817	99
>lcl|NC_000866.4_cds_NP_049743.1_130 [gene=e.7] [protein=e.7 hypothetical protein] [protein_id=NP_049743.1] [location=complement(69968..70303)]	87.5	71	0	0
>lcl|NC_000866.4_cds_NP_049744.1_131 [gene=e.8] [protein=e.8 conserved hypothetical protein] [protein_id=NP_049744.1] [location=complement(70360..70623)]	100	52	93.103	99
>lcl|NC_000866.4_cds_NP_049745.2_132 [gene=segB] [protein=SegB homing endonuclease] [protein_id=NP_049745.2] [location=complement(71253..71918)]	36.364	33	56.164	33
>lcl|NC_000866.4_cds_NP_049746.1_133 [gene=trna.2] [protein=Trna.2 conserved hypothetical protein] [protein_id=NP_049746.1] [location=complement(72628..72915)]	52.326	90	84.615	95
>lcl|NC_000866.4_cds_NP_049747.1_134 [gene=trna.3] [protein=Trna.3 conserved hypothetical protein] [protein_id=NP_049747.1] [location=complement(72918..73328)]	62.687	49	62.879	96
>lcl|NC_000866.4_cds_NP_049748.1_135 [gene=trna.4] [protein=Trna.4 conserved hypothetical predicted membrane protein] [protein_id=NP_049748.1] [location=complement(73329..73514)]	39.655	94	85.246	98
>lcl|NC_000866.4_cds_NP_049749.1_136 [gene=ipI] [protein=IpI internal head protein] [protein_id=NP_049749.1] [location=complement(73591..73878)]	52.128	98	0	0
>lcl|NC_000866.4_cds_NP_049750.1_137 [gene=57B] [protein=hypothetical protein] [protein_id=NP_049750.1] [location=complement(73952..74410)]	41.176	77	85.43	99
>lcl|NC_000866.4_cds_NP_049751.1_138 [gene=57A] [protein=gp57A chaperone for tail fiber formation] [protein_id=NP_049751.1] [location=complement(74407..74649)]	35.211	84	63.235	84
>lcl|NC_000866.4_cds_NP_049752.1_139 [gene=1] [protein=deoxynucleoside monophosphate kinase] [protein_id=NP_049752.1] [location=complement(74649..75374)]	100	11	61.475	99
>lcl|NC_000866.4_cds_NP_049753.1_140 [gene=3] [protein=tail completion and sheath stabilizer protein] [protein_id=NP_049753.1] [location=complement(75424..75954)]	25.694	75	65.896	98
>lcl|NC_000866.4_cds_NP_049754.1_141 [gene=2] [protein=DNA end protector protein] [protein_id=NP_049754.1] [location=complement(76061..76885)]	25.62	44	77.206	99
>lcl|NC_000866.4_cds_NP_049755.1_142 [gene=4] [protein=head completion protein] [protein_id=NP_049755.1] [location=complement(76885..77337)]	55.882	23	88.591	99
>lcl|NC_000866.4_cds_NP_049756.1_143 [gene=53] [protein=baseplate wedge subunit] [protein_id=NP_049756.1] [location=77385..77975]	34.426	27	84.656	96
>lcl|NC_000866.4_cds_NP_049757.1_144 [gene=5] [protein=baseplate hub subunit and tail lysozyme] [protein_id=NP_049757.1] [location=77959..79686]	38.554	14	77.5	97
>lcl|NC_000866.4_cds_NP_049758.1_145 [gene=repEB] [protein=RepEB oriE replication initiation protein] [protein_id=NP_049758.1] [location=complement(77981..78118)]	53.333	96	68.889	98
>lcl|NC_000866.4_cds_NP_049759.1_146 [gene=repEA] [protein=RepEA oriE replication initiation protein] [protein_id=NP_049759.1] [location=complement(79085..79237)]	48.936	92	90	98
>lcl|NC_000866.4_cds_NP_049760.1_147 [gene=5.1] [protein=hypothetical protein] [protein_id=NP_049760.1] [location=79721..80215]	25.49	62	68.902	99
>lcl|NC_000866.4_cds_NP_049761.1_148 [gene=segC] [protein=SegC homing endonuclease] [protein_id=NP_049761.1] [location=80196..80618]	51.22	29	44.275	90
>lcl|NC_000866.4_cds_NP_049762.1_149 [gene=5.3] [protein=gp5.3 conserved hypothetical protein] [protein_id=NP_049762.1] [location=80621..80791]	41.026	68	52.273	77
>lcl|NC_000866.4_cds_NP_049763.1_150 [gene=5.4] [protein=gp5.4 conserved hypothetical protein] [protein_id=NP_049763.1] [location=80779..81072]	31.765	86	93.814	99
>lcl|NC_000866.4_cds_NP_049764.1_151 [gene=6] [protein=baseplate wedge subunit] [protein_id=NP_049764.1] [location=81081..83063]	63.333	14	86.667	99
>lcl|NC_000866.4_cds_NP_049765.1_152 [gene=7] [protein=baseplate wedge subunit] [protein_id=NP_049765.1] [location=83060..86158]	62.338	7	79.651	99
>lcl|NC_000866.4_cds_NP_049766.1_153 [gene=8] [protein=baseplate wedge subunit] [protein_id=NP_049766.1] [location=86151..87155]	25.221	63	88.623	99
>lcl|NC_000866.4_cds_NP_049767.1_154 [gene=9] [protein=baseplate wedge tail fiber connector] [protein_id=NP_049767.1] [location=87219..88085]	38.983	20	72.222	99
>lcl|NC_000866.4_cds_NP_049768.1_155 [gene=10] [protein=baseplate wedge subunit and tail pin] [protein_id=NP_049768.1] [location=88085..89893]	73.077	4	77.483	99
>lcl|NC_000866.4_cds_NP_049769.1_156 [gene=11] [protein=baseplate wedge subunit and tail pin] [protein_id=NP_049769.1] [location=89893..90552]	22.439	84	67.58	99
>lcl|NC_000866.4_cds_NP_049770.1_157 [gene=12] [protein=gp12 Short tail fibers] [protein_id=NP_049770.1] [location=90549..92132]	43.077	11	61.742	99
>lcl|NC_000866.4_cds_NP_049771.1_158 [gene=wac] [protein=fibritin] [protein_id=NP_049771.1] [location=92129..93592]	29.63	22	56.25	98
>lcl|NC_000866.4_cds_NP_049772.1_159 [gene=13] [protein=neck protein] [protein_id=NP_049772.1] [location=93624..94553]	38.462	17	84.229	90
>lcl|NC_000866.4_cds_NP_049773.1_160 [gene=14] [protein=neck protein] [protein_id=NP_049773.1] [location=94555..95325]	28.148	49	68.75	99
>lcl|NC_000866.4_cds_NP_049774.1_161 [gene=15] [protein=tail sheath stabilizer and completion protein] [protein_id=NP_049774.1] [location=95367..96185]	24.59	44	55.839	95
>lcl|NC_000866.4_cds_NP_049775.1_162 [gene=16] [protein=small terminase protein] [protein_id=NP_049775.1] [location=96194..96688]	26	61	80.368	99
>lcl|NC_000866.4_cds_NP_049776.1_163 [gene=17] [protein=large terminase protein] [protein_id=NP_049776.1] [location=96672..98504]	50	12	82.815	99
>lcl|NC_000866.4_cds_NP_049777.1_164 [gene=17] [protein=large terminase protein] [protein_id=NP_049777.1] [location=96933..98504]	25.789	36	84.16	99
>lcl|NC_000866.4_cds_NP_049778.1_165 [gene=17] [protein=large terminase protein] [protein_id=NP_049778.1] [location=96987..98504]	25.824	35	83.794	99
>lcl|NC_000866.4_cds_NP_049779.1_166 [gene=17] [protein=large terminase protein] [protein_id=NP_049779.1] [location=97254..98504]	30	19	81.535	99
>lcl|NC_000866.4_cds_NP_049780.1_167 [gene=18] [protein=tail sheath protein] [protein_id=NP_049780.1] [location=98536..100515]	52.778	5	71.537	99
>lcl|NC_000866.4_cds_NP_049781.1_168 [gene=19] [protein=tail tube protein] [protein_id=NP_049781.1] [location=100632..101123]	42	26	71.779	99
>lcl|NC_000866.4_cds_NP_049782.1_169 [gene=20] [protein=portal vertex protein] [protein_id=NP_049782.1] [location=101207..102781]	100	5	75.717	99
>lcl|NC_000866.4_cds_NP_049783.1_170 [gene=67] [protein=prohead core protein] [protein_id=NP_049783.1] [location=102781..103023]	40.476	52	55.556	56
>lcl|NC_000866.4_cds_NP_049784.1_171 [gene=68] [protein=prohead core protein] [protein_id=NP_049784.1] [location=103023..103448]	48.529	44	71.429	83
>lcl|NC_000866.4_cds_NP_049785.1_172 [gene=21] [protein=prohead core scaffolding protein and protease] [protein_id=NP_049785.1] [location=103448..104086]	40.741	24	88.832	92
>lcl|NC_000866.4_cds_NP_813810.1_173 [gene=21] [protein=prohead core scaffolding protein and protease] [protein_id=NP_813810.1] [location=103514..104086]	40.741	27	89.266	93
>lcl|NC_000866.4_cds_NP_049786.1_174 [gene=22] [protein=prohead core protein] [protein_id=NP_049786.1] [location=104117..104926]	42.5	15	77.407	99
>lcl|NC_000866.4_cds_NP_049787.1_175 [gene=23] [protein=major capsid protein] [protein_id=NP_049787.1] [location=104945..106510]	54.412	13	84.139	99
>lcl|NC_000866.4_cds_NP_049788.2_176 [gene=segD] [protein=SegD homing endonuclease] [protein_id=NP_049788.2] [location=complement(106561..107232)]	54.054	17	41.589	96
>lcl|NC_000866.4_cds_NP_049789.1_177 [gene=24] [protein=capsid vertex protein] [protein_id=NP_049789.1] [location=107323..108606]	100	6	70.047	99
>lcl|NC_000866.4_cds_NP_049790.1_178 [gene=rnlB] [protein=RnlB RNA ligase 2] [protein_id=NP_049790.1] [location=complement(108636..109640)]	38.806	19	71.557	99
>lcl|NC_000866.4_cds_NP_049791.1_179 [gene=24.2] [protein=gp24.2 conserved hypothetical protein] [protein_id=NP_049791.1] [location=complement(109650..109928)]	53.659	88	0	0
>lcl|NC_000866.4_cds_NP_049792.1_180 [gene=24.3] [protein=gp24.3 conserved hypothetical protein] [protein_id=NP_049792.1] [location=complement(109915..110085)]	38.462	91	45.455	77
>lcl|NC_000866.4_cds_NP_049793.1_181 [gene=hoc] [protein=Hoc head outer capsid protein] [protein_id=NP_049793.1] [location=complement(110187..111317)]	51.282	10	58.889	71
>lcl|NC_000866.4_cds_NP_049794.1_182 [gene=inh] [protein=Inh inhibitor of prohead protease gp21] [protein_id=NP_049794.1] [location=complement(111327..112007)]	53.333	13	65.351	99
>lcl|NC_000866.4_cds_NP_049795.1_183 [gene=segE] [protein=SegE homing endonuclease] [protein_id=NP_049795.1] [location=112057..112674]	51.282	19	47.872	46
>lcl|NC_000866.4_cds_NP_049796.1_184 [gene=uvsW] [protein=UvsW helicase] [protein_id=NP_049796.1] [location=112677..114440]	40.299	10	72.311	85
>lcl|NC_000866.4_cds_NP_049797.1_185 [gene=uvsY.-2] [protein=hypothetical protein] [protein_id=NP_049797.1] [location=complement(114496..114663)]	44.444	64	85	71
>lcl|NC_000866.4_cds_NP_049798.1_186 [gene=uvsY.-1] [protein=UvsY.-1 conserved hypothetical protein] [protein_id=NP_049798.1] [location=complement(114690..114914)]	70.833	96	0	0
>lcl|NC_000866.4_cds_NP_049799.2_187 [gene=uvsY] [protein=UvsY recombination	repair and ssDNA binding protein] [protein_id=NP_049799.2] [location=complement(114914..115327)]	23.423	77	59.854	99
>lcl|NC_000866.4_cds_NP_049800.1_188 [gene=25] [protein=baseplate wedge subunit] [protein_id=NP_049800.1] [location=complement(115404..115802)]	96.154	20	66.406	96
>lcl|NC_000866.4_cds_NP_049801.1_189 [gene=26] [protein=gp26 baseplate hub subunit] [protein_id=NP_049801.1] [location=complement(115802..116428)]	100	12	49.515	98
>lcl|NC_000866.4_cds_NP_813811.1_190 [gene=26'] [protein=gp26' internal in-frame translation initiation] [protein_id=NP_813811.1] [location=complement(115802..116089)]	29.73	77	52.083	99
>lcl|NC_000866.4_cds_NP_049802.1_191 [gene=51] [protein=baseplate hub assembly protein] [protein_id=NP_049802.1] [location=116479..117228]	25.862	66	51.012	99
>lcl|NC_000866.4_cds_NP_049803.1_192 [gene=27] [protein=baseplate hub subunit] [protein_id=NP_049803.1] [location=117228..118403]	93.75	8	63.369	95
>lcl|NC_000866.4_cds_NP_049804.2_193 [gene=28] [protein=gp28 baseplate hub distal subunit] [protein_id=NP_049804.2] [location=118348..118881]	35.714	39	51.266	89
>lcl|NC_000866.4_cds_NP_049805.1_194 [gene=29] [protein=gp29 baseplate hub subunit	tail length determinator] [protein_id=NP_049805.1] [location=118878..120650]	27.089	58	34.158	99
>lcl|NC_000866.4_cds_NP_049806.1_195 [gene=48] [protein=baseplate subunit] [protein_id=NP_049806.1] [location=120659..121753]	24.664	61	59.945	99
>lcl|NC_000866.4_cds_NP_049807.1_196 [gene=54] [protein=baseplate subunit] [protein_id=NP_049807.1] [location=121753..122715]	70	9	68.248	85
>lcl|NC_000866.4_cds_NP_049808.1_197 [gene=alt.-3] [protein=Alt.-3 conserved hypothetical protein] [protein_id=NP_049808.1] [location=complement(122742..123032)]	35.417	98	58.333	99
>lcl|NC_000866.4_cds_NP_049809.1_198 [gene=alt.-2] [protein=Alt.-2 hypothetical protein] [protein_id=NP_049809.1] [location=complement(123065..123268)]	33.333	74	35.294	74
>lcl|NC_000866.4_cds_NP_049810.1_199 [gene=alt.-1] [protein=Alt.-1 hypothetical protein] [protein_id=NP_049810.1] [location=complement(123265..123450)]	36.066	97	49.057	82
>lcl|NC_000866.4_cds_NP_049811.1_200 [gene=alt] [protein=ADP-ribosyltransferase] [protein_id=NP_049811.1] [location=complement(123454..125502)]	58.182	8	47.361	99
>lcl|NC_000866.4_cds_NP_049812.1_201 [gene=alt.1] [protein=Alt.1 conserved hypothetical protein] [protein_id=NP_049812.1] [location=complement(125560..125748)]	45.313	95	66.667	95
>lcl|NC_000866.4_cds_NP_049813.1_202 [gene=30] [protein=DNA ligase] [protein_id=NP_049813.1] [location=complement(125745..127208)]	68.571	7	61.988	99
>lcl|NC_000866.4_cds_NP_049814.1_203 [gene=30.1] [protein=gp30.1 conserved hypothetical protein] [protein_id=NP_049814.1] [location=complement(127205..127474)]	43.333	88	43.333	88
>lcl|NC_000866.4_cds_NP_049815.1_204 [gene=30.2] [protein=hypothetical protein] [protein_id=NP_049815.1] [location=complement(127474..128310)]	28.467	48	74.227	68
>lcl|NC_000866.4_cds_NP_049816.1_205 [gene=30.3] [protein=hypothetical protein] [protein_id=NP_049816.1] [location=complement(128307..128765)]	64.706	22	85.526	99
>lcl|NC_000866.4_cds_NP_049817.1_206 [gene=30.3'] [protein=gp30.3' hypothetical protein] [protein_id=NP_049817.1] [location=complement(128402..128629)]	26.667	99	86.486	97
>lcl|NC_000866.4_cds_NP_049818.1_207 [gene=30.4] [protein=gp30.4 conserved hypothetical protein] [protein_id=NP_049818.1] [location=complement(128758..128964)]	61.538	38	45.588	97
>lcl|NC_000866.4_cds_NP_049819.1_208 [gene=30.5] [protein=gp30.5 hypothetical protein] [protein_id=NP_049819.1] [location=complement(128961..129158)]	41.379	88	68.254	95
>lcl|NC_000866.4_cds_NP_049820.1_209 [gene=30.6] [protein=gp30.6 conserved hypothetical protein] [protein_id=NP_049820.1] [location=complement(129158..129445)]	33.333	71	83.158	99
>lcl|NC_000866.4_cds_NP_049821.1_210 [gene=30.7] [protein=gp30.7 conserved hypothetical protein] [protein_id=NP_049821.1] [location=complement(129487..129852)]	88.889	22	92.562	99
>lcl|NC_000866.4_cds_NP_049822.1_211 [gene=30.8] [protein=gp30.8 conserved hypothetical protein] [protein_id=NP_049822.1] [location=complement(129921..130253)]	33.333	78	78.182	99
>lcl|NC_000866.4_cds_NP_049823.1_212 [gene=30.9] [protein=gp30.9 conserved hypothetical protein] [protein_id=NP_049823.1] [location=complement(130364..130540)]	60	68	69.767	73
>lcl|NC_000866.4_cds_NP_049824.1_213 [gene=rIII] [protein=rIII lysis inhibition accessory protein	rapid lysis phenotype] [protein_id=NP_049824.1] [location=complement(130785..131033)]	75	29	89.024	99
>lcl|NC_000866.4_cds_NP_049825.1_214 [gene=31] [protein=gp31 head assembly cochaperone with GroEL] [protein_id=NP_049825.1] [location=complement(131181..131516)]	34.314	90	82.075	95
>lcl|NC_000866.4_cds_NP_049826.1_215 [gene=31.1] [protein=gp31.1 conserved hypothetical protein] [protein_id=NP_049826.1] [location=complement(131573..131881)]	29.213	79	44.33	94
>lcl|NC_000866.4_cds_NP_049827.1_216 [gene=31.2] [protein=gp31.2 hypothetical protein] [protein_id=NP_049827.1] [location=complement(131882..132118)]	94.872	49	48.684	96
>lcl|NC_000866.4_cds_NP_049828.1_217 [gene=cd] [protein=deoxycytidylate deaminase] [protein_id=NP_049828.1] [location=complement(132118..132699)]	31.176	86	69.231	99
>lcl|NC_000866.4_cds_NP_049829.1_218 [gene=cd.1] [protein=Cd.1 hypothetical protein] [protein_id=NP_049829.1] [location=complement(132696..133034)]	34.783	60	0	0
>lcl|NC_000866.4_cds_NP_049830.1_219 [gene=cd.2] [protein=Cd.2 conserved hypothetical protein] [protein_id=NP_049830.1] [location=complement(133031..133261)]	53.425	90	63.768	90
>lcl|NC_000866.4_cds_NP_049831.1_220 [gene=cd.3] [protein=Cd.3 conserved hypothetical protein] [protein_id=NP_049831.1] [location=complement(133334..133609)]	42.391	99	43.478	99
>lcl|NC_000866.4_cds_NP_049832.1_221 [gene=cd.4] [protein=Cd.4 conserved hypothetical protein] [protein_id=NP_049832.1] [location=complement(133612..133812)]	43.548	93	53.846	97
>lcl|NC_000866.4_cds_NP_049833.1_222 [gene=cd.5] [protein=Cd.5 hypothetical protein] [protein_id=NP_049833.1] [location=complement(133805..134032)]	48.276	76	36.364	72
>lcl|NC_000866.4_cds_NP_049834.1_223 [gene=pseT] [protein=polynucleotide kinase] [protein_id=NP_049834.1] [location=complement(134002..134907)]	40.206	32	90.033	99
>lcl|NC_000866.4_cds_NP_049835.1_224 [gene=pseT.1] [protein=PseT.1 conserved hypothetical protein] [protein_id=NP_049835.1] [location=complement(134908..135135)]	82.353	89	0	0
>lcl|NC_000866.4_cds_NP_049836.2_225 [gene=pseT.2] [protein=PseT.2 conserved hypothetical protein] [protein_id=NP_049836.2] [location=complement(135132..135431)]	32.927	71	68.687	99
>lcl|NC_000866.4_cds_NP_049837.1_226 [gene=pseT.3] [protein=PseT.3 conserved hypothetical predicted membrane protein] [protein_id=NP_049837.1] [location=complement(135428..135781)]	73.077	22	0	0
>lcl|NC_000866.4_cds_NP_049838.1_227 [gene=alc] [protein=Alc inhibitor of host transcription] [protein_id=NP_049838.1] [location=complement(135772..136275)]	57.576	20	50.296	99
>lcl|NC_000866.4_cds_NP_049839.1_228 [gene=rnlA] [protein=RNA ligase A] [protein_id=NP_049839.1] [location=complement(136340..137464)]	50.633	21	49.337	99
>lcl|NC_000866.4_cds_NP_049840.1_229 [gene=denA] [protein=endonuclease II] [protein_id=NP_049840.1] [location=complement(137517..137951)]	28.846	71	73.611	99
>lcl|NC_000866.4_cds_NP_049841.1_230 [gene=nrdB] [protein=NrdB aerobic NDP reductase	small subunit] [protein_id=NP_049841.1] [location=complement(join(137955..138457	139056..139719))]	86.885	16	85.57	99
>lcl|NC_000866.4_cds_NP_049842.1_231 [gene=I-TevIII] [protein=I-TevIII homing endonuclease (defective)] [protein_id=NP_049842.1] [location=complement(138593..138886)]	54.545	34	32.927	79
>lcl|NC_000866.4_cds_NP_049843.1_232 [gene=nrdB.1] [protein=Nrd.1 hypothetical protein] [protein_id=NP_049843.1] [location=complement(139716..139967)]	57.692	31	46.939	58
>lcl|NC_000866.4_cds_NP_049844.1_233 [gene=mobE] [protein=MobE homing endonuclease] [protein_id=NP_049844.1] [location=complement(139991..140416)]	52.5	25	48.333	84
>lcl|NC_000866.4_cds_NP_049845.1_234 [gene=nrdA] [protein=ribonucleoside-diphosphate reductase subunit alpha] [protein_id=NP_049845.1] [location=complement(140416..142680)]	37.634	12	88.682	99
>lcl|NC_000866.4_cds_NP_049846.1_235 [gene=nrdA.1] [protein=NrdA.1 conserved hypothetical protein] [protein_id=NP_049846.1] [location=complement(142671..142997)]	58.696	42	68.367	90
>lcl|NC_000866.4_cds_NP_049847.1_236 [gene=nrdA.2] [protein=NrdA.2 conserved hypothetical protein] [protein_id=NP_049847.1] [location=complement(142951..143214)]	34.667	85	0	0
>lcl|NC_000866.4_cds_NP_049848.1_237 [gene=td] [protein=dTMP (thymidylate) synthase] [protein_id=NP_049848.1] [location=complement(join(143235..143546	144564..145112))]	100	13	80.488	99
>lcl|NC_000866.4_cds_NP_049849.3_238 [gene=I-TevI] [protein=I-TevI homing endonuclease] [protein_id=NP_049849.3] [location=complement(143694..144431)]	100	13	46.316	37
>lcl|NC_000866.4_cds_NP_049850.1_239 [gene=frd] [protein=Frd dihydrofolate reductase] [protein_id=NP_049850.1] [location=complement(145109..145690)]	43.182	23	84.974	99
>lcl|NC_000866.4_cds_NP_049851.1_240 [gene=frd.1] [protein=Frd.1 conserved hypothetical protein] [protein_id=NP_049851.1] [location=complement(145762..146004)]	35.616	75	70.886	98
>lcl|NC_000866.4_cds_NP_049852.1_241 [gene=frd.2] [protein=Frd.2 conserved hypothetical protein] [protein_id=NP_049852.1] [location=complement(146143..146529)]	31.008	98	99.219	99
>lcl|NC_000866.4_cds_NP_049853.1_242 [gene=frd.3] [protein=Frd.3 hypothetical protein] [protein_id=NP_049853.1] [location=complement(146575..146802)]	57.333	99	100	99
>lcl|NC_000866.4_cds_NP_049854.1_243 [gene=32] [protein=single-stranded DNA binding protein] [protein_id=NP_049854.1] [location=complement(146948..147853)]	100	5	64.831	78
>lcl|NC_000866.4_cds_NP_049855.1_244 [gene=SegG] [protein=SegG homing endonuclease] [protein_id=NP_049855.1] [location=complement(147909..148541)]	39.806	47	58.049	97
>lcl|NC_000866.4_cds_NP_049856.1_245 [gene=59] [protein=59 protein] [protein_id=NP_049856.1] [location=complement(148543..149196)]	51.22	37	76.037	99
>lcl|NC_000866.4_cds_NP_049857.1_246 [gene=33] [protein=gp33 late promoter transcription accessory protein] [protein_id=NP_049857.1] [location=complement(149193..149531)]	41.333	65	65.823	70
>lcl|NC_000866.4_cds_NP_049858.1_247 [gene=dsbA] [protein=double-stranded DNA binding protein] [protein_id=NP_049858.1] [location=complement(149509..149778)]	46.296	60	61.364	97
>lcl|NC_000866.4_cds_NP_049859.1_248 [gene=rnh] [protein=RnaseH] [protein_id=NP_049859.1] [location=complement(149787..150704)]	97.368	12	55.449	99
>lcl|NC_000866.4_cds_NP_049860.1_249 [gene=34] [protein=long tail fiber	proximal subunit] [protein_id=NP_049860.1] [location=150809..154678]	40.299	5	52.563	99
>lcl|NC_000866.4_cds_NP_049861.1_250 [gene=35] [protein=gp35 hinge connector of long tail fiber	proximal connector] [protein_id=NP_049861.1] [location=154687..155805]	90	11	45.867	99
>lcl|NC_000866.4_cds_NP_049862.1_251 [gene=36] [protein=gp36 hinge connector of long tail fiber	distal connector] [protein_id=NP_049862.1] [location=155868..156533]	38.636	20	72.222	81
>lcl|NC_000866.4_cds_NP_049863.1_252 [gene=37] [protein=gp37 long tail fiber	distal subunit] [protein_id=NP_049863.1] [location=156542..159622]	41.538	6	34.875	72
>lcl|NC_000866.4_cds_NP_049864.1_253 [gene=38] [protein=gp38 distal long tail fiber assembly catalyst] [protein_id=NP_049864.1] [location=159649..160200]	75	76	26.816	92
>lcl|NC_000866.4_cds_NP_049865.1_254 [gene=t] [protein=t holin lysis mediator] [protein_id=NP_049865.1] [location=160221..160877]	100	16	97.706	99
>lcl|NC_000866.4_cds_NP_049866.1_255 [gene=asiA] [protein=AsiA anti-sigma 70 protein] [protein_id=NP_049866.1] [location=complement(160878..161150)]	30.263	81	100	99
>lcl|NC_000866.4_cds_NP_049867.1_256 [gene=asiA.1] [protein=AsiA.1 hypothetical protein] [protein_id=NP_049867.1] [location=complement(161163..161315)]	92	98	94	98
>lcl|NC_000866.4_cds_NP_049868.1_257 [gene=arn] [protein=Arn inhibitor of MrcBC restriction endonuclease (anti-restriction nuclease)] [protein_id=NP_049868.1] [location=complement(161312..161590)]	95.556	48	97.826	99
>lcl|NC_000866.4_cds_NP_049869.1_258 [gene=arn.1] [protein=Arn.1 conserved hypothetical protein] [protein_id=NP_049869.1] [location=complement(161674..161805)]	67.568	84	0	0
>lcl|NC_000866.4_cds_NP_049870.1_259 [gene=arn.2] [protein=Arn.2 conserved hypothetical protein] [protein_id=NP_049870.1] [location=complement(161876..162172)]	35.714	99	93.182	89
>lcl|NC_000866.4_cds_NP_049871.1_260 [gene=arn.3] [protein=Arn.3 conserved hypothetical protein] [protein_id=NP_049871.1] [location=complement(162172..162630)]	55	25	77.124	99
>lcl|NC_000866.4_cds_NP_049872.2_261 [gene=arn.4] [protein=Arn.4 conserved hypothetical protein] [protein_id=NP_049872.2] [location=complement(162627..162833)]	54.386	83	77.941	99
>lcl|NC_000866.4_cds_NP_049873.1_262 [gene=motA] [protein=MotA activator of middle period transcription] [protein_id=NP_049873.1] [location=complement(162967..163602)]	67.188	30	50.725	96
>lcl|NC_000866.4_cds_NP_049874.1_263 [gene=motA.1] [protein=MotA.1 hypothetical predicted periplasmic protein] [protein_id=NP_049874.1] [location=complement(163730..163879)]	91.489	94	0	0
>lcl|NC_000866.4_cds_NP_049875.1_264 [gene=52] [protein=DNA topisomerase II medium subunit] [protein_id=NP_049875.1] [location=complement(163876..165204)]	35.177	99	88.662	99
>lcl|NC_000866.4_cds_NP_049876.1_265 [gene=52.1] [protein=gp52.1 conserved hypothetical predicted membrane protein] [protein_id=NP_049876.1] [location=complement(165209..165349)]	95.652	49	95.652	49
>lcl|NC_000866.4_cds_NP_049877.1_266 [gene=ac] [protein=Ac acridine resistance protein] [protein_id=NP_049877.1] [location=complement(165342..165497)]	94.118	98	0	0
>lcl|NC_000866.4_cds_NP_049878.1_267 [gene=stp] [protein=Stp activator of host PrrC lysyl-tRNA endonuclease] [protein_id=NP_049878.1] [location=complement(165505..165585)]	79.167	89	79.167	89
>lcl|NC_000866.4_cds_NP_049879.1_268 [gene=ndd] [protein=Ndd nucleoid disruption protein] [protein_id=NP_049879.1] [location=complement(165585..166040)]	28.378	96	61.745	98
>lcl|NC_000866.4_cds_NP_049880.1_269 [gene=ndd.1] [protein=Ndd.1 conserved hypothetical protein] [protein_id=NP_049880.1] [location=complement(166101..166316)]	44.615	90	51.429	97
>lcl|NC_000866.4_cds_NP_049881.1_270 [gene=ndd.2] [protein=Ndd.2 hypothetical predicted outer membrane protein] [protein_id=NP_049881.1] [location=complement(166325..166435)]	91.429	95	0	0
>lcl|NC_000866.4_cds_NP_049882.1_271 [gene=ndd.2a] [protein=Ndd.2a hypothetical predicted periplasmic protein] [protein_id=NP_049882.1] [location=complement(166432..166554)]	95	98	0	0
>lcl|NC_000866.4_cds_NP_049883.1_272 [gene=ndd.3] [protein=Ndd.3 hypothetical predicted inner membrane protein] [protein_id=NP_049883.1] [location=complement(166548..166628)]	92.308	96	0	0
>lcl|NC_000866.4_cds_NP_049884.1_273 [gene=ndd.4] [protein=Ndd.4 hypothetical predicted inner membrane] [protein_id=NP_049884.1] [location=complement(166636..166764)]	58.333	84	61.111	84
>lcl|NC_000866.4_cds_NP_049885.1_274 [gene=ndd.5] [protein=Ndd.5 hypothetical predicted outer membrane protein] [protein_id=NP_049885.1] [location=complement(166815..166913)]	95.238	64	0	0
>lcl|NC_000866.4_cds_NP_049886.1_275 [gene=ndd.6] [protein=Ndd.6 conserved hypothetical predicted outer membrane protein] [protein_id=NP_049886.1] [location=complement(166910..166996)]	96.429	97	0	0
>lcl|NC_000866.4_cds_NP_049887.1_276 [gene=denB] [protein=DenB DNA endonuclease IV] [protein_id=NP_049887.1] [location=complement(167103..167660)]	95.238	11	72.674	92
>lcl|NC_000866.4_cds_NP_049888.1_277 [gene=denB.1] [protein=DenB.1 hypothetical protein] [protein_id=NP_049888.1] [location=complement(167743..167937)]	48.438	98	56.25	98
>lcl|NC_000866.4_cds_NP_049889.1_278 [gene=rIIB] [protein=rIIB protector from prophage-induced early lysis] [protein_id=NP_049889.1] [location=complement(167965..168903)]	100	15	64.669	99
NC_015296
>lcl|NC_015296.1_cds_YP_004327372.1_1 [gene=rIIA] [protein=RIIA protector from prophage-induced early lysis] [protein_id=YP_004327372.1] [location=1..2742]	54.348	99	54.783	99
>lcl|NC_015296.1_cds_YP_004327373.1_2 [gene=rIIB] [protein=RIIB Protector from prophage-induced early lysis] [protein_id=YP_004327373.1] [location=2775..4358]	67.932	99	68.311	99
>lcl|NC_015296.1_cds_YP_004327374.1_3 [gene=Vi01_003] [protein=putative uncharacterised protein] [protein_id=YP_004327374.1] [location=4412..4711]	88.462	26	80.412	97
>lcl|NC_015296.1_cds_YP_004327375.1_4 [gene=Vi01_004] [protein=putative uncharacterised protein] [protein_id=YP_004327375.1] [location=4686..5099]	65.248	99	65.957	99
>lcl|NC_015296.1_cds_YP_004327376.1_5 [gene=Vi01_005] [protein=hypothetical protein] [protein_id=YP_004327376.1] [location=5132..5524]	100	32	84.615	99
>lcl|NC_015296.1_cds_YP_004327377.1_6 [gene=putative tail] [protein=putative tail fibre] [protein_id=YP_004327377.1] [location=5503..6312]	85.13	99	85.13	99
>lcl|NC_015296.1_cds_YP_004327378.1_7 [gene=Vi01_007] [protein=putative uncharacterised protein] [protein_id=YP_004327378.1] [location=6316..6537]	77.922	99	79.221	99
>lcl|NC_015296.1_cds_YP_004327379.1_8 [gene=Vi01_008] [protein=putative uncharacterised protein] [protein_id=YP_004327379.1] [location=6626..7129]	62.252	90	63.473	99
>lcl|NC_015296.1_cds_YP_004327380.1_9 [gene=Vi01_009] [protein=putative uncharacterised protein] [protein_id=YP_004327380.1] [location=7177..7368]	37.037	84	37.037	84
>lcl|NC_015296.1_cds_YP_004327381.1_10 [gene=Vi01_010] [protein=putative uncharacterised protein] [protein_id=YP_004327381.1] [location=7409..7894]	59.259	67	60.759	97
>lcl|NC_015296.1_cds_YP_004327382.1_11 [gene=Vi01_011] [protein=putative uncharacterised protein] [protein_id=YP_004327382.1] [location=7891..8469]	48.731	99	48.731	99
>lcl|NC_015296.1_cds_YP_004327383.1_12 [gene=Topoisomerase IIL] [protein=DNA topoisomerase 2] [protein_id=YP_004327383.1] [location=8517..10427]	95.652	4	90.679	99
>lcl|NC_015296.1_cds_YP_004327384.1_13 [gene=Topoisomerase IIM] [protein=hypothetical protein] [protein_id=YP_004327384.1] [location=10357..11760]	86.364	5	88.262	95
>lcl|NC_015296.1_cds_YP_004327385.1_14 [gene=Vi01_014] [protein=putative uncharacterised protein] [protein_id=YP_004327385.1] [location=11803..12081]	59.14	96	59.14	96
>lcl|NC_015296.1_cds_YP_004327386.1_15 [gene=Vi01_015] [protein=conserved uncharacterised protein] [protein_id=YP_004327386.1] [location=12128..12541]	70.29	99	36.937	77
>lcl|NC_015296.1_cds_YP_004327387.1_16 [gene=Vi01_016] [protein=putative uncharacterised protein] [protein_id=YP_004327387.1] [location=12590..12814]	95.946	99	0	0
>lcl|NC_015296.1_cds_YP_004327388.1_17 [gene=Vi01_017] [protein=putative uncharacterised protein] [protein_id=YP_004327388.1] [location=12811..13047]	47.5	99	0	0
>lcl|NC_015296.1_cds_YP_004327389.1_18 [gene=Vi01_018] [protein=conserved uncharacterised protein] [protein_id=YP_004327389.1] [location=13044..13649]	73.936	93	40	68
>lcl|NC_015296.1_cds_YP_004327390.1_19 [gene=Vi01_019] [protein=putative uncharacterised protein] [protein_id=YP_004327390.1] [location=13646..13990]	93.86	99	0	0
>lcl|NC_015296.1_cds_YP_004327391.1_20 [gene=dexA-exonuclease] [protein=DexA exonuclease A?] [protein_id=YP_004327391.1] [location=13983..14615]	94.146	97	27.451	92
>lcl|NC_015296.1_cds_YP_004327392.1_21 [gene=Vi01_021] [protein=putative uncharacterised protein] [protein_id=YP_004327392.1] [location=14690..14980]	65.625	99	0	0
>lcl|NC_015296.1_cds_YP_004327393.1_22 [gene=Vi01_022] [protein=putative uncharacterised protein] [protein_id=YP_004327393.1] [location=15079..15375]	98.969	98	0	0
>lcl|NC_015296.1_cds_YP_004327394.1_23 [gene=Vi01_023] [protein=putative uncharacterised protein] [protein_id=YP_004327394.1] [location=15375..16037]	90.455	99	0	0
>lcl|NC_015296.1_cds_YP_004327395.1_24 [gene=Vi01_024] [protein=putative uncharacterised protein] [protein_id=YP_004327395.1] [location=16051..16392]	91.15	99	0	0
>lcl|NC_015296.1_cds_YP_004327396.1_25 [gene=Vi01_025] [protein=putative uncharacterised protein] [protein_id=YP_004327396.1] [location=16392..16841]	60.811	99	0	0
>lcl|NC_015296.1_cds_YP_004327397.1_26 [gene=Vi01_026] [protein=putative uncharacterised protein] [protein_id=YP_004327397.1] [location=16841..17401]	93.011	99	26.966	93
>lcl|NC_015296.1_cds_YP_004327398.1_27 [gene=Vi01_027] [protein=putative uncharacterised protein] [protein_id=YP_004327398.1] [location=17398..17730]	90.909	99	0	0
>lcl|NC_015296.1_cds_YP_004327399.1_28 [gene=Vi01_028] [protein=putative uncharacterised protein] [protein_id=YP_004327399.1] [location=17727..18077]	69.027	97	71.681	97
>lcl|NC_015296.1_cds_YP_004327400.1_29 [gene=Vi01_029] [protein=putative uncharacterised protein] [protein_id=YP_004327400.1] [location=18140..18457]	64.423	98	66.346	98
>lcl|NC_015296.1_cds_YP_004327401.1_30 [gene=dCMP deaminase] [protein=conserved uncharacterised protein] [protein_id=YP_004327401.1] [location=18457..18978]	62.353	98	64.706	98
>lcl|NC_015296.1_cds_YP_004327402.1_31 [gene=Vi01_031] [protein=conserved uncharacterised protein] [protein_id=YP_004327402.1] [location=18980..19387]	84.444	99	84.444	99
>lcl|NC_015296.1_cds_YP_004327403.1_32 [gene=Vi01_032] [protein=conserved uncharacterised protein] [protein_id=YP_004327403.1] [location=19388..19606]	68.116	95	43.939	90
>lcl|NC_015296.1_cds_YP_004327404.1_33 [gene=head completion] [protein=Gp4 head completion protein] [protein_id=YP_004327404.1] [location=complement(19598..20218)]	73.301	99	73.301	99
>lcl|NC_015296.1_cds_YP_004327405.1_34 [gene=baseplate/tail] [protein=Gp48 T4-like baseplate tail tube cap] [protein_id=YP_004327405.1] [location=20271..21239]	93.789	99	94.099	99
>lcl|NC_015296.1_cds_YP_004327406.1_35 [gene=baseplate/wedge] [protein=Gp53 baseplate wedge subunit] [protein_id=YP_004327406.1] [location=21252..21809]	79.459	99	79.459	99
>lcl|NC_015296.1_cds_YP_004327407.1_36 [gene=Vi01_036] [protein=conserved phage associated protein] [protein_id=YP_004327407.1] [location=21806..23194]	85.281	99	86.147	99
>lcl|NC_015296.1_cds_YP_004327408.1_37 [gene=Vi01_037] [protein=phage associated protein] [protein_id=YP_004327408.1] [location=23205..25145]	57.562	98	57.87	98
>lcl|NC_015296.1_cds_YP_004327409.1_38 [gene=helicase] [protein=Gp59 Loader of T4-like helicase] [protein_id=YP_004327409.1] [location=complement(25146..25808)]	77.727	99	78.44	99
>lcl|NC_015296.1_cds_YP_004327410.1_39 [gene=Vi01_039c] [protein=putative uncharacterised protein] [protein_id=YP_004327410.1] [location=complement(25798..25962)]	87.179	71	0	0
>lcl|NC_015296.1_cds_YP_004327411.1_40 [gene=Vi01_040c] [protein=putative uncharacterised protein] [protein_id=YP_004327411.1] [location=complement(25952..26215)]	42.254	81	42.254	81
>lcl|NC_015296.1_cds_YP_004327412.1_41 [gene=Vi01_041c] [protein=putative uncharacterised protein] [protein_id=YP_004327412.1] [location=complement(26298..26513)]	30.488	96	42.029	96
>lcl|NC_015296.1_cds_YP_004327413.1_42 [gene=Vi01_042c] [protein=putative uncharacterised protein] [protein_id=YP_004327413.1] [location=complement(26510..26719)]	82.258	89	0	0
>lcl|NC_015296.1_cds_YP_004327414.1_43 [gene=DNA ligase] [protein=Gp30 DNA ligase] [protein_id=YP_004327414.1] [location=complement(26716..28143)]	80.591	99	81.646	99
>lcl|NC_015296.1_cds_YP_004327415.1_44 [gene=Vi01_044c] [protein=putative uncharacterised protein] [protein_id=YP_004327415.1] [location=complement(28197..28364)]	100	98	0	0
>lcl|NC_015296.1_cds_YP_004327416.1_45 [gene=Vi01_045c] [protein=putative uncharacterised protein] [protein_id=YP_004327416.1] [location=complement(28361..28948)]	32.828	98	0	0
>lcl|NC_015296.1_cds_YP_004327417.1_46 [gene=Vi01_046c] [protein=conserved uncharacterized protein] [protein_id=YP_004327417.1] [location=complement(28985..29593)]	81.683	99	26.154	96
>lcl|NC_015296.1_cds_YP_004327418.1_47 [gene=Vi01_047c] [protein=putative uncharacterised protein] [protein_id=YP_004327418.1] [location=complement(29609..29950)]	84.071	99	0	0
>lcl|NC_015296.1_cds_YP_004327419.1_48 [gene=Vi01_048c] [protein=putative uncharacterised protein] [protein_id=YP_004327419.1] [location=complement(30006..30353)]	70.175	98	0	0
>lcl|NC_015296.1_cds_YP_004327420.1_49 [gene=Vi01_049c] [protein=putative uncharacterised protein] [protein_id=YP_004327420.1] [location=complement(30355..30567)]	80	96	74.286	96
>lcl|NC_015296.1_cds_YP_004327421.1_50 [gene=Vi01_050c] [protein=putative uncharacterised protein] [protein_id=YP_004327421.1] [location=complement(30567..30683)]	84.211	97	84.211	97
>lcl|NC_015296.1_cds_YP_004327422.1_51 [gene=Vi01_051c] [protein=conserved uncharacterised protein] [protein_id=YP_004327422.1] [location=complement(30680..31873)]	70.603	99	71.357	99
>lcl|NC_015296.1_cds_YP_004327423.1_52 [gene=Vi01_052c] [protein=putative uncharacterised protein] [protein_id=YP_004327423.1] [location=complement(31991..32302)]	78.889	87	78.889	87
>lcl|NC_015296.1_cds_YP_004327424.1_53 [gene=Vi01_053c] [protein=putative uncharacterised protein] [protein_id=YP_004327424.1] [location=complement(32315..32647)]	48.113	94	48.113	94
>lcl|NC_015296.1_cds_YP_004327425.1_54 [gene=primase-helicase] [protein=Gp41 DNA primase-helicase subunit] [protein_id=YP_004327425.1] [location=complement(32711..34141)]	88.421	99	89.684	99
>lcl|NC_015296.1_cds_YP_004327426.1_55 [gene=Vi01_055c] [protein=putative uncharacterised protein] [protein_id=YP_004327426.1] [location=complement(34142..34471)]	69.725	99	73.394	99
>lcl|NC_015296.1_cds_YP_004327427.1_56 [gene=uvsX-DNA repair] [protein=UvsX RecA-like recombination protein] [protein_id=YP_004327427.1] [location=complement(34449..35540)]	67.769	99	68.32	99
>lcl|NC_015296.1_cds_YP_004327428.1_57 [gene=Vi01_057c] [protein=putative uncharacterised protein] [protein_id=YP_004327428.1] [location=complement(35525..36055)]	55.556	99	57.222	99
>lcl|NC_015296.1_cds_YP_004327429.1_58 [gene=dUTPase] [protein=2-Deoxyuridine 5-triphosphate nucleotidohydrolase (dUTPase)] [protein_id=YP_004327429.1] [location=complement(36055..36600)]	62.366	99	63.441	99
>lcl|NC_015296.1_cds_YP_004327430.1_59 [gene=dnk] [protein=putative uncharacterised protein] [protein_id=YP_004327430.1] [location=complement(36597..37166)]	90.476	99	90.476	99
>lcl|NC_015296.1_cds_YP_004327431.1_60 [gene=thyA] [protein=Thymidylate synthase] [protein_id=YP_004327431.1] [location=complement(37163..38203)]	75.66	98	75.66	98
>lcl|NC_015296.1_cds_YP_004327432.1_61 [gene=Vi01_061c] [protein=putative uncharacterised protein] [protein_id=YP_004327432.1] [location=complement(38203..38865)]	85.455	99	85.455	99
>lcl|NC_015296.1_cds_YP_004327433.1_62 [gene=Vi01_062c] [protein=putative uncharacterised protein] [protein_id=YP_004327433.1] [location=complement(38938..39897)]	53.846	97	53.846	97
>lcl|NC_015296.1_cds_YP_004327434.1_63 [gene=Vi01_063c] [protein=putative uncharacterised protein] [protein_id=YP_004327434.1] [location=complement(40071..40358)]	63.158	99	0	0
>lcl|NC_015296.1_cds_YP_004327435.1_64 [gene=Vi01_064c] [protein=putative uncharacterised protein] [protein_id=YP_004327435.1] [location=complement(40376..41107)]	29.365	99	30.709	99
>lcl|NC_015296.1_cds_YP_004327436.1_65 [gene=DNA end protector] [protein=Gp2 DNA end protector protein] [protein_id=YP_004327436.1] [location=complement(41170..41874)]	85.106	20	92.672	99
>lcl|NC_015296.1_cds_YP_004327437.1_66 [gene=baseplate tail tube] [protein=Gp54-baseplate tail tube] [protein_id=YP_004327437.1] [location=41929..42873]	88.782	99	88.782	99
>lcl|NC_015296.1_cds_YP_004327438.1_67 [gene=ssb] [protein=Gp32 single-strand DNA binding protein] [protein_id=YP_004327438.1] [location=complement(42901..43938)]	71.552	99	71.552	99
>lcl|NC_015296.1_cds_YP_004327439.1_68 [gene=Vi01_068c] [protein=putative uncharacterised protein] [protein_id=YP_004327439.1] [location=complement(44034..44273)]	67.089	99	67.089	99
>lcl|NC_015296.1_cds_YP_004327440.1_69 [gene=late promoter] [protein=Gp33 late promoter transcription factor] [protein_id=YP_004327440.1] [location=complement(44283..44525)]	69.231	96	69.231	96
>lcl|NC_015296.1_cds_YP_004327441.1_70 [gene=FmdB family-regulator] [protein=Regulatory protein	FmdB family] [protein_id=YP_004327441.1] [location=complement(44518..44763)]	86.364	27	72.84	99
>lcl|NC_015296.1_cds_YP_004327442.1_71 [gene=Vi01_071c] [protein=putative uncharacterised protein] [protein_id=YP_004327442.1] [location=complement(44750..45046)]	100	40	45.631	99
>lcl|NC_015296.1_cds_YP_004327443.1_72 [gene=Vi01_072c] [protein=putative uncharacterised protein] [protein_id=YP_004327443.1] [location=complement(45039..45650)]	80.5	98	80.5	98
>lcl|NC_015296.1_cds_YP_004327444.1_73 [gene=Vi01_073c] [protein=putative uncharacterised protein] [protein_id=YP_004327444.1] [location=complement(45688..46173)]	46.203	98	46.203	98
>lcl|NC_015296.1_cds_YP_004327445.1_74 [gene=Vi01_074c] [protein=putative uncharacterised protein] [protein_id=YP_004327445.1] [location=complement(46151..46675)]	100	17	61.404	98
>lcl|NC_015296.1_cds_YP_004327446.1_75 [gene=base plate hub] [protein=Gp26 base plate hub subunit] [protein_id=YP_004327446.1] [location=46725..47528]	65.596	81	67.164	99
>lcl|NC_015296.1_cds_YP_004327447.1_76 [gene=tail asssociated lysozyme] [protein=Gp5-tail associated lysozyme] [protein_id=YP_004327447.1] [location=48036..49661]	83.209	99	83.769	99
>lcl|NC_015296.1_cds_YP_004327448.1_77 [gene=baseplate/wedge] [protein=Gp25 base plate wedge protein] [protein_id=YP_004327448.1] [location=49726..50106]	85.714	99	85.714	99
>lcl|NC_015296.1_cds_YP_004327449.1_78 [gene=Vi01_078c] [protein=putative uncharacterised protein] [protein_id=YP_004327449.1] [location=complement(50107..50445)]	38.202	74	0	0
>lcl|NC_015296.1_cds_YP_004327450.1_79 [gene=Vi01_079c] [protein=putative uncharacterised protein] [protein_id=YP_004327450.1] [location=complement(50447..50848)]	68.939	99	68.939	99
>lcl|NC_015296.1_cds_YP_004327451.1_80 [gene=Vi01_080c] [protein=putative uncharacterised protein] [protein_id=YP_004327451.1] [location=complement(50909..51142)]	100	99	0	0
>lcl|NC_015296.1_cds_YP_004327452.1_81 [gene=grxA-glutaredoxin] [protein=Glutaredoxin] [protein_id=YP_004327452.1] [location=complement(51249..51473)]	86.486	99	86.486	99
>lcl|NC_015296.1_cds_YP_004327453.1_82 [gene=nrdB] [protein=Ribonucleotide-diphosphate reductase beta subunit] [protein_id=YP_004327453.1] [location=complement(51483..52586)]	89.101	99	90.191	99
>lcl|NC_015296.1_cds_YP_004327454.1_83 [gene=Vi01_083c] [protein=putative uncharacterised protein] [protein_id=YP_004327454.1] [location=complement(52594..52881)]	50.575	89	50.575	89
>lcl|NC_015296.1_cds_YP_004327455.1_84 [gene=nrdA] [protein=Ribonucleoside-diphosphate reductase 1 subunit alpha] [protein_id=YP_004327455.1] [location=complement(52953..55229)]	87.755	58	83.459	52
>lcl|NC_015296.1_cds_YP_004327456.1_85 [gene=probable phoH] [protein=PhoH-like phosphate starvation-inducible protein] [protein_id=YP_004327456.1] [location=complement(55314..56153)]	88.214	99	88.929	99
>lcl|NC_015296.1_cds_YP_004327457.1_86 [gene=phage-peptidoglycan binding] [protein=phage-encoded peptidoglycan binding protein] [protein_id=YP_004327457.1] [location=complement(56259..57053)]	84.791	99	98.485	99
>lcl|NC_015296.1_cds_YP_004327458.1_87 [gene=Vi01_087c] [protein=putative uncharacterised protein] [protein_id=YP_004327458.1] [location=complement(57124..57429)]	62.376	99	62.376	99
>lcl|NC_015296.1_cds_YP_004327459.1_88 [gene=Vi01_088c] [protein=conserved uncharacterized protein] [protein_id=YP_004327459.1] [location=complement(57426..57614)]	72.581	98	74.194	98
>lcl|NC_015296.1_cds_YP_004327460.1_89 [gene=Vi01_089c] [protein=putative uncharacterised protein] [protein_id=YP_004327460.1] [location=complement(57669..58157)]	92.593	99	92.593	99
>lcl|NC_015296.1_cds_YP_004327461.1_90 [gene=DNA primase] [protein=Gp61 DNA primase subunit] [protein_id=YP_004327461.1] [location=complement(58369..59433)]	100	17	76.655	81
>lcl|NC_015296.1_cds_YP_004327462.1_91 [gene=Vi01_091c] [protein=conserved uncharacterised protein] [protein_id=YP_004327462.1] [location=complement(59433..60050)]	76.214	99	76.214	99
>lcl|NC_015296.1_cds_YP_004327463.1_92 [gene=Vi01_092c] [protein=conserved phage associated protein] [protein_id=YP_004327463.1] [location=complement(60113..60466)]	91.453	99	91.453	99
>lcl|NC_015296.1_cds_YP_004327464.1_93 [gene=Vi01_093c] [protein=phage associated protein] [protein_id=YP_004327464.1] [location=complement(60527..61099)]	85.849	55	83.598	99
>lcl|NC_015296.1_cds_YP_004327465.1_94 [gene=Vi01_094c] [protein=phage associated protein] [protein_id=YP_004327465.1] [location=complement(61147..63546)]	84.615	13	79.724	27
>lcl|NC_015296.1_cds_YP_004327466.1_95 [gene=Vi01_095c] [protein=putative uncharacterised protein] [protein_id=YP_004327466.1] [location=complement(63624..63899)]	84.615	99	0	0
>lcl|NC_015296.1_cds_YP_004327467.1_96 [gene=Vi01_096c] [protein=phage associated protein] [protein_id=YP_004327467.1] [location=complement(64004..64642)]	83.962	99	85.377	99
>lcl|NC_015296.1_cds_YP_004327468.1_97 [gene=Vi01_097c] [protein=conserved uncharacterised protein] [protein_id=YP_004327468.1] [location=complement(64642..65259)]	90.625	16	81.951	99
>lcl|NC_015296.1_cds_YP_004327469.1_98 [gene=Vi01_098c] [protein=putative uncharacterised protein] [protein_id=YP_004327469.1] [location=complement(65356..65553)]	50	94	83.077	98
>lcl|NC_015296.1_cds_YP_004327470.1_99 [gene=nrdA.1] [protein=NrdA.1] [protein_id=YP_004327470.1] [location=complement(65621..65950)]	90.278	65	90.278	65
>lcl|NC_015296.1_cds_YP_004327471.1_100 [gene=Vi01_100c] [protein=putative uncharacterised protein] [protein_id=YP_004327471.1] [location=complement(65947..66255)]	47.059	99	0	0
>lcl|NC_015296.1_cds_YP_004327472.1_101 [gene=recombination endonuclease 2] [protein=Gp46 recombination endonuclease subunit] [protein_id=YP_004327472.1] [location=complement(66258..68591)]	72	99	72	99
>lcl|NC_015296.1_cds_YP_004327473.1_102 [gene=recombination endonuclease 1] [protein=Gp47 recombination protein subunit] [protein_id=YP_004327473.1] [location=complement(68594..69709)]	90.027	99	91.105	99
>lcl|NC_015296.1_cds_YP_004327474.1_103 [gene=transcription sigma factor] [protein=Gp55 sigma factor for late transcription] [protein_id=YP_004327474.1] [location=complement(69696..70466)]	76.569	93	76.569	93
>lcl|NC_015296.1_cds_YP_004327475.1_104 [gene=rnhA-ribonuclease H] [protein=ribonuclease H] [protein_id=YP_004327475.1] [location=complement(70478..71005)]	68.966	82	68.571	99
>lcl|NC_015296.1_cds_YP_004327476.1_105 [gene=Vi01_105] [protein=conserved phage associated protein] [protein_id=YP_004327476.1] [location=71048..71815]	83.137	99	83.137	99
>lcl|NC_015296.1_cds_YP_004327477.1_106 [gene=ATP-dependent helicase] [protein=ATP-dependent helicase] [protein_id=YP_004327477.1] [location=complement(71812..73533)]	84.119	99	84.119	99
>lcl|NC_015296.1_cds_YP_004327478.1_107 [gene=DNA binding protein] [protein=DNA binding protein] [protein_id=YP_004327478.1] [location=complement(73659..73937)]	81.522	99	81.522	99
>lcl|NC_015296.1_cds_YP_004327479.1_108 [gene=Vi01_108c] [protein=conserved uncharacterised protein] [protein_id=YP_004327479.1] [location=complement(74021..74812)]	94.615	98	0	0
>lcl|NC_015296.1_cds_YP_004327480.1_109 [gene=Vi01_109c] [protein=putative uncharacterised protein] [protein_id=YP_004327480.1] [location=complement(74812..75021)]	98.551	99	0	0
>lcl|NC_015296.1_cds_YP_004327481.1_110 [gene=Vi01_110c] [protein=conserved uncharacterised protein] [protein_id=YP_004327481.1] [location=complement(75018..75326)]	98.039	99	44.444	50
>lcl|NC_015296.1_cds_YP_004327482.1_111 [gene=superinfection exclusion] [protein=Superinfection exclusion protein] [protein_id=YP_004327482.1] [location=complement(75323..75643)]	91.509	99	54.639	87
>lcl|NC_015296.1_cds_YP_004327483.1_112 [gene=Vi01_112c] [protein=phage associated protein] [protein_id=YP_004327483.1] [location=complement(75633..75920)]	55.556	94	51.282	41
>lcl|NC_015296.1_cds_YP_004327484.1_113 [gene=impD] [protein=putative uncharacterised protein] [protein_id=YP_004327484.1] [location=complement(75922..76593)]	73.171	18	73.171	18
>lcl|NC_015296.1_cds_YP_004327485.1_114 [gene=Vi01_114c] [protein=putative uncharacterised protein] [protein_id=YP_004327485.1] [location=complement(76651..77613)]	55.14	99	55.14	99
>lcl|NC_015296.1_cds_YP_004327486.1_115 [gene=Vi01_115c] [protein=putative uncharacterised protein] [protein_id=YP_004327486.1] [location=complement(77664..77984)]	75.862	81	75.862	81
>lcl|NC_015296.1_cds_YP_004327487.1_116 [gene=Vi01_116c] [protein=putative uncharacterised protein] [protein_id=YP_004327487.1] [location=complement(77981..78670)]	92.544	99	92.544	99
>lcl|NC_015296.1_cds_YP_004327488.1_117 [gene=Vi01_117c] [protein=phage assiociated protein] [protein_id=YP_004327488.1] [location=complement(78750..79199)]	83.108	99	83.108	99
>lcl|NC_015296.1_cds_YP_004327489.1_118 [gene=Vi01_118c] [protein=putative uncharacterised protein] [protein_id=YP_004327489.1] [location=complement(79237..79515)]	53.846	98	0	0
>lcl|NC_015296.1_cds_YP_004327490.1_119 [gene=Vi01_119c] [protein=pyrimidine dimer DNA glycosylase] [protein_id=YP_004327490.1] [location=complement(79528..79983)]	94.04	99	96.026	99
>lcl|NC_015296.1_cds_YP_004327491.1_120 [gene=Vi01_120c] [protein=conserved uncharacterised protein] [protein_id=YP_004327491.1] [location=complement(80044..80283)]	92.537	84	89.873	99
>lcl|NC_015296.1_cds_YP_004327492.1_121 [gene=Vi01_121c] [protein=putative uncharacterised protein] [protein_id=YP_004327492.1] [location=complement(80283..80522)]	98.734	99	0	0
>lcl|NC_015296.1_cds_YP_004327493.1_122 [gene=Vi01_122c] [protein=acyl carrier protein] [protein_id=YP_004327493.1] [location=complement(80640..80957)]	58.182	97	59.813	97
>lcl|NC_015296.1_cds_YP_004327494.1_123 [gene=Vi01_123c] [protein=putative uncharacterised protein] [protein_id=YP_004327494.1] [location=complement(80996..83212)]	82.791	99	83.762	99
>lcl|NC_015296.1_cds_YP_004327495.1_124 [gene=Vi01_124c] [protein=conserved uncharacterised protein] [protein_id=YP_004327495.1] [location=complement(83480..84205)]	74.51	42	74.51	42
>lcl|NC_015296.1_cds_YP_004327496.1_125 [gene=Putative dnaJ] [protein=putative uncharacterised protein] [protein_id=YP_004327496.1] [location=complement(84198..84404)]	80.882	99	0	0
>lcl|NC_015296.1_cds_YP_004327497.1_126 [gene=Vi01_126c] [protein=conserved uncharacterised protein] [protein_id=YP_004327497.1] [location=complement(84421..84831)]	85.366	90	48.78	87
>lcl|NC_015296.1_cds_YP_004327498.1_127 [gene=Vi01_127c] [protein=conserved uncharacterised protein] [protein_id=YP_004327498.1] [location=complement(84891..85262)]	75.926	87	75.926	87
>lcl|NC_015296.1_cds_YP_004327499.1_128 [gene=Vi01_128c] [protein=conserved uncharacterised protein] [protein_id=YP_004327499.1] [location=complement(85300..85851)]	75.956	99	75.956	99
>lcl|NC_015296.1_cds_YP_004327500.1_129 [gene=Vi01_129c] [protein=conserved uncharacterised protein] [protein_id=YP_004327500.1] [location=complement(85844..87319)]	55.556	11	75.052	98
>lcl|NC_015296.1_cds_YP_004327501.1_130 [gene=Vi01_130c] [protein=conserved uncharacterised protein] [protein_id=YP_004327501.1] [location=complement(87432..88655)]	78.025	99	81.235	99
>lcl|NC_015296.1_cds_YP_004327502.1_131 [gene=Vi01_131c] [protein=conserved uncharacterised protein] [protein_id=YP_004327502.1] [location=complement(88725..89588)]	59.589	99	64.828	99
>lcl|NC_015296.1_cds_YP_004327503.1_132 [gene=regA-translational repressor] [protein=putative uncharacterised protein] [protein_id=YP_004327503.1] [location=complement(89605..90069)]	73.913	15	88.312	99
>lcl|NC_015296.1_cds_YP_004327504.1_133 [gene=clamp loader for DNA pol.] [protein=clamp holder for DNA polymerase] [protein_id=YP_004327504.1] [location=complement(90099..90521)]	76.429	99	78.571	99
>lcl|NC_015296.1_cds_YP_004327505.1_134 [gene=sliding clamp holder] [protein=Gp44-sliding clamp holder] [protein_id=YP_004327505.1] [location=complement(90526..91515)]	82.371	99	82.979	99
>lcl|NC_015296.1_cds_YP_004327506.1_135 [gene=gp45-sliding clamp holder] [protein=Gp45-sliding clmap holder] [protein_id=YP_004327506.1] [location=complement(91596..92264)]	82.432	99	82.432	99
>lcl|NC_015296.1_cds_YP_004327507.1_136 [gene=Vi01_136] [protein=putative uncharacterised protein] [protein_id=YP_004327507.1] [location=92600..92944]	43.939	57	39.516	99
>lcl|NC_015296.1_cds_YP_004327508.1_137 [gene=type III restriction enz.] [protein=putative type III restriction enzyme] [protein_id=YP_004327508.1] [location=complement(92946..94451)]	75.248	20	81.041	54
>lcl|NC_015296.1_cds_YP_004327509.1_138 [gene=Vi01_138c] [protein=conserved uncharacterised protein] [protein_id=YP_004327509.1] [location=complement(94480..95226)]	85.484	99	85.484	99
>lcl|NC_015296.1_cds_YP_004327510.1_139 [gene=uwsY-DNA repair/recomb] [protein=putative uncharacterised protein] [protein_id=YP_004327510.1] [location=complement(95226..95681)]	82.192	96	82.192	96
>lcl|NC_015296.1_cds_YP_004327511.1_140 [gene=tail completion] [protein=Gp3-tail completion] [protein_id=YP_004327511.1] [location=complement(95720..96217)]	75.926	98	75.926	98
>lcl|NC_015296.1_cds_YP_004327512.1_141 [gene=Vi01_141] [protein=putative uncharacterised protein] [protein_id=YP_004327512.1] [location=96281..96901]	65.99	95	64.39	99
>lcl|NC_015296.1_cds_YP_004327513.1_142 [gene=Vi01_142c] [protein=phage associated protein] [protein_id=YP_004327513.1] [location=complement(96903..97631)]	63.636	99	64.05	99
>lcl|NC_015296.1_cds_YP_004327514.1_143 [gene=Vi01_143c] [protein=putative uncharacterised protein] [protein_id=YP_004327514.1] [location=complement(97662..97832)]	98.214	98	0	0
>lcl|NC_015296.1_cds_YP_004327515.1_144 [gene=Vi01_144c] [protein=conserved uncharacterised protein] [protein_id=YP_004327515.1] [location=complement(97862..98284)]	75	99	75.714	99
>lcl|NC_015296.1_cds_YP_004327516.1_145 [gene=Vi01_145c] [protein=putative uncharacterised protein] [protein_id=YP_004327516.1] [location=complement(98290..98634)]	89.157	72	84.112	93
>lcl|NC_015296.1_cds_YP_004327517.1_146 [gene=Vi01_146c] [protein=putative uncharacterised protein] [protein_id=YP_004327517.1] [location=complement(98710..99147)]	37.143	68	0	0
>lcl|NC_015296.1_cds_YP_004327518.1_147 [gene=Vi01_147c] [protein=putative uncharacterised protein] [protein_id=YP_004327518.1] [location=complement(99251..99487)]	75.472	67	79.245	67
>lcl|NC_015296.1_cds_YP_004327519.1_148 [gene=Vi01_148c] [protein=putative uncharacterised protein] [protein_id=YP_004327519.1] [location=complement(99484..99858)]	95.968	99	0	0
>lcl|NC_015296.1_cds_YP_004327520.1_149 [gene=Vi01_149c] [protein=phage associated protein] [protein_id=YP_004327520.1] [location=complement(99867..100310)]	55.102	99	97.945	99
>lcl|NC_015296.1_cds_YP_004327521.1_150 [gene=Vi01_150c] [protein=putative uncharacterised protein] [protein_id=YP_004327521.1] [location=complement(100326..100574)]	48.78	48	51.22	48
>lcl|NC_015296.1_cds_YP_004327522.1_151 [gene=Vi01_151c] [protein=conserved uncharacterised protein] [protein_id=YP_004327522.1] [location=complement(100537..100731)]	44.444	69	44.444	69
>lcl|NC_015296.1_cds_YP_004327523.1_152 [gene=major capsid prot.] [protein=Gp23-Major capsid protein] [protein_id=YP_004327523.1] [location=complement(100868..102190)]	93.409	99	92.986	99
>lcl|NC_015296.1_cds_YP_004327524.1_153 [gene=core scaffold] [protein=Gp22 prohead core scaffold protein] [protein_id=YP_004327524.1] [location=complement(102282..103121)]	72.072	76	72.072	76
>lcl|NC_015296.1_cds_YP_004327525.1_154 [gene=prohead protease] [protein=Gp21 prohead protease] [protein_id=YP_004327525.1] [location=complement(103168..103836)]	90.498	99	90.498	99
>lcl|NC_015296.1_cds_YP_004327526.1_155 [gene=Vi01_155c] [protein=conserved phage assoiated protein] [protein_id=YP_004327526.1] [location=complement(103844..104161)]	88.119	95	88.119	95
>lcl|NC_015296.1_cds_YP_004327527.1_156 [gene=Vi01_156c] [protein=putative uncharacterised protein] [protein_id=YP_004327527.1] [location=complement(104170..104340)]	60.784	89	62.745	89
>lcl|NC_015296.1_cds_YP_004327528.1_157 [gene=portal vertex] [protein=Gp20 portal vertex protein of the head] [protein_id=YP_004327528.1] [location=complement(104382..106064)]	81.086	95	81.273	95
>lcl|NC_015296.1_cds_YP_004327529.1_158 [gene=tail tube protein] [protein=Gp19 tail tube protein] [protein_id=YP_004327529.1] [location=complement(106132..106665)]	93.785	99	93.785	99
>lcl|NC_015296.1_cds_YP_004327530.1_159 [gene=GIY-YIG endonuclease] [protein=GIY-YIG endonuclease] [protein_id=YP_004327530.1] [location=complement(106696..107154)]	28.319	73	38.889	70
>lcl|NC_015296.1_cds_YP_004327531.1_160 [gene=tail sheath] [protein=Gp18 tail sheath protein] [protein_id=YP_004327531.1] [location=complement(107211..109106)]	86.551	99	86.551	99
>lcl|NC_015296.1_cds_YP_004327532.1_161 [gene=large terminase] [protein=Gp17 terminase subunit for DNA packaging	nuclease and ATPase] [protein_id=YP_004327532.1] [location=complement(109159..111369)]	83.924	99	83.787	99
>lcl|NC_015296.1_cds_YP_004327533.1_162 [gene=small terminase] [protein=Gp16 terminase DNA packaging enzyme small subunit] [protein_id=YP_004327533.1] [location=complement(111350..112030)]	64.53	99	64.53	99
>lcl|NC_015296.1_cds_YP_004327534.1_163 [gene=tail connector] [protein=Gp15 proximal tail sheath stabilization] [protein_id=YP_004327534.1] [location=complement(112033..112731)]	79.741	99	80.603	99
>lcl|NC_015296.1_cds_YP_004327535.1_164 [gene=neck protein] [protein=Gp14 neck protein] [protein_id=YP_004327535.1] [location=complement(112734..113375)]	80.093	99	80.093	99
>lcl|NC_015296.1_cds_YP_004327536.1_165 [gene=Vi01_165] [protein=putative uncharacterised protein] [protein_id=YP_004327536.1] [location=113437..113649]	55.714	99	67.568	99
>lcl|NC_015296.1_cds_YP_004327537.1_166 [gene=neck protein] [protein=Gp13 neck protein] [protein_id=YP_004327537.1] [location=complement(113678..114430)]	86.8	99	86.8	99
>lcl|NC_015296.1_cds_YP_004327538.1_167 [gene=Vi01_167c] [protein=putative uncharacterised protein] [protein_id=YP_004327538.1] [location=complement(114417..114758)]	86.364	19	62.162	96
>lcl|NC_015296.1_cds_YP_004327539.1_168 [gene=Vi01_168c] [protein=putative uncharacterised protein] [protein_id=YP_004327539.1] [location=complement(114742..114990)]	63.415	99	64.179	81
>lcl|NC_015296.1_cds_YP_004327540.1_169 [gene=Vi01_169c] [protein=conserved phage associated protein] [protein_id=YP_004327540.1] [location=complement(115043..119881)]	84.243	99	84.491	99
>lcl|NC_015296.1_cds_YP_004327541.1_170 [gene=tail spike protein 1] [protein=tail spike protein] [protein_id=YP_004327541.1] [location=complement(119976..121766)]	32.653	15	78.631	99
>lcl|NC_015296.1_cds_YP_004327542.1_171 [gene=Vi maturation-adhesion tail spike] [protein=maturation/adhesion protein] [protein_id=YP_004327542.1] [location=complement(121816..124014)]	35.294	11	60.164	66
>lcl|NC_015296.1_cds_YP_004327543.1_172 [gene=tail spike 3] [protein=putative head-binding domain of phage tailspike protein] [protein_id=YP_004327543.1] [location=complement(124070..126610)]	36.62	8	66.667	19
>lcl|NC_015296.1_cds_YP_004327544.1_173 [gene=probable tail fibre] [protein=hemolysin-type calcium-binding protein] [protein_id=YP_004327544.1] [location=complement(126661..129834)]	36.905	16	61.765	41
>lcl|NC_015296.1_cds_YP_004327545.1_174 [gene=putative tail fibre] [protein=putative uncharacterised protein] [protein_id=YP_004327545.1] [location=complement(129881..131071)]	62.808	99	63.3	99
>lcl|NC_015296.1_cds_YP_004327546.1_175 [gene=Vi01_175c] [protein=phage associated protein] [protein_id=YP_004327546.1] [location=complement(131074..131928)]	83.099	99	83.099	99
>lcl|NC_015296.1_cds_YP_004327547.1_176 [gene=baseplate wedge] [protein=Gp6 baseplate wedge subunit] [protein_id=YP_004327547.1] [location=complement(131912..133693)]	77.066	99	77.066	99
>lcl|NC_015296.1_cds_YP_004327548.1_177 [gene=Vi01_177] [protein=putative uncharacterised protein] [protein_id=YP_004327548.1] [location=134057..134626]	65.789	99	67.895	99
>lcl|NC_015296.1_cds_YP_004327549.1_178 [gene=Vi01_178] [protein=putative uncharacterised protein] [protein_id=YP_004327549.1] [location=134684..134830]	87.5	98	0	0
>lcl|NC_015296.1_cds_YP_004327550.1_179 [gene=Vi01_179] [protein=phage associated protein] [protein_id=YP_004327550.1] [location=138943..139176]	76.119	85	76.119	85
>lcl|NC_015296.1_cds_YP_004327551.1_180 [gene=Vi01_180] [protein=conserved phage associated protein] [protein_id=YP_004327551.1] [location=139186..139704]	100	45	81.977	99
>lcl|NC_015296.1_cds_YP_004327552.1_181 [gene=Vi01_181] [protein=putative uncharacterised protein] [protein_id=YP_004327552.1] [location=139776..140468]	43.46	99	43.83	99
>lcl|NC_015296.1_cds_YP_004327553.1_182 [gene=Vi01_182] [protein=putative uncharacterised protein] [protein_id=YP_004327553.1] [location=140538..141812]	94.22	81	92.386	93
>lcl|NC_015296.1_cds_YP_004327554.1_183 [gene=Vi01_183] [protein=phage associated protein] [protein_id=YP_004327554.1] [location=141852..142301]	63.158	99	63.158	99
>lcl|NC_015296.1_cds_YP_004327555.1_184 [gene=Vi01_184] [protein=phage associated protein] [protein_id=YP_004327555.1] [location=142337..142792]	62.5	88	62.5	88
>lcl|NC_015296.1_cds_YP_004327556.1_185 [gene=Vi01_185c] [protein=putative uncharacterised protein] [protein_id=YP_004327556.1] [location=complement(142828..143373)]	85.43	83	85.43	83
>lcl|NC_015296.1_cds_YP_004327557.1_186 [gene=Vi01_186c] [protein=putative uncharacterised protein] [protein_id=YP_004327557.1] [location=complement(143370..143522)]	71.739	90	0	0
>lcl|NC_015296.1_cds_YP_004327558.1_187 [gene=Vi01_187c] [protein=putative uncharacterised protein] [protein_id=YP_004327558.1] [location=complement(143648..144127)]	79.839	78	0	0
>lcl|NC_015296.1_cds_YP_004327559.1_188 [gene=Vi01_188c] [protein=putative uncharacterised protein] [protein_id=YP_004327559.1] [location=complement(144223..144435)]	71.429	39	71.429	72
>lcl|NC_015296.1_cds_YP_004327560.1_189 [gene=Vi01_189c] [protein=putative uncharacterised protein] [protein_id=YP_004327560.1] [location=complement(144476..145066)]	90.526	96	90.526	96
>lcl|NC_015296.1_cds_YP_004327561.1_190 [gene=polA- DNA polymerase] [protein=Gp43 DNA polymerase] [protein_id=YP_004327561.1] [location=145128..148124]	82.09	13	87.526	47
>lcl|NC_015296.1_cds_YP_004327562.1_191 [gene=Vi01_193] [protein=putative uncharacterised protein] [protein_id=YP_004327562.1] [location=148185..148529]	90.09	97	90.09	97
>lcl|NC_015296.1_cds_YP_004327563.1_192 [gene=Vi01_194] [protein=putative uncharacterised protein] [protein_id=YP_004327563.1] [location=148522..149304]	76.245	99	76.245	99
>lcl|NC_015296.1_cds_YP_004327564.1_193 [gene=Vi01_195] [protein=putative uncharacterised protein] [protein_id=YP_004327564.1] [location=149314..149619]	69.474	93	71.717	97
>lcl|NC_015296.1_cds_YP_004327565.1_194 [gene=Vi01_196] [protein=putative uncharacterised protein] [protein_id=YP_004327565.1] [location=149619..150533]	46.885	99	47.213	99
>lcl|NC_015296.1_cds_YP_004327566.1_195 [gene=Vi01_197] [protein=putative uncharacterised protein] [protein_id=YP_004327566.1] [location=150537..150740]	29.231	96	0	0
>lcl|NC_015296.1_cds_YP_004327567.1_196 [gene=Vi01_198] [protein=putative uncharacterised protein] [protein_id=YP_004327567.1] [location=150742..151092]	57.547	91	57.547	91
>lcl|NC_015296.1_cds_YP_004327568.1_197 [gene=Vi01_199] [protein=putative uncharacterised protein] [protein_id=YP_004327568.1] [location=151076..152311]	85.372	99	88.564	99
>lcl|NC_015296.1_cds_YP_004327569.1_198 [gene=Vi01_200] [protein=putative uncharacterised protein] [protein_id=YP_004327569.1] [location=152350..152517]	89.362	84	89.362	84
>lcl|NC_015296.1_cds_YP_004327570.1_199 [gene=Vi01_201] [protein=putative uncharacterised protein] [protein_id=YP_004327570.1] [location=152598..152852]	42.857	99	0	0
>lcl|NC_015296.1_cds_YP_004327571.1_200 [gene=Vi01_202] [protein=putative uncharacterised protein] [protein_id=YP_004327571.1] [location=152849..153235]	76.087	36	76.087	36
>lcl|NC_015296.1_cds_YP_004327572.1_201 [gene=host lysis protein] [protein=conserved uncharacterised protein] [protein_id=YP_004327572.1] [location=153232..154341]	82.597	98	83.425	98
>lcl|NC_015296.1_cds_YP_004327573.1_202 [gene=Vi01_204] [protein=conserved uncharacterised protein] [protein_id=YP_004327573.1] [location=154357..154926]	84.656	99	86.243	99
>lcl|NC_015296.1_cds_YP_004327574.1_203 [gene=Vi01_205] [protein=putative uncharacterised protein] [protein_id=YP_004327574.1] [location=154930..155355]	72.727	84	71.324	94
>lcl|NC_015296.1_cds_YP_004327575.1_204 [gene=Vi01_206] [protein=putative uncharacterised protein] [protein_id=YP_004327575.1] [location=155418..155789]	53.636	88	56.364	88
>lcl|NC_015296.1_cds_YP_004327576.1_205 [gene=Vi01_207] [protein=putative uncharacterised protein] [protein_id=YP_004327576.1] [location=155786..156232]	42.384	95	43.624	95
>lcl|NC_015296.1_cds_YP_004327577.1_206 [gene=Vi01_208] [protein=putative uncharacterised protein] [protein_id=YP_004327577.1] [location=156225..156431]	55.172	42	0	0
>lcl|NC_015296.1_cds_YP_004327578.1_207 [gene=Vi01_209] [protein=putative uncharacterised protein] [protein_id=YP_004327578.1] [location=156400..156603]	58.065	91	58.065	91
>lcl|NC_015296.1_cds_YP_004327579.1_208 [gene=Vi01_210] [protein=putative uncharacterised protein] [protein_id=YP_004327579.1] [location=156600..156953]	67.826	97	67.826	97
NC_001604
>lcl|NC_001604.1_cds_NP_041954.1_1 [gene=T7p01] [protein=hypothetical protein] [protein_id=NP_041954.1] [location=925..1278]	47.458	50	57.692	66
>lcl|NC_001604.1_cds_NP_041955.1_2 [gene=T7p02] [protein=hypothetical protein] [protein_id=NP_041955.1] [location=1278..1433]	57.5	77	0	0
>lcl|NC_001604.1_cds_NP_041956.1_3 [gene=T7p04] [protein=hypothetical protein] [protein_id=NP_041956.1] [location=1496..1639]	80.952	44	0	0
>lcl|NC_001604.1_cds_NP_041957.1_4 [gene=T7p05] [protein=hypothetical protein] [protein_id=NP_041957.1] [location=join(1636..1794	1796..1972)]	93.103	26	75	32
>lcl|NC_001604.1_cds_NP_041958.1_5 [gene=T7p06] [protein=hypothetical protein] [protein_id=NP_041958.1] [location=1636..1797]	82.222	83	75	67
>lcl|NC_001604.1_cds_NP_041959.1_6 [gene=T7p03] [protein=protein kinase] [protein_id=NP_041959.1] [location=2021..3100]	83.871	9	0	0
>lcl|NC_001604.1_cds_NP_041960.1_7 [gene=T7p07] [protein=T3/T7-like RNA polymerase] [protein_id=NP_041960.1] [location=3171..5822]	83.333	3	100	99
>lcl|NC_001604.1_cds_NP_041961.1_8 [gene=T7p09] [protein=hypothetical protein] [protein_id=NP_041961.1] [location=6007..6135]	57.895	86	0	0
>lcl|NC_001604.1_cds_NP_041962.1_9 [gene=T7p08] [protein=host dGTPase inhibitor] [protein_id=NP_041962.1] [location=6137..6394]	38.571	76	54.118	99
>lcl|NC_001604.1_cds_NP_041963.1_10 [gene=T7p10] [protein=ATP-dependent DNA ligase] [protein_id=NP_041963.1] [location=6475..7554]	26.752	42	51.648	99
>lcl|NC_001604.1_cds_NP_041964.1_11 [gene=T7p11] [protein=hypothetical protein] [protein_id=NP_041964.1] [location=7608..7763]	92.157	98	0	0
>lcl|NC_001604.1_cds_NP_041965.1_12 [gene=T7p12] [protein=hypothetical protein] [protein_id=NP_041965.1] [location=7791..7880]	82.609	77	0	0
>lcl|NC_001604.1_cds_NP_041966.1_13 [gene=T7p13] [protein=hypothetical protein] [protein_id=NP_041966.1] [location=7906..8166]	100	21	34.94	95
>lcl|NC_001604.1_cds_NP_041967.1_14 [gene=T7p14] [protein=hypothetical protein] [protein_id=NP_041967.1] [location=8166..8756]	40.278	37	60.396	51
>lcl|NC_001604.1_cds_NP_041968.1_15 [gene=T7p15] [protein=hypothetical protein] [protein_id=NP_041968.1] [location=8749..8895]	44.444	59	0	0
>lcl|NC_001604.1_cds_NP_041969.1_16 [gene=T7p16] [protein=inhibitor of host bacterial RNA polymerase] [protein_id=NP_041969.1] [location=8898..9092]	39.216	78	0	0
>lcl|NC_001604.1_cds_NP_041970.1_17 [gene=T7p17] [protein=single-stranded DNA-binding protein] [protein_id=NP_041970.1] [location=9158..9856]	100	12	50.543	77
>lcl|NC_001604.1_cds_NP_041971.1_18 [gene=T7p18] [protein=hypothetical protein] [protein_id=NP_041971.1] [location=9857..10276]	50	29	38.889	79
>lcl|NC_001604.1_cds_NP_041972.1_19 [gene=T7p19] [protein=endonuclease I] [protein_id=NP_041972.1] [location=10257..10706]	40	53	65.468	91
>lcl|NC_001604.1_cds_NP_041973.1_20 [gene=T7p20] [protein=lysozyme] [protein_id=NP_041973.1] [location=10706..11161]	43.357	89	69.536	99
>lcl|NC_001604.1_cds_NP_041974.1_21 [gene=T7p21] [protein=putative NHN endonuclease] [protein_id=NP_041974.1] [location=11225..11590]	46.667	49	41.509	86
>lcl|NC_001604.1_cds_NP_041975.1_22 [gene=T7p22] [protein=DNA primase/helicase] [protein_id=NP_041975.1] [location=11565..13265]	46.835	14	63.1	95
>lcl|NC_001604.1_cds_NP_041976.1_23 [gene=T7p23] [protein=hypothetical protein] [protein_id=NP_041976.1] [location=11635..11757]	39.394	80	51.111	98
>lcl|NC_001604.1_cds_NP_041977.1_24 [gene=T7p24] [protein=helicase] [protein_id=NP_041977.1] [location=11754..13265]	46.835	15	66.109	94
>lcl|NC_001604.1_cds_NP_041978.1_25 [gene=T7p25] [protein=hypothetical protein] [protein_id=NP_041978.1] [location=12988..13326]	50	36	86.567	59
>lcl|NC_001604.1_cds_NP_041979.1_26 [gene=T7p26] [protein=hypothetical protein] [protein_id=NP_041979.1] [location=13352..13564]	39.13	97	0	0
>lcl|NC_001604.1_cds_NP_041980.1_27 [gene=T7p27] [protein=hypothetical protein] [protein_id=NP_041980.1] [location=13584..13853]	64.815	60	0	0
>lcl|NC_001604.1_cds_NP_041981.1_28 [gene=T7p28] [protein=hypothetical protein] [protein_id=NP_041981.1] [location=13927..14334]	53.247	55	0	0
>lcl|NC_001604.1_cds_NP_041982.1_29 [gene=T7p29] [protein=DNA polymerase] [protein_id=NP_041982.1] [location=14353..16467]	59.615	7	59.916	99
>lcl|NC_001604.1_cds_NP_041983.1_30 [gene=T7p30] [protein=hypothetical protein] [protein_id=NP_041983.1] [location=16483..16839]	40.187	90	35.833	98
>lcl|NC_001604.1_cds_NP_041984.1_31 [gene=T7p31] [protein=hypothetical protein] [protein_id=NP_041984.1] [location=join(16851..17147	17147..17359)]	28.409	52	76.812	41
>lcl|NC_001604.1_cds_NP_041985.1_32 [gene=T7p32] [protein=host protein H-NS-interacting protein] [protein_id=NP_041985.1] [location=16851..17150]	28.409	88	44.792	96
>lcl|NC_001604.1_cds_NP_041986.1_33 [gene=T7p33] [protein=hypothetical protein] [protein_id=NP_041986.1] [location=17150..17359]	47.619	90	76.812	99
>lcl|NC_001604.1_cds_NP_041987.1_34 [gene=T7p34] [protein=host recBCD nuclease inhibitor] [protein_id=NP_041987.1] [location=17359..17517]	56.522	43	0	0
>lcl|NC_001604.1_cds_NP_041988.1_35 [gene=T7p35] [protein=exonuclease] [protein_id=NP_041988.1] [location=17504..18406]	27.473	89	51.071	93
>lcl|NC_001604.1_cds_NP_041989.1_36 [gene=T7p36] [protein=hypothetical protein] [protein_id=NP_041989.1] [location=18394..18507]	78.378	97	0	0
>lcl|NC_001604.1_cds_NP_041990.1_37 [gene=T7p37] [protein=hypothetical protein] [protein_id=NP_041990.1] [location=18605..18859]	34.783	81	35.526	89
>lcl|NC_001604.1_cds_NP_041991.1_38 [gene=T7p38] [protein=hypothetical protein] [protein_id=NP_041991.1] [location=18864..19130]	34.483	65	45.946	83
>lcl|NC_001604.1_cds_NP_041992.1_39 [gene=T7p39] [protein=hypothetical protein] [protein_id=NP_041992.1] [location=19130..19531]	26.316	78	0	0
>lcl|NC_001604.1_cds_NP_041993.1_40 [gene=T7p40] [protein=tail assembly protein] [protein_id=NP_041993.1] [location=19535..19834]	62.791	43	0	0
>lcl|NC_001604.1_cds_NP_041994.1_41 [gene=T7p41] [protein=hypothetical protein] [protein_id=NP_041994.1] [location=19848..20240]	39.024	31	39.695	98
>lcl|NC_001604.1_cds_NP_041995.1_42 [gene=T7p42] [protein=head-tail connector protein] [protein_id=NP_041995.1] [location=20240..21850]	74.167	22	69.136	91
>lcl|NC_001604.1_cds_NP_041996.1_43 [gene=T7p43] [protein=capsid assembly protein] [protein_id=NP_041996.1] [location=21950..22873]	31.783	40	41.558	97
>lcl|NC_001604.1_cds_NP_041997.1_44 [gene=T7p44] [protein=major capsid protein] [protein_id=NP_041997.1] [location=join(22967..23989	23989..24162)]	95.238	5	70.948	81
>lcl|NC_001604.1_cds_NP_041998.1_45 [gene=T7p45] [protein=major capsid protein] [protein_id=NP_041998.1] [location=22967..24004]	70.37	8	71.385	92
>lcl|NC_001604.1_cds_NP_041999.1_46 [gene=T7p46] [protein=tail tubular protein A] [protein_id=NP_041999.1] [location=24228..24818]	90	15	61.658	98
>lcl|NC_001604.1_cds_NP_042000.1_47 [gene=T7p47] [protein=tail tubular protein B] [protein_id=NP_042000.1] [location=24842..27226]	35.714	16	52.889	99
>lcl|NC_001604.1_cds_NP_042001.1_48 [gene=T7p48] [protein=internal virion protein A] [protein_id=NP_042001.1] [location=27307..27723]	37.5	51	52.427	71
>lcl|NC_001604.1_cds_NP_042002.1_49 [gene=T7p49] [protein=internal virion protein B] [protein_id=NP_042002.1] [location=27728..28318]	38.75	41	39.024	82
>lcl|NC_001604.1_cds_NP_042003.1_50 [gene=T7p50] [protein=internal virion protein C] [protein_id=NP_042003.1] [location=28325..30568]	24.044	48	46.657	92
>lcl|NC_001604.1_cds_NP_042004.1_51 [gene=T7p51] [protein=internal virion protein D] [protein_id=NP_042004.1] [location=30595..34551]	35.78	8	53.547	88
>lcl|NC_001604.1_cds_NP_042005.1_52 [gene=T7p52] [protein=tail fiber protein] [protein_id=NP_042005.1] [location=34624..36285]	29.412	18	60.674	32
>lcl|NC_001604.1_cds_NP_042006.1_53 [gene=T7p53] [protein=type II holin] [protein_id=NP_042006.1] [location=36344..36547]	32.857	99	72.549	75
>lcl|NC_001604.1_cds_NP_042007.1_54 [gene=T7p54] [protein=DNA packaging protein	small subunit] [protein_id=NP_042007.1] [location=36553..36822]	58.824	38	53.165	88
>lcl|NC_001604.1_cds_NP_042008.1_55 [gene=T7p55] [protein=phage lambda Rz-like lysis protein] [protein_id=NP_042008.1] [location=36917..37348]	50	37	51.333	99
>lcl|NC_001604.1_cds_NP_042009.1_56 [gene=T7p56] [protein=phage lambda Rz1-like protein] [protein_id=NP_042009.1] [location=37032..37283]	40.625	71	54.444	99
>lcl|NC_001604.1_cds_NP_042010.1_57 [gene=T7p57] [protein=DNA maturation protein] [protein_id=NP_042010.1] [location=37370..39130]	41.558	13	66.431	96
>lcl|NC_001604.1_cds_NP_042011.1_58 [gene=T7p58] [protein=hypothetical protein] [protein_id=NP_042011.1] [location=38016..38273]	32.584	95	69.412	99
>lcl|NC_001604.1_cds_NP_042012.1_59 [gene=T7p59] [protein=hypothetical protein] [protein_id=NP_042012.1] [location=38553..38726]	29.688	97	57.143	97
>lcl|NC_001604.1_cds_NP_042013.1_60 [gene=T7p60] [protein=hypothetical protein] [protein_id=NP_042013.1] [location=39389..39538]	39.13	92	0	0
NC_005262
>lcl|NC_005262.3_cds_NP_944231.1_1 [gene=Bcep22_gp01] [protein=hypothetical protein] [protein_id=NP_944231.1] [location=complement(3..518)]	100	99	49.398	48
>lcl|NC_005262.3_cds_NP_944232.1_2 [gene=Bcep22_gp02] [protein=hypothetical protein] [protein_id=NP_944232.1] [location=complement(515..838)]	100	99	0	0
>lcl|NC_005262.3_cds_NP_944233.1_3 [gene=Bcep22_gp03] [protein=hypothetical protein] [protein_id=NP_944233.1] [location=complement(835..1113)]	98.913	99	0	0
>lcl|NC_005262.3_cds_YP_009173768.1_4 [gene=Bcep22_gp04] [protein=hypothetical protein] [protein_id=YP_009173768.1] [location=complement(1104..1301)]	97.826	70	0	0
>lcl|NC_005262.3_cds_NP_944234.1_5 [gene=Bcep22_gp05] [protein=hypothetical protein] [protein_id=NP_944234.1] [location=complement(1307..2299)]	33.333	59	0	0
>lcl|NC_005262.3_cds_NP_944235.2_6 [gene=Bcep22_gp06] [protein=serine recombinase-like protein] [protein_id=NP_944235.2] [location=complement(2392..4038)]	99.818	99	0	0
>lcl|NC_005262.3_cds_YP_009173769.1_7 [gene=Bcep22_gp07] [protein=hypothetical protein] [protein_id=YP_009173769.1] [location=complement(4199..4447)]	98.78	99	0	0
>lcl|NC_005262.3_cds_NP_944236.1_8 [gene=Bcep22_gp08] [protein=hypothetical protein] [protein_id=NP_944236.1] [location=complement(4518..4655)]	88.889	98	0	0
>lcl|NC_005262.3_cds_NP_944237.1_9 [gene=Bcep22_gp09] [protein=hypothetical protein] [protein_id=NP_944237.1] [location=complement(4665..5021)]	65.254	99	0	0
>lcl|NC_005262.3_cds_NP_944238.1_10 [gene=Bcep22_gp10] [protein=RecT-like protein] [protein_id=NP_944238.1] [location=complement(5018..6031)]	76.667	89	41.916	49
>lcl|NC_005262.3_cds_NP_944240.2_11 [gene=Bcep22_gp11] [protein=RecB-like endonuclease] [protein_id=NP_944240.2] [location=complement(6085..7116)]	92.128	99	29.536	67
>lcl|NC_005262.3_cds_NP_944241.1_12 [gene=Bcep22_gp13] [protein=cI-like putative transcriptional regulator] [protein_id=NP_944241.1] [location=complement(7271..7861)]	80.791	90	0	0
>lcl|NC_005262.3_cds_NP_944242.1_13 [gene=Bcep22_gp14] [protein=hypothetical protein] [protein_id=NP_944242.1] [location=7986..8342]	77.011	73	0	0
>lcl|NC_005262.3_cds_NP_944243.2_14 [gene=Bcep22_gp15] [protein=HNH endonuclease] [protein_id=NP_944243.2] [location=8451..8954]	30.709	68	31.333	85
>lcl|NC_005262.3_cds_NP_944244.2_15 [gene=Bcep22_gp16] [protein=HNH endonuclease] [protein_id=NP_944244.2] [location=9376..10140]	30.709	47	42.424	26
>lcl|NC_005262.3_cds_NP_944246.1_16 [gene=Bcep22_gp17] [protein=putative single strand DNA-binding protein] [protein_id=NP_944246.1] [location=10140..10649]	74.118	99	62.609	65
>lcl|NC_005262.3_cds_YP_009173770.1_17 [gene=Bcep22_gp18] [protein=hypothetical protein] [protein_id=YP_009173770.1] [location=10657..10875]	72.464	95	0	0
>lcl|NC_005262.3_cds_NP_944247.1_18 [gene=Bcep22_gp19] [protein=hypothetical protein] [protein_id=NP_944247.1] [location=10872..11333]	72.973	48	35.714	44
>lcl|NC_005262.3_cds_NP_944248.1_19 [gene=Bcep22_gp20] [protein=hypothetical protein] [protein_id=NP_944248.1] [location=11330..11830]	84.337	99	0	0
>lcl|NC_005262.3_cds_NP_944249.1_20 [gene=Bcep22_gp21] [protein=hypothetical protein] [protein_id=NP_944249.1] [location=11827..12102]	96.703	99	0	0
>lcl|NC_005262.3_cds_NP_944250.2_21 [gene=Bcep22_gp22] [protein=hypothetical protein] [protein_id=NP_944250.2] [location=12099..12623]	99.346	87	0	0
>lcl|NC_005262.3_cds_NP_944251.1_22 [gene=Bcep22_gp23] [protein=hypothetical protein] [protein_id=NP_944251.1] [location=12620..13087]	83.226	99	0	0
>lcl|NC_005262.3_cds_NP_944252.1_23 [gene=Bcep22_gp24] [protein=hypothetical protein] [protein_id=NP_944252.1] [location=13302..13538]	84.507	90	43.662	90
>lcl|NC_005262.3_cds_NP_944253.2_24 [gene=Bcep22_gp25] [protein=putative DNA methylase] [protein_id=NP_944253.2] [location=13535..14647]	100	99	51.654	93
>lcl|NC_005262.3_cds_NP_944256.1_25 [gene=Bcep22_gp27] [protein=putative DNA replication protein] [protein_id=NP_944256.1] [location=14644..15417]	49.143	65	33.913	78
>lcl|NC_005262.3_cds_NP_944257.1_26 [gene=Bcep22_gp28] [protein=DnaC-like protein] [protein_id=NP_944257.1] [location=15417..16214]	87.17	99	39.516	91
>lcl|NC_005262.3_cds_NP_944258.1_27 [gene=Bcep22_gp29] [protein=hypothetical protein] [protein_id=NP_944258.1] [location=16235..16408]	81.818	38	0	0
>lcl|NC_005262.3_cds_NP_944259.1_28 [gene=Bcep22_gp30] [protein=hypothetical protein] [protein_id=NP_944259.1] [location=16463..16882]	80	99	33.333	56
>lcl|NC_005262.3_cds_NP_944260.2_29 [gene=Bcep22_gp31] [protein=hypothetical protein] [protein_id=NP_944260.2] [location=16962..18191]	79.397	48	44.681	11
>lcl|NC_005262.3_cds_NP_944261.1_30 [gene=Bcep22_gp32] [protein=ISL3 family transposase] [protein_id=NP_944261.1] [location=complement(18231..19679)]	100	99	22.222	71
>lcl|NC_005262.3_cds_NP_944262.1_31 [gene=Bcep22_gp33] [protein=hypothetical protein] [protein_id=NP_944262.1] [location=complement(19683..20057)]	100	99	0	0
>lcl|NC_005262.3_cds_NP_944263.1_32 [gene=Bcep22_gp34] [protein=hypothetical protein] [protein_id=NP_944263.1] [location=complement(20079..20294)]	100	99	62.121	92
>lcl|NC_005262.3_cds_NP_944264.1_33 [gene=Bcep22_gp35] [protein=hypothetical protein] [protein_id=NP_944264.1] [location=complement(20412..20990)]	53.216	85	0	0
>lcl|NC_005262.3_cds_NP_944265.2_34 [gene=Bcep22_gp36] [protein=TerS] [protein_id=NP_944265.2] [location=21154..21933]	48.54	99	41.975	92
>lcl|NC_005262.3_cds_NP_944266.1_35 [gene=Bcep22_gp37] [protein=hypothetical protein] [protein_id=NP_944266.1] [location=22014..22478]	42.697	51	0	0
>lcl|NC_005262.3_cds_NP_944267.1_36 [gene=Bcep22_gp38] [protein=hypothetical protein] [protein_id=NP_944267.1] [location=22480..22776]	55.67	98	0	0
>lcl|NC_005262.3_cds_NP_944268.1_37 [gene=Bcep22_gp39] [protein=hypothetical protein] [protein_id=NP_944268.1] [location=22773..22985]	53.571	99	40.26	93
>lcl|NC_005262.3_cds_NP_944269.1_38 [gene=Bcep22_gp40] [protein=hypothetical protein] [protein_id=NP_944269.1] [location=22985..23191]	47.059	97	47.368	55
>lcl|NC_005262.3_cds_NP_944270.1_39 [gene=Bcep22_gp41] [protein=hypothetical protein] [protein_id=NP_944270.1] [location=23257..23451]	81.818	34	0	0
>lcl|NC_005262.3_cds_NP_944271.1_40 [gene=Bcep22_gp42] [protein=hypothetical protein] [protein_id=NP_944271.1] [location=23448..23579]	76.923	59	0	0
>lcl|NC_005262.3_cds_NP_944272.1_41 [gene=Bcep22_gp43] [protein=hypothetical protein] [protein_id=NP_944272.1] [location=23616..23765]	67.347	98	43.478	92
>lcl|NC_005262.3_cds_NP_944273.1_42 [gene=Bcep22_gp44] [protein=transcriptional regulator] [protein_id=NP_944273.1] [location=complement(23794..24012)]	90.278	99	0	0
>lcl|NC_005262.3_cds_NP_944274.1_43 [gene=Bcep22_gp45] [protein=hypothetical protein] [protein_id=NP_944274.1] [location=24093..24293]	71.014	99	0	0
>lcl|NC_005262.3_cds_NP_944275.1_44 [gene=Bcep22_gp46] [protein=hypothetical protein] [protein_id=NP_944275.1] [location=24290..24451]	72.414	54	0	0
>lcl|NC_005262.3_cds_NP_944276.1_45 [gene=Bcep22_gp47] [protein=hypothetical protein] [protein_id=NP_944276.1] [location=24448..24657]	100	99	0	0
>lcl|NC_005262.3_cds_NP_944277.1_46 [gene=Bcep22_gp48] [protein=hypothetical protein] [protein_id=NP_944277.1] [location=24654..25046]	68.224	77	54.023	66
>lcl|NC_005262.3_cds_NP_944278.1_47 [gene=Bcep22_gp49] [protein=TerL] [protein_id=NP_944278.1] [location=25095..26687]	87.382	99	58.14	94
>lcl|NC_005262.3_cds_NP_944279.1_48 [gene=Bcep22_gp50] [protein=hypothetical protein] [protein_id=NP_944279.1] [location=27046..27492]	90.345	97	0	0
>lcl|NC_005262.3_cds_NP_944280.1_49 [gene=Bcep22_gp51] [protein=phage portal protein] [protein_id=NP_944280.1] [location=27516..29846]	86.294	92	28.471	70
>lcl|NC_005262.3_cds_NP_944281.1_50 [gene=Bcep22_gp52] [protein=hypothetical protein] [protein_id=NP_944281.1] [location=29854..30822]	61.446	99	0	0
>lcl|NC_005262.3_cds_NP_944282.1_51 [gene=Bcep22_gp53] [protein=hypothetical protein] [protein_id=NP_944282.1] [location=30832..31152]	100	99	0	0
>lcl|NC_005262.3_cds_NP_944283.1_52 [gene=Bcep22_gp54] [protein=CsrA-like regulator protein] [protein_id=NP_944283.1] [location=31170..31364]	67.213	92	0	0
>lcl|NC_005262.3_cds_NP_944284.1_53 [gene=Bcep22_gp55] [protein=major capsid protein] [protein_id=NP_944284.1] [location=31460..32554]	92.308	99	33.696	89
>lcl|NC_005262.3_cds_NP_944285.1_54 [gene=Bcep22_gp56] [protein=virion-associated phage protein] [protein_id=NP_944285.1] [location=32622..33095]	59.091	97	0	0
>lcl|NC_005262.3_cds_NP_944286.2_55 [gene=Bcep22_gp57] [protein=hypothetical protein] [protein_id=NP_944286.2] [location=33160..33798]	76.636	99	0	0
>lcl|NC_005262.3_cds_NP_944287.1_56 [gene=Bcep22_gp58] [protein=virion-associated phage protein] [protein_id=NP_944287.1] [location=33803..34396]	87.425	84	35.526	77
>lcl|NC_005262.3_cds_NP_944288.1_57 [gene=Bcep22_gp59] [protein=hypothetical protein] [protein_id=NP_944288.1] [location=34446..35078]	87.143	99	0	0
>lcl|NC_005262.3_cds_NP_944289.1_58 [gene=Bcep22_gp60] [protein=virion-associated phage protein] [protein_id=NP_944289.1] [location=35088..35507]	66.429	99	37.41	99
>lcl|NC_005262.3_cds_NP_944290.1_59 [gene=Bcep22_gp61] [protein=virion-associated phage protein] [protein_id=NP_944290.1] [location=35515..36255]	35.87	76	0	0
>lcl|NC_005262.3_cds_NP_944291.1_60 [gene=Bcep22_gp62] [protein=pectin lyase-like protein] [protein_id=NP_944291.1] [location=36252..38318]	84.928	99	0	0
>lcl|NC_005262.3_cds_NP_944292.2_61 [gene=Bcep22_gp63] [protein=virion-associated phage protein] [protein_id=NP_944292.2] [location=38373..38654]	44.565	98	34.146	87
>lcl|NC_005262.3_cds_NP_944293.1_62 [gene=Bcep22_gp64] [protein=phage tail fiber protein] [protein_id=NP_944293.1] [location=38664..39941]	55.556	23	36.458	23
>lcl|NC_005262.3_cds_NP_944294.2_63 [gene=Bcep22_gp65] [protein=phage tail fiber protein] [protein_id=NP_944294.2] [location=40112..40990]	53.535	34	38.333	37
>lcl|NC_005262.3_cds_NP_944295.1_64 [gene=Bcep22_gp66] [protein=phage tail fiber protein] [protein_id=NP_944295.1] [location=40993..41895]	53.763	31	47.826	15
>lcl|NC_005262.3_cds_NP_944296.1_65 [gene=Bcep22_gp67] [protein=virion-associated phage protein] [protein_id=NP_944296.1] [location=41958..43700]	92.069	99	31.77	77
>lcl|NC_005262.3_cds_NP_944297.1_66 [gene=Bcep22_gp68] [protein=virion-associated phage protein] [protein_id=NP_944297.1] [location=43702..44055]	68.966	97	0	0
[truncated: 4,725 more rows]
