# Supplementary material for: The use of informativity in the development of robust viromics-based examinations
Source: PeerJ. 2017 May 2;5:e3281. doi: 10.7717/peerj.3281 (PMC5417064; doi:10.7717/peerj.3281)
Supplement: Table S3 — SRA datasets included in the proof-of-concept investigation for Pseudomonas phage PB1 viruses. Each row listed was considered an individual sample. [file peerj-05-3281-s005.docx]

**Table S3.** SRA datasets included in the proof-of-concept investigation for Pseudomonas phage PB1 viruses. Each row listed was considered an individual sample.

| **Virome** | **SRA run datasets** |
| --- | --- |
| **I** | SRR1301999 |
| SRR1302020 |
| SRR1302010 |
| SRR1296481 |
| SRR1974493 |
| SRR1974494 |
| SRR1974490 |
| SRR1974491 |
| SRR1974495 |
| SRR1974496 |
| SRR1974497 |
| SRR1974498 |
| SRR1915829 |
| SRR1915851 |
| SRR1974488 |
| SRR1974489 |
| SRR1974499 |
| SRR1974500 |
| SRR1974501 |
| SRR1974502 |
| SRR1974503 |
| SRR1974504 |
| SRR1974505 |
| SRR1974506 |
| SRR1974507 |
| SRR1974508 |
| SRR1974509 |
| SRR1974510 |
| SRR1974511 |
| SRR1974512 |
| SRR1974513 |
| SRR1974514 |
| SRR1974515 |
| SRR1974516 |
| SRR1974517 |

| **Virome** | **SRA run datasets** |
| --- | --- |
| **II** | ERR019477 |
| ERR019478 |
| **III** | SRR001047 |
| SRR001075 |
| SRR001076 |
| **IV** | SRR013515, SRR013516, SRR013517 |
| SRR013520, SRR013521 |
| **V** | SRR014584 |
| SRR014585 |
| SRR014586 |
| SRR014587 |
| SRR014588 |
| SRR014589 |
| **VI** | SRR138365 |
| SRR155589 |
| SRR171296 |
| **VII** | SRR371574 |
| SRR648311 |
| SRR648312 |
| SRR648313 |
| SRR648314 |
